# Supplementary material for: Genomes to natural products PRediction Informatics for Secondary Metabolomes (PRISM)
Source: PubMed Central journal article supplement (PMC4787774; doi:10.1093/nar/gkv1012), 2015-10-05

A40926

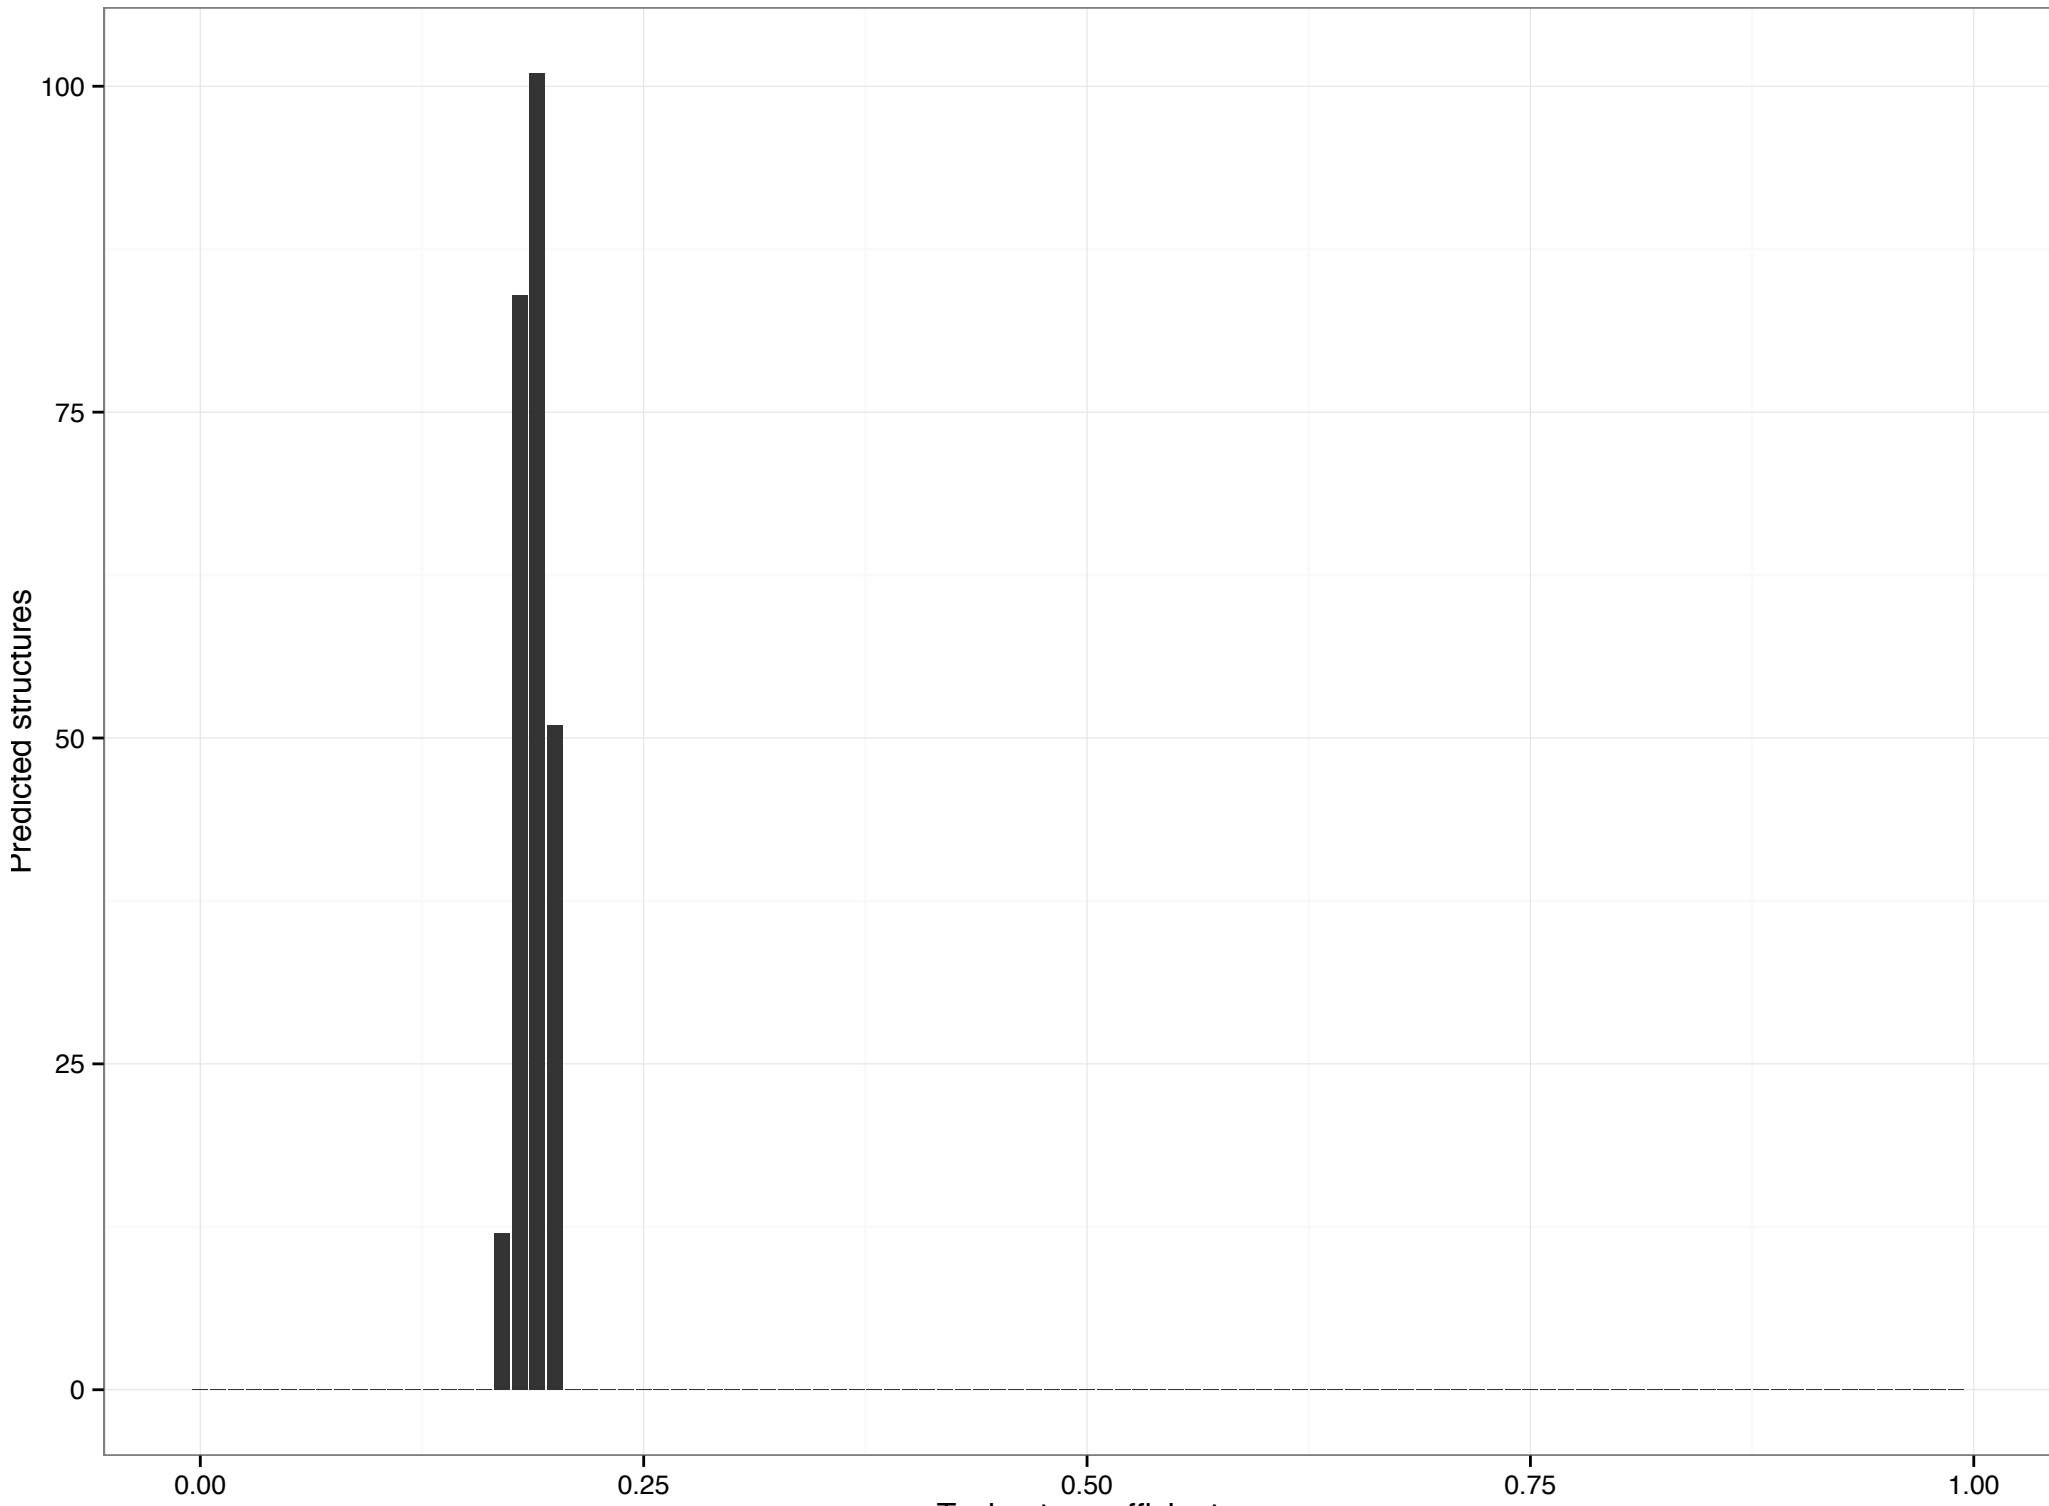

A47934

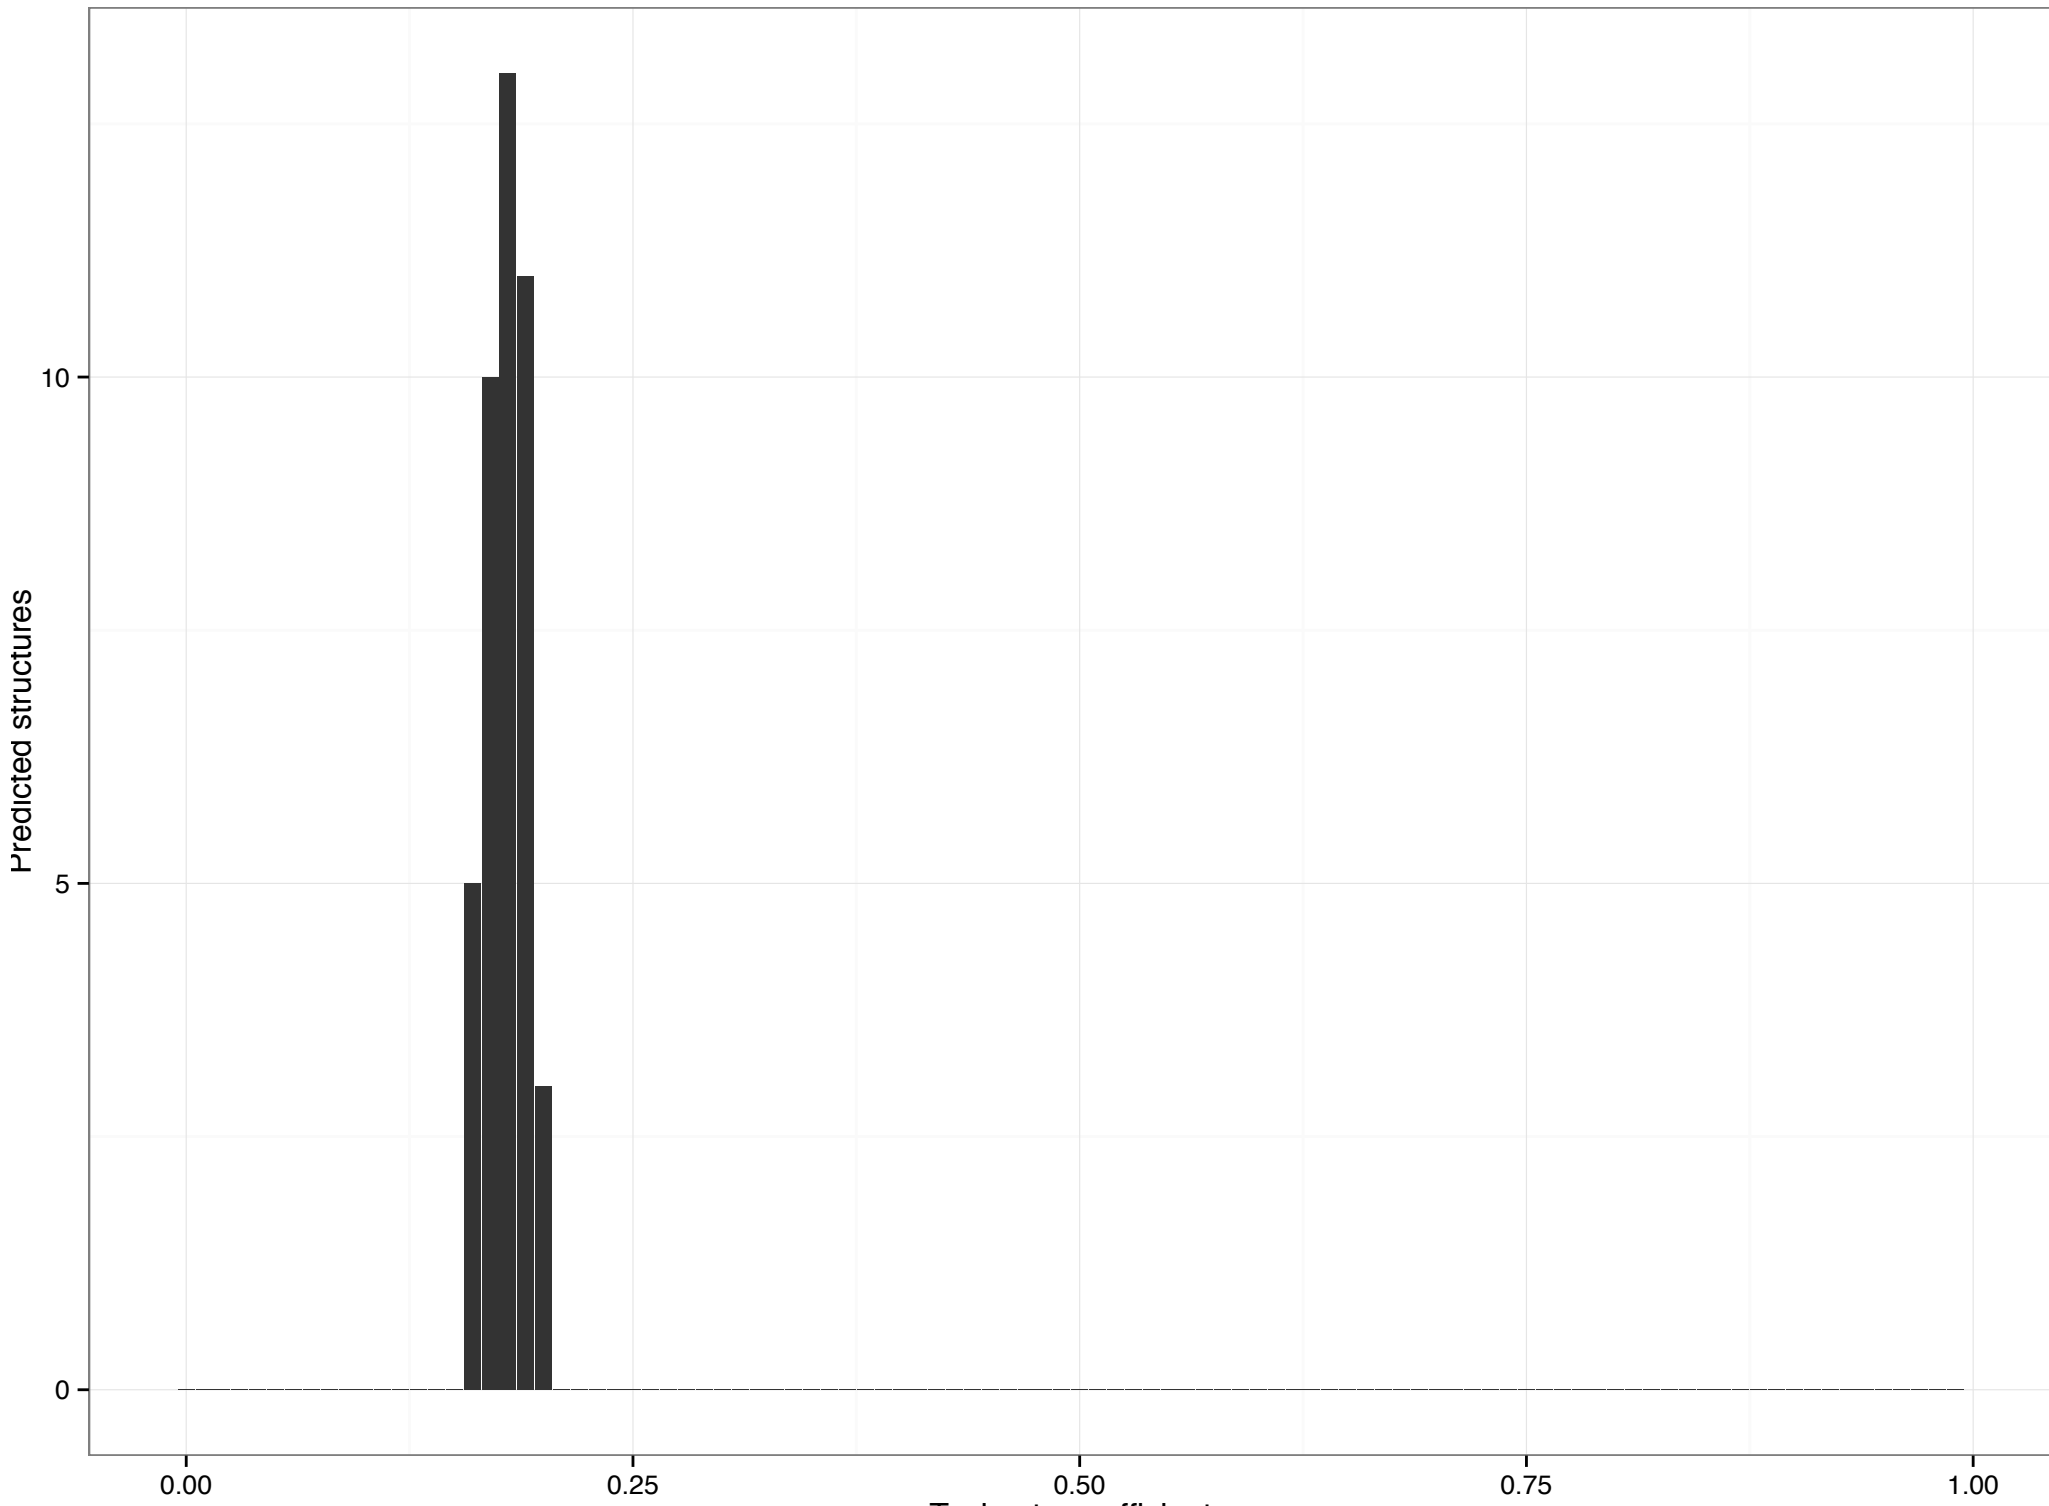

# Amphotericin

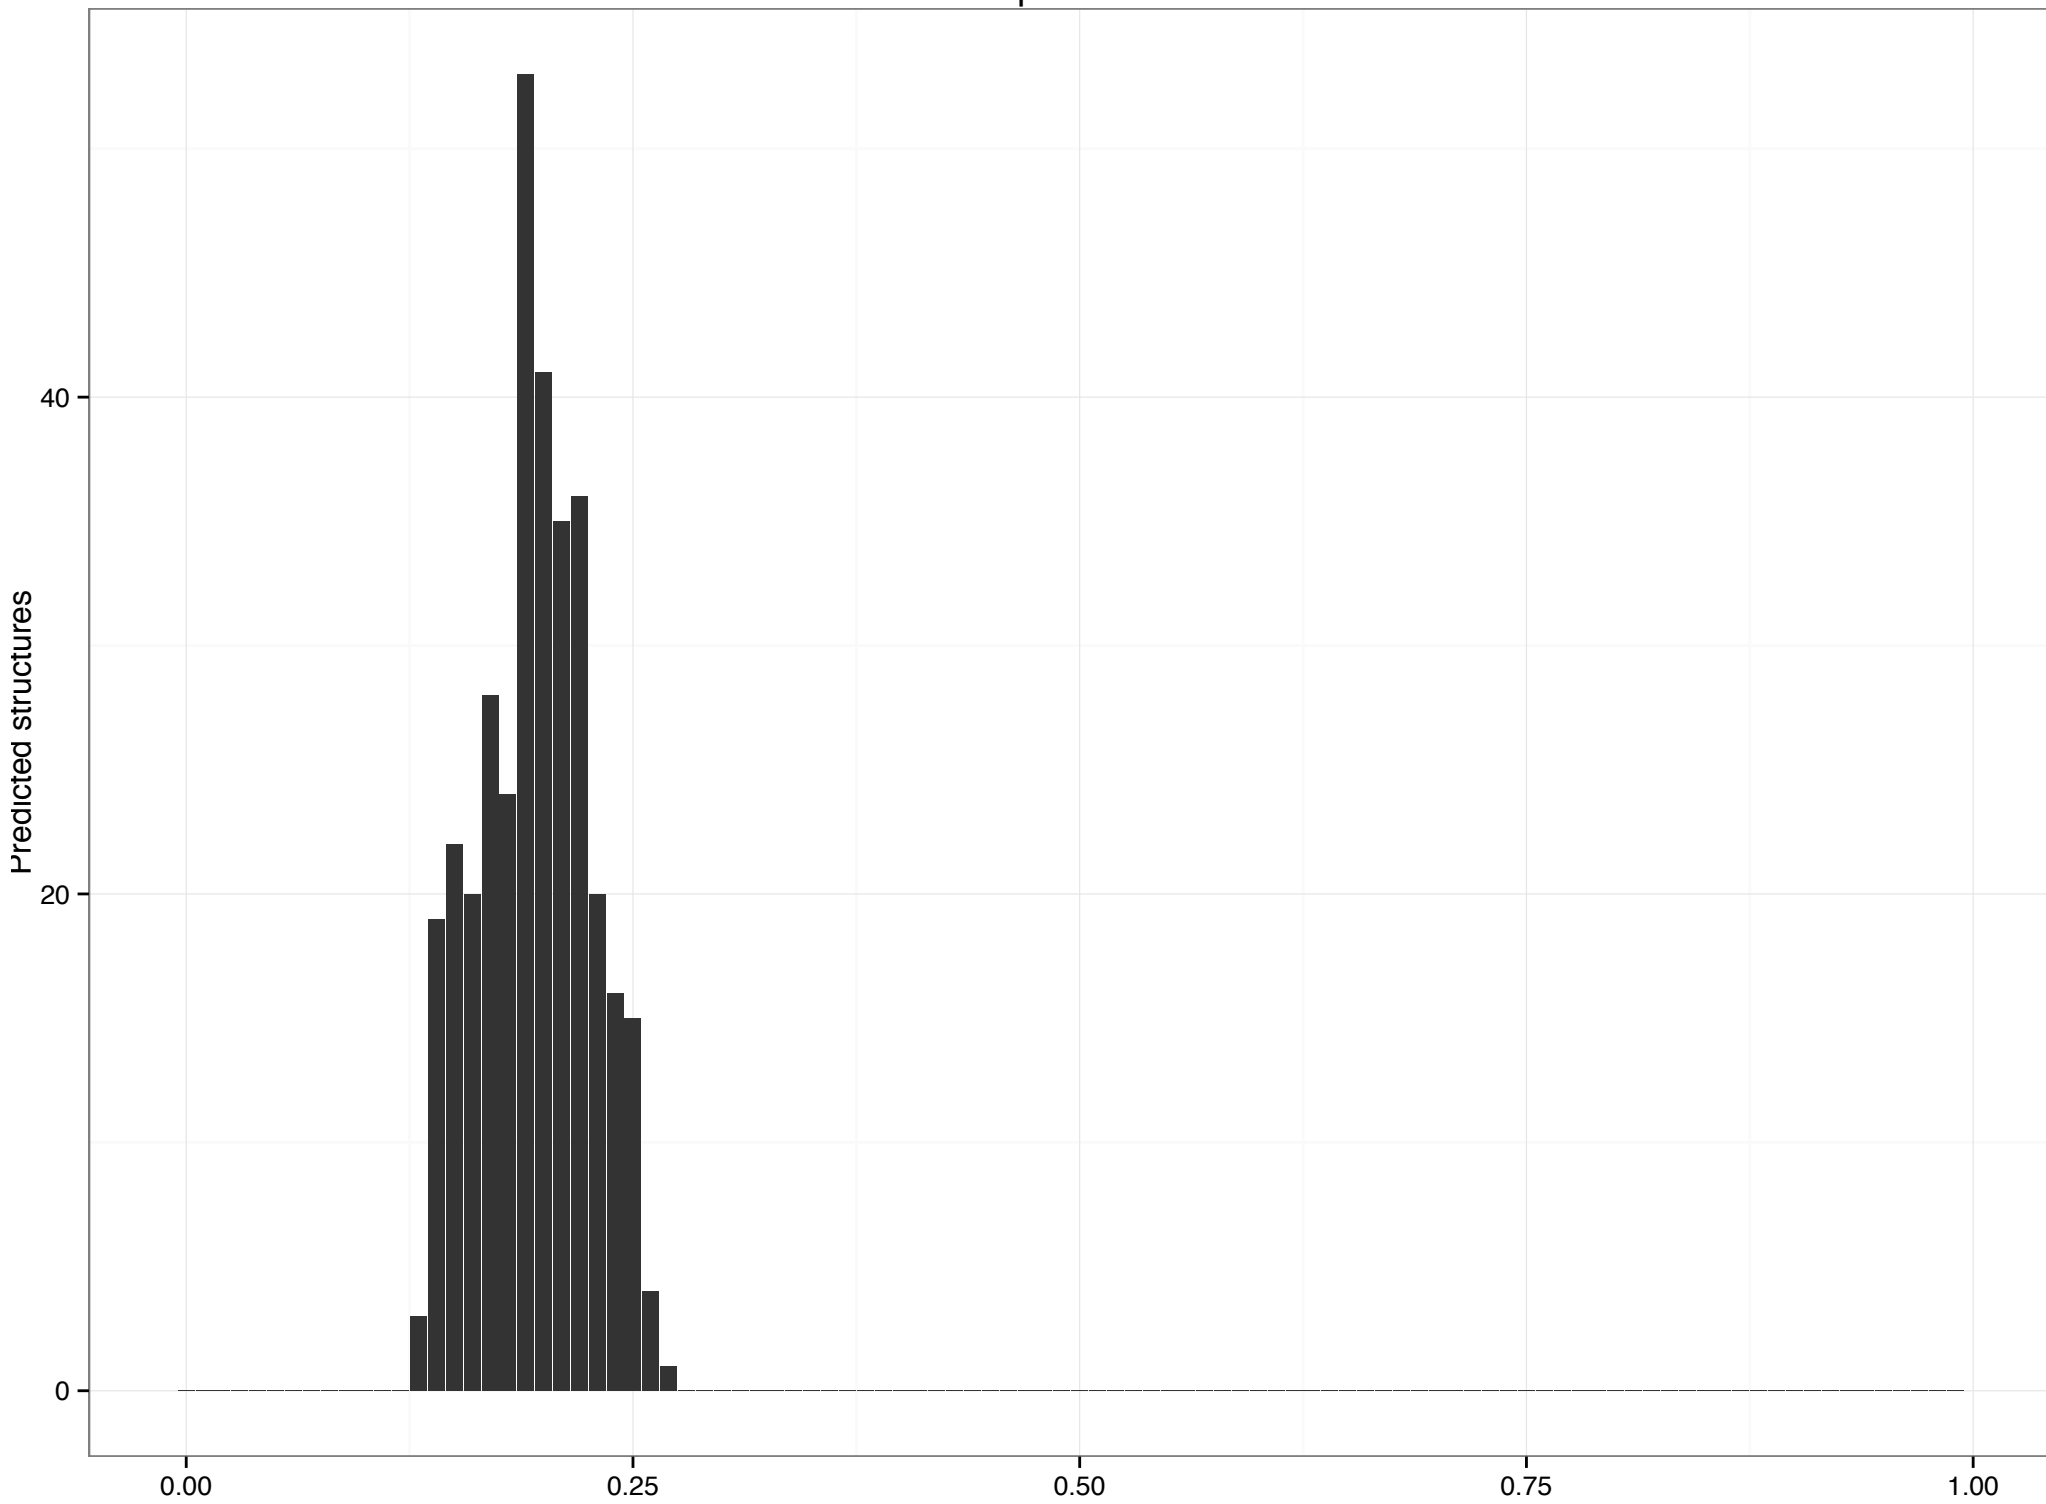

# Apoptolidin

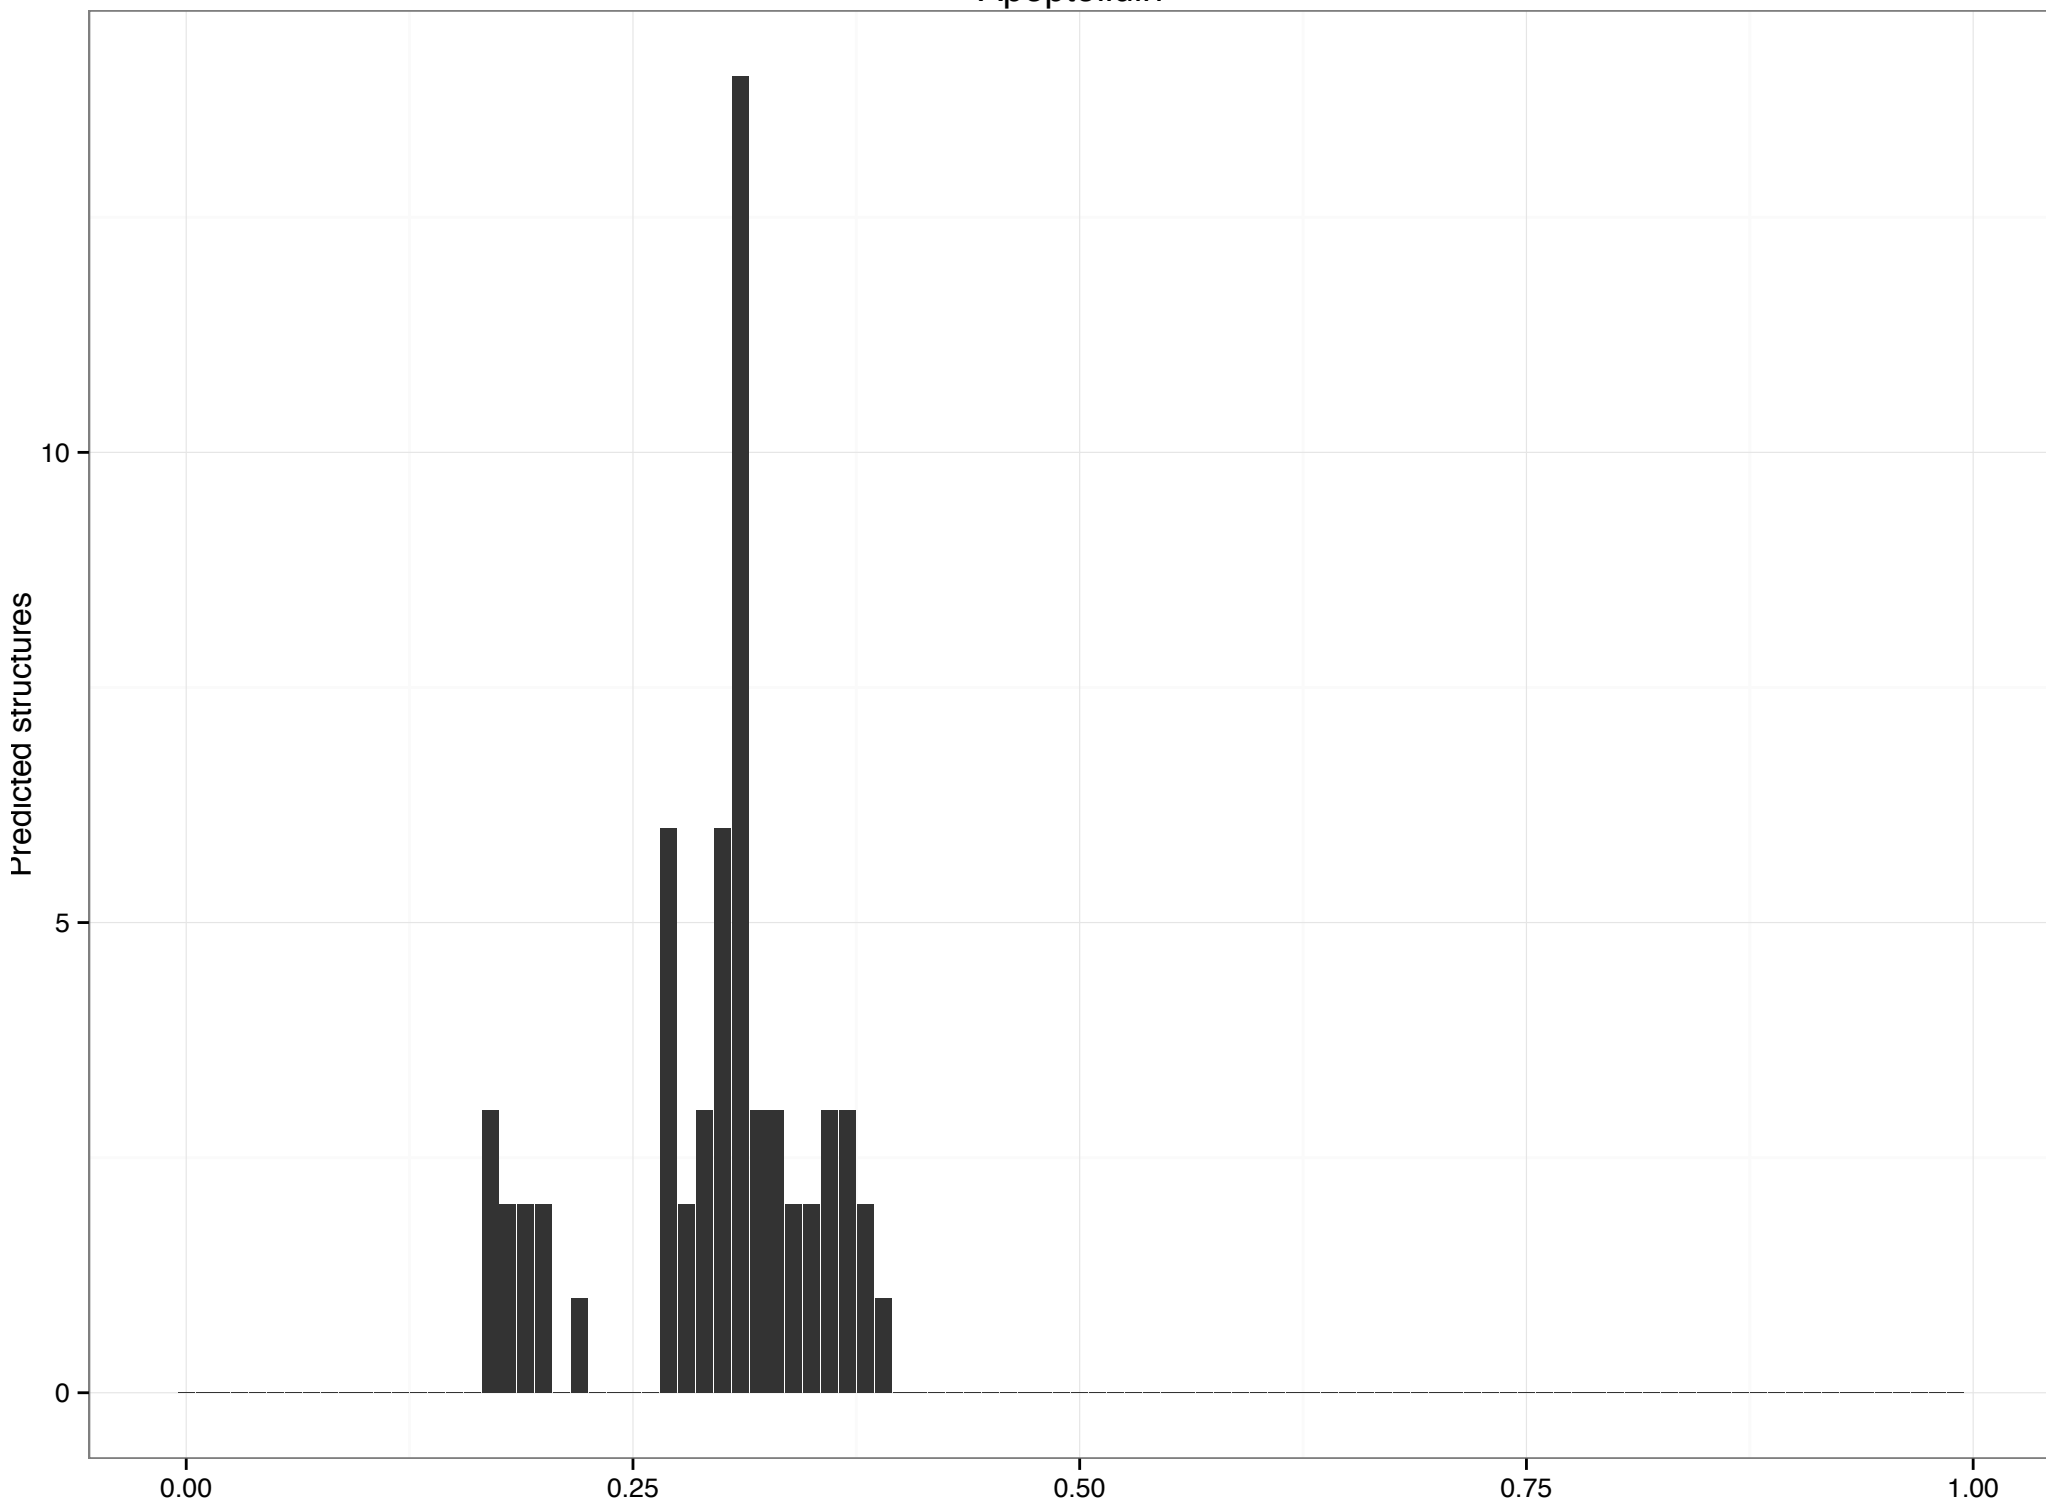

# Balhimycin

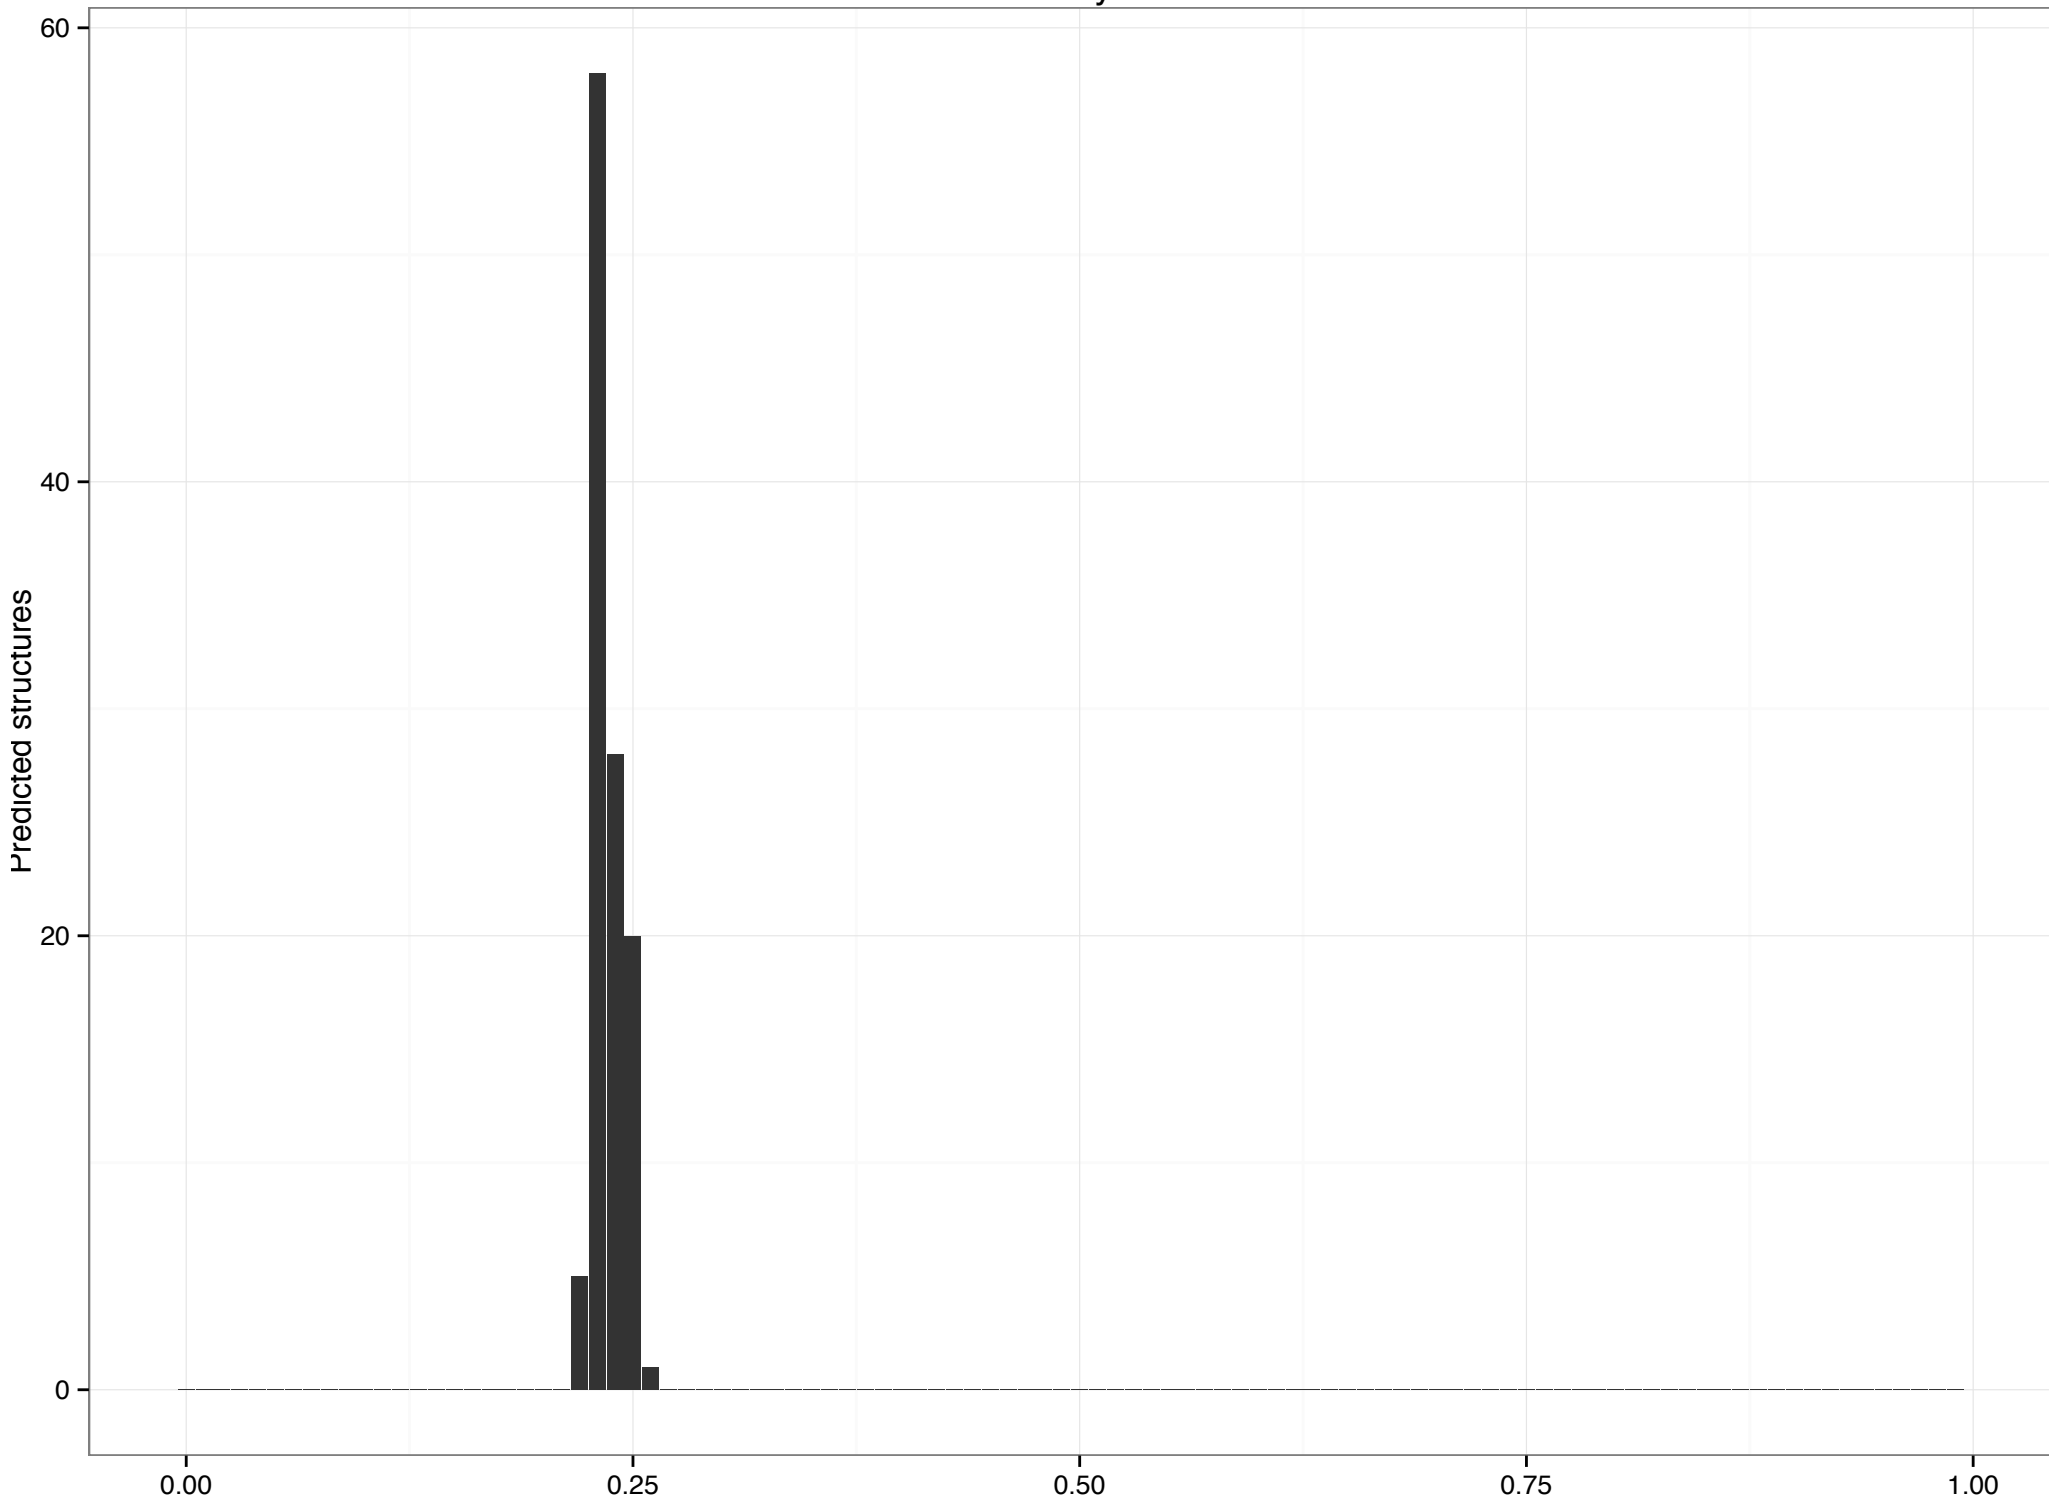

BE-14106

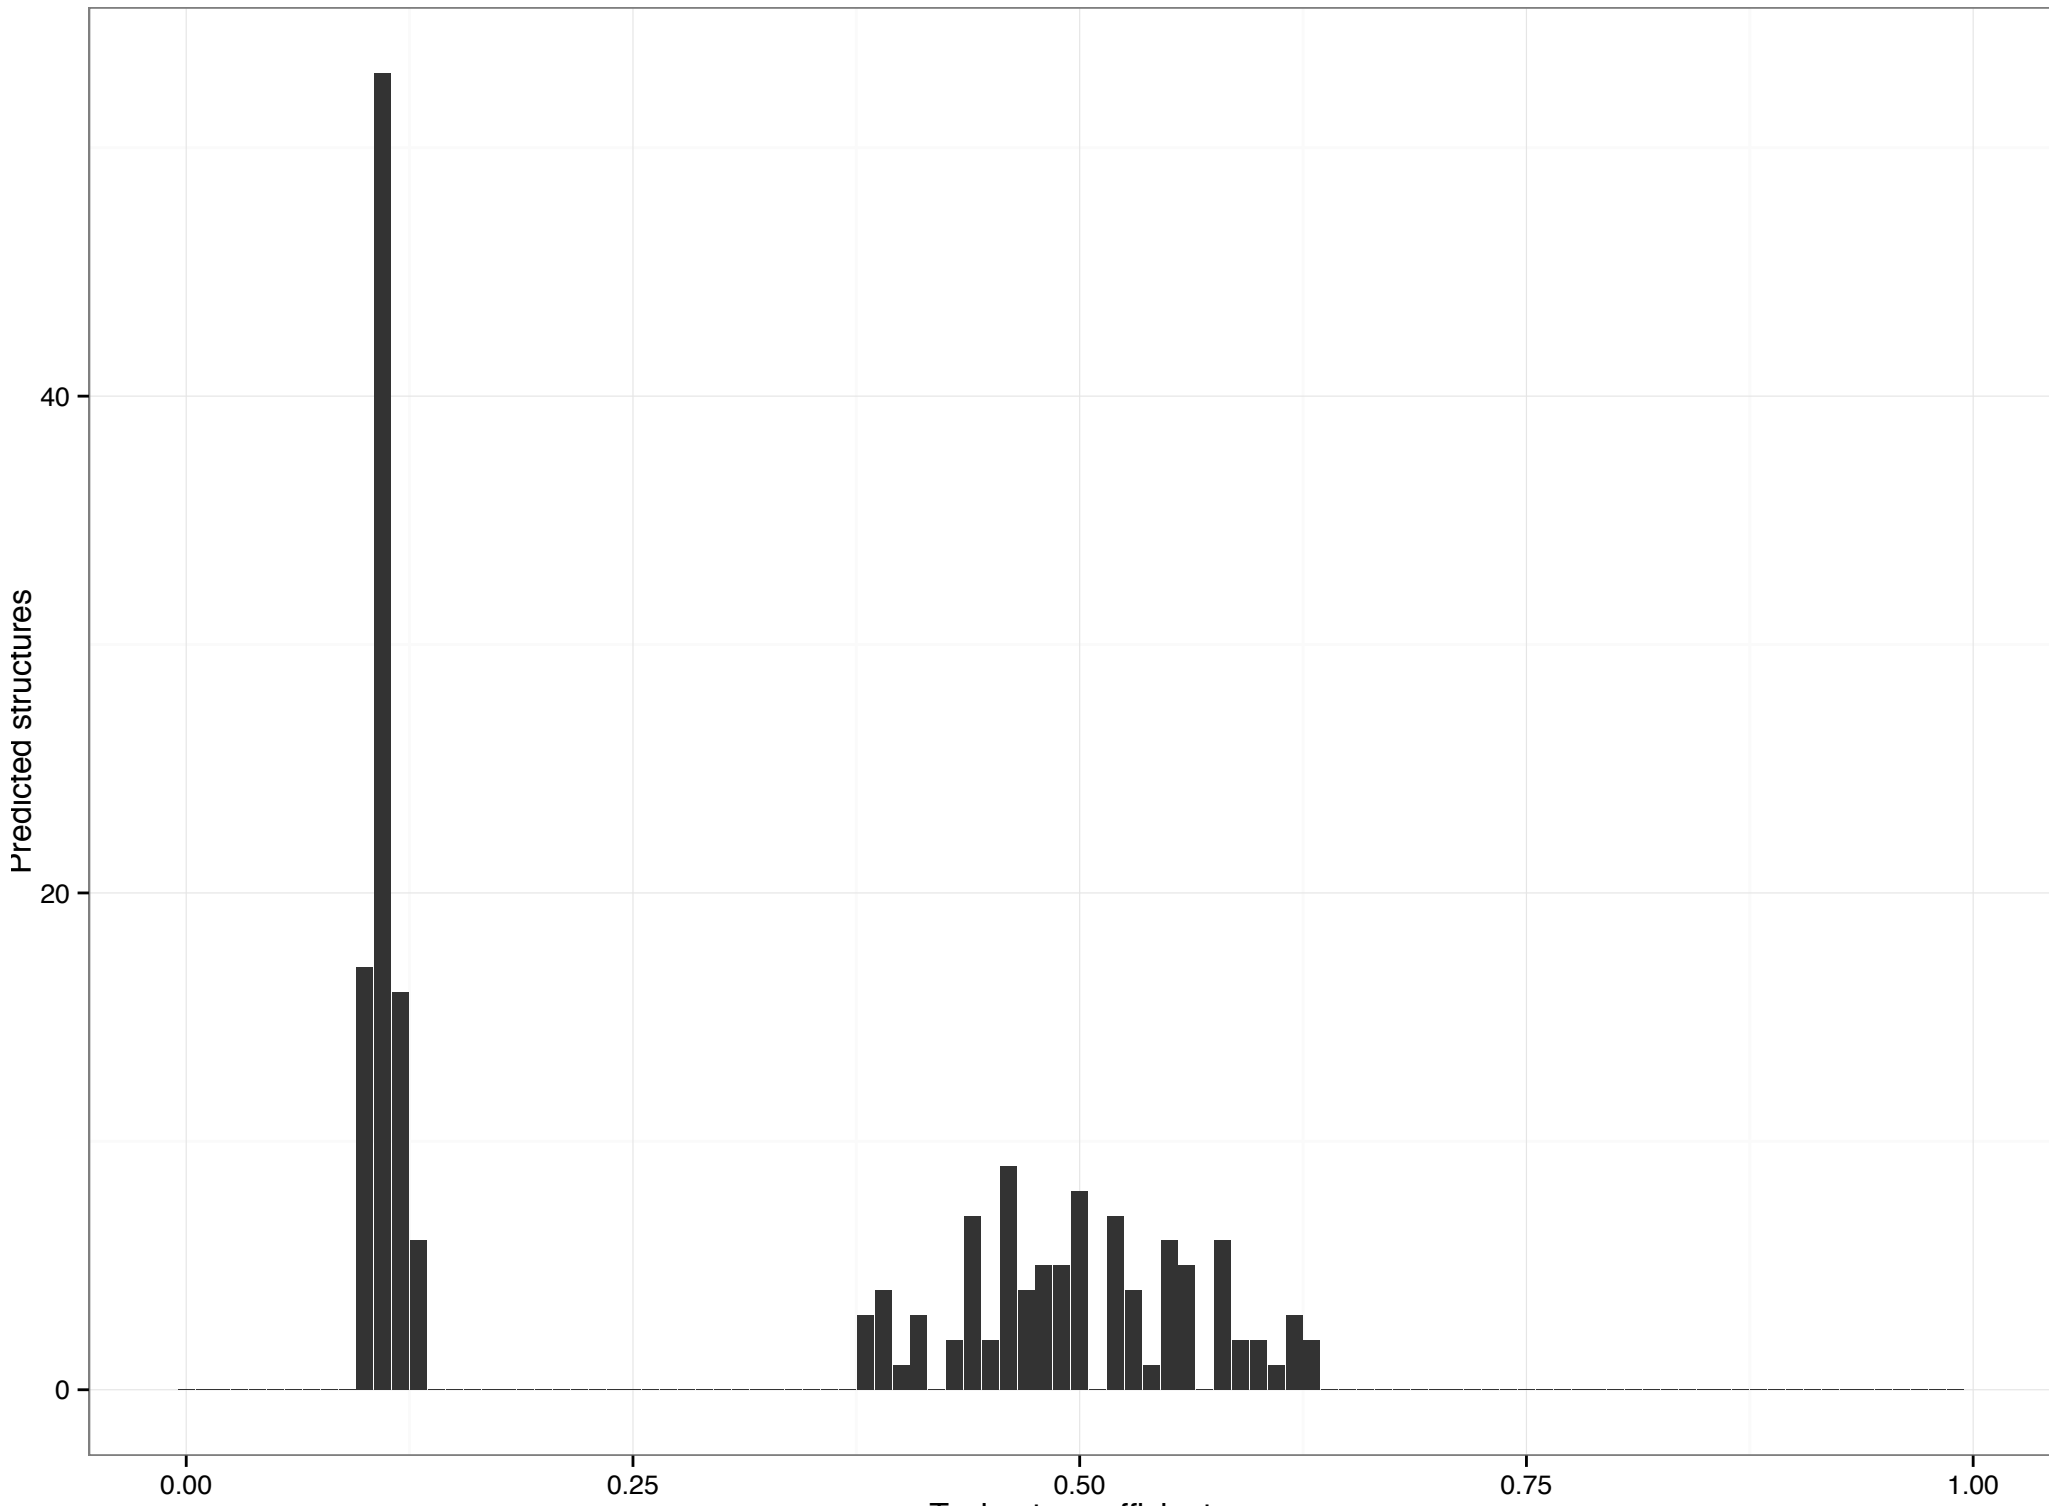

# Bleomycin

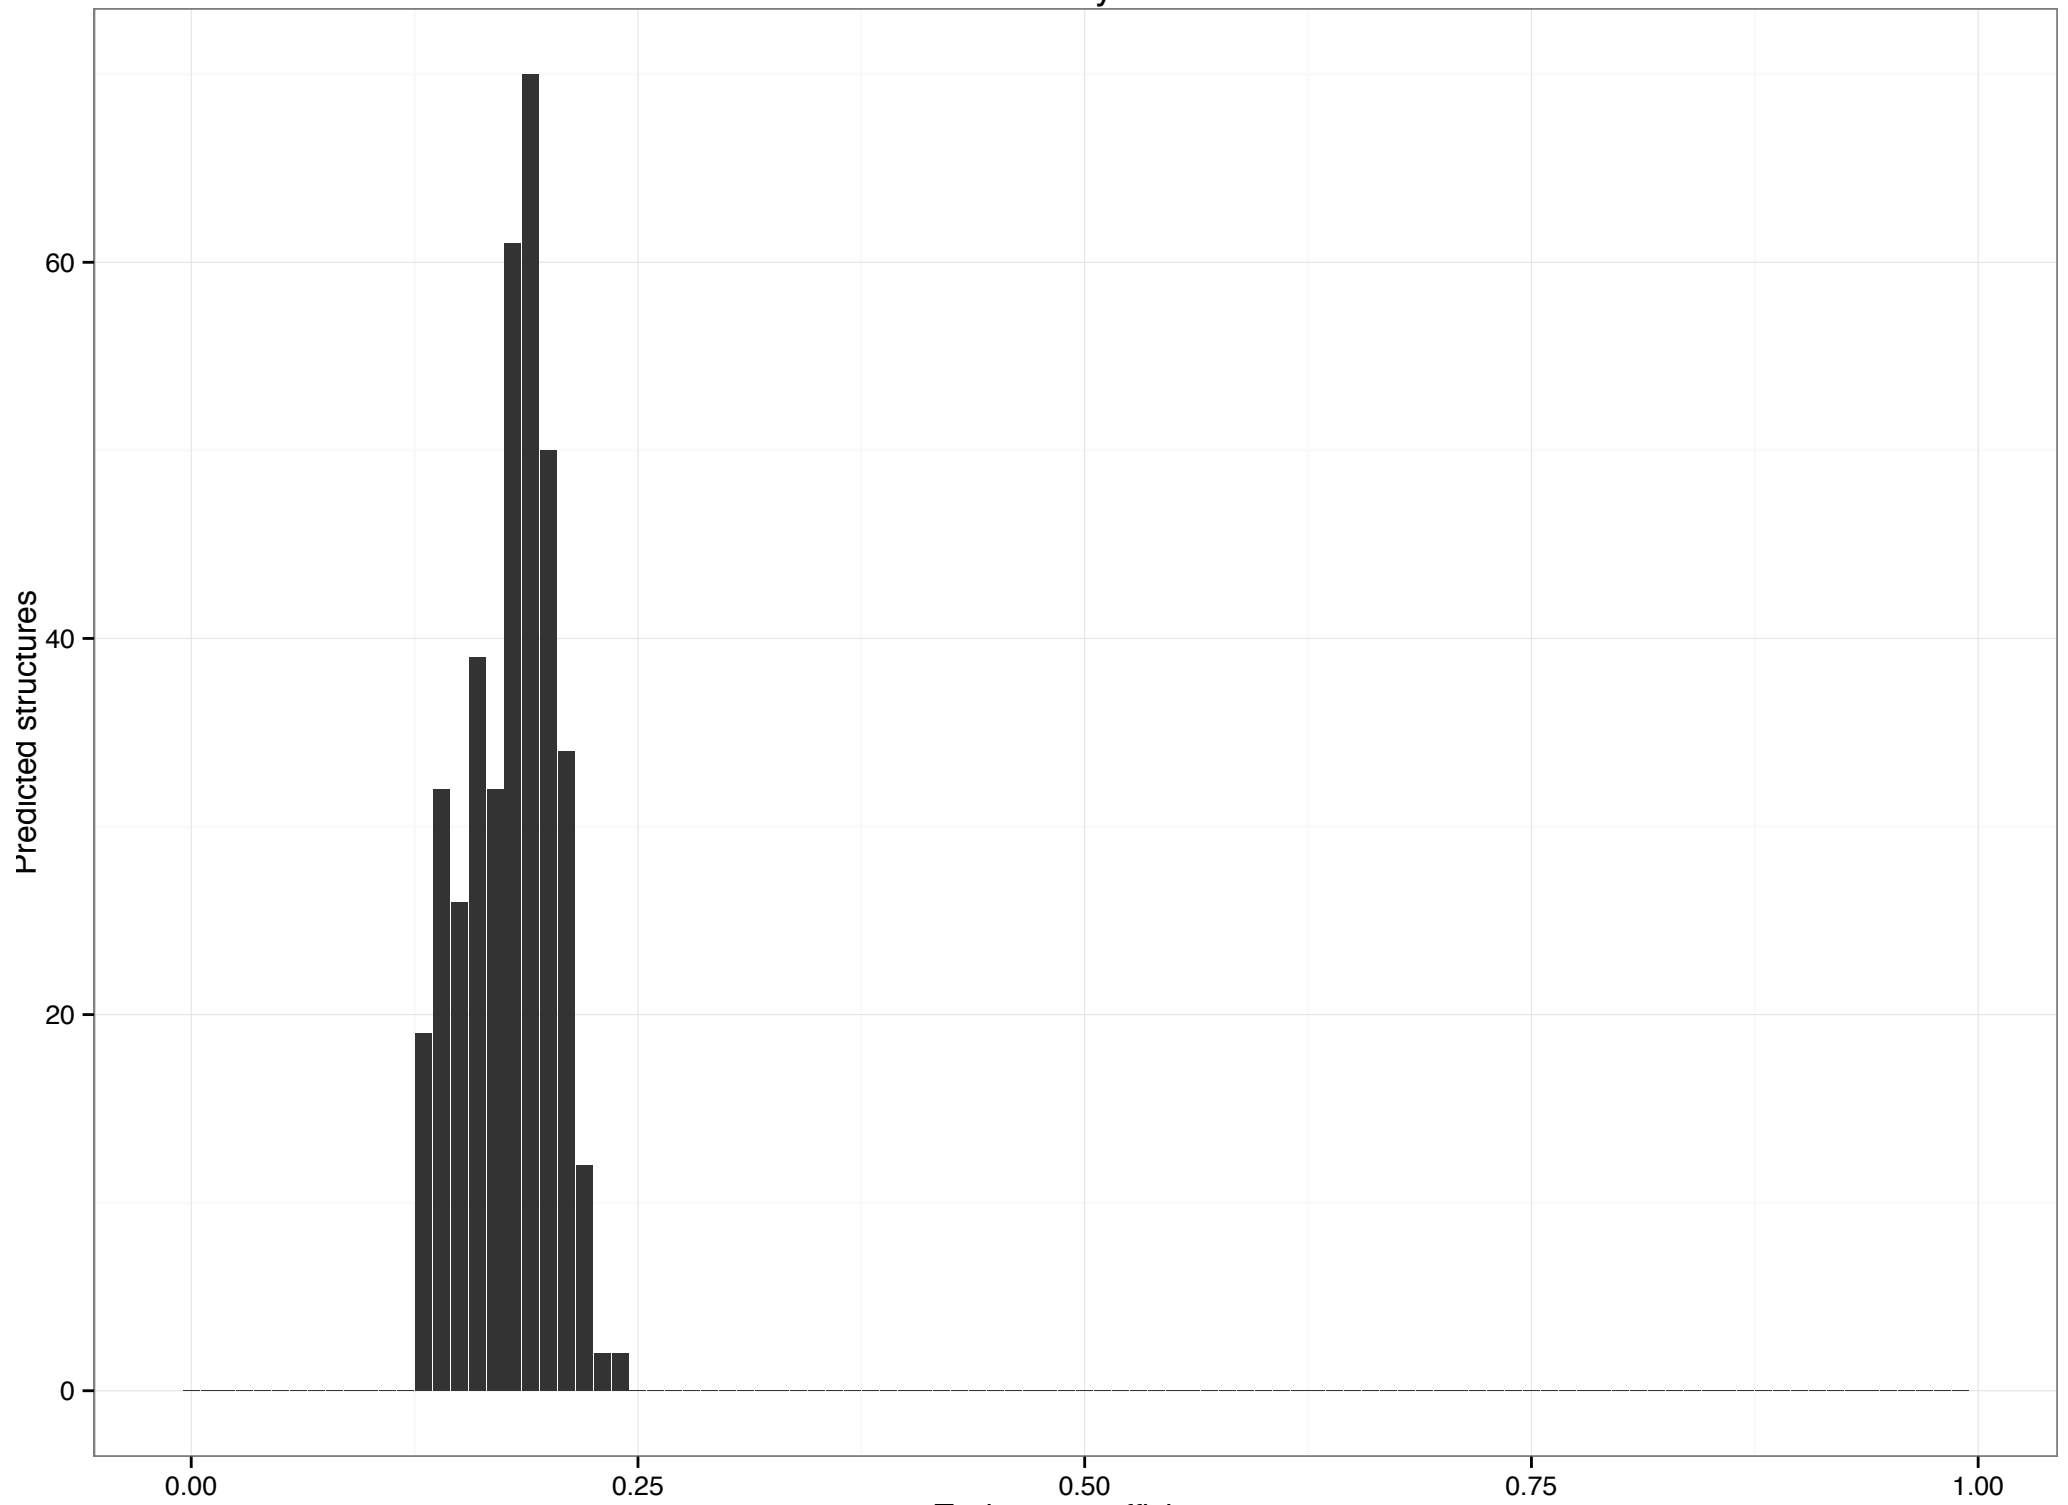

# Concanamycin A

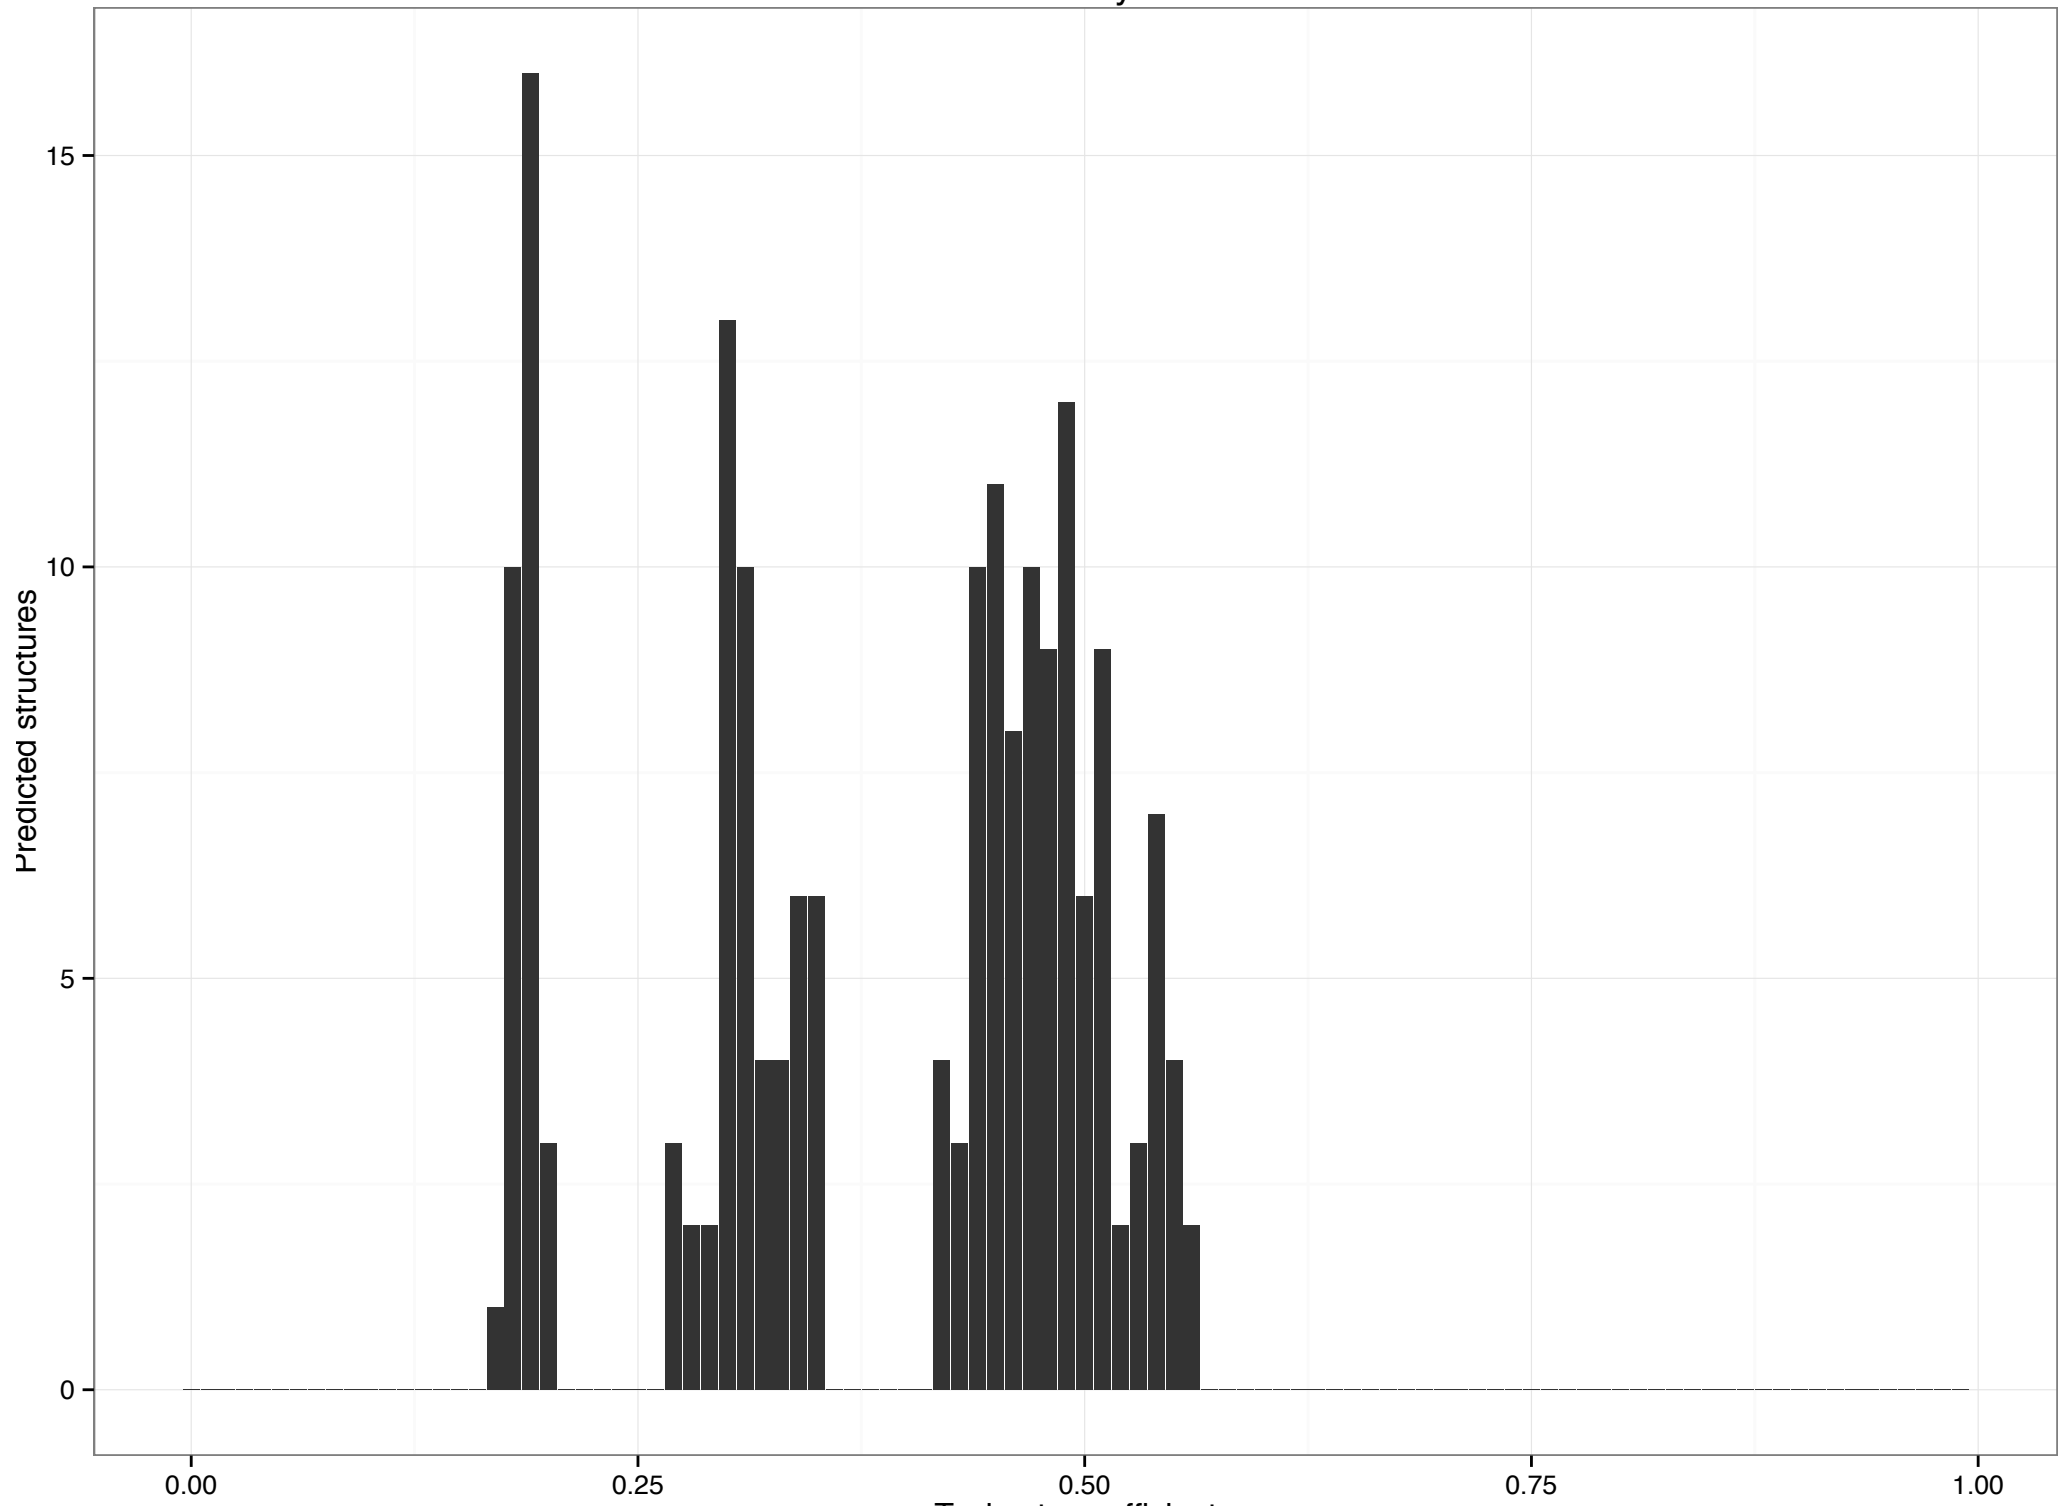



FR-008

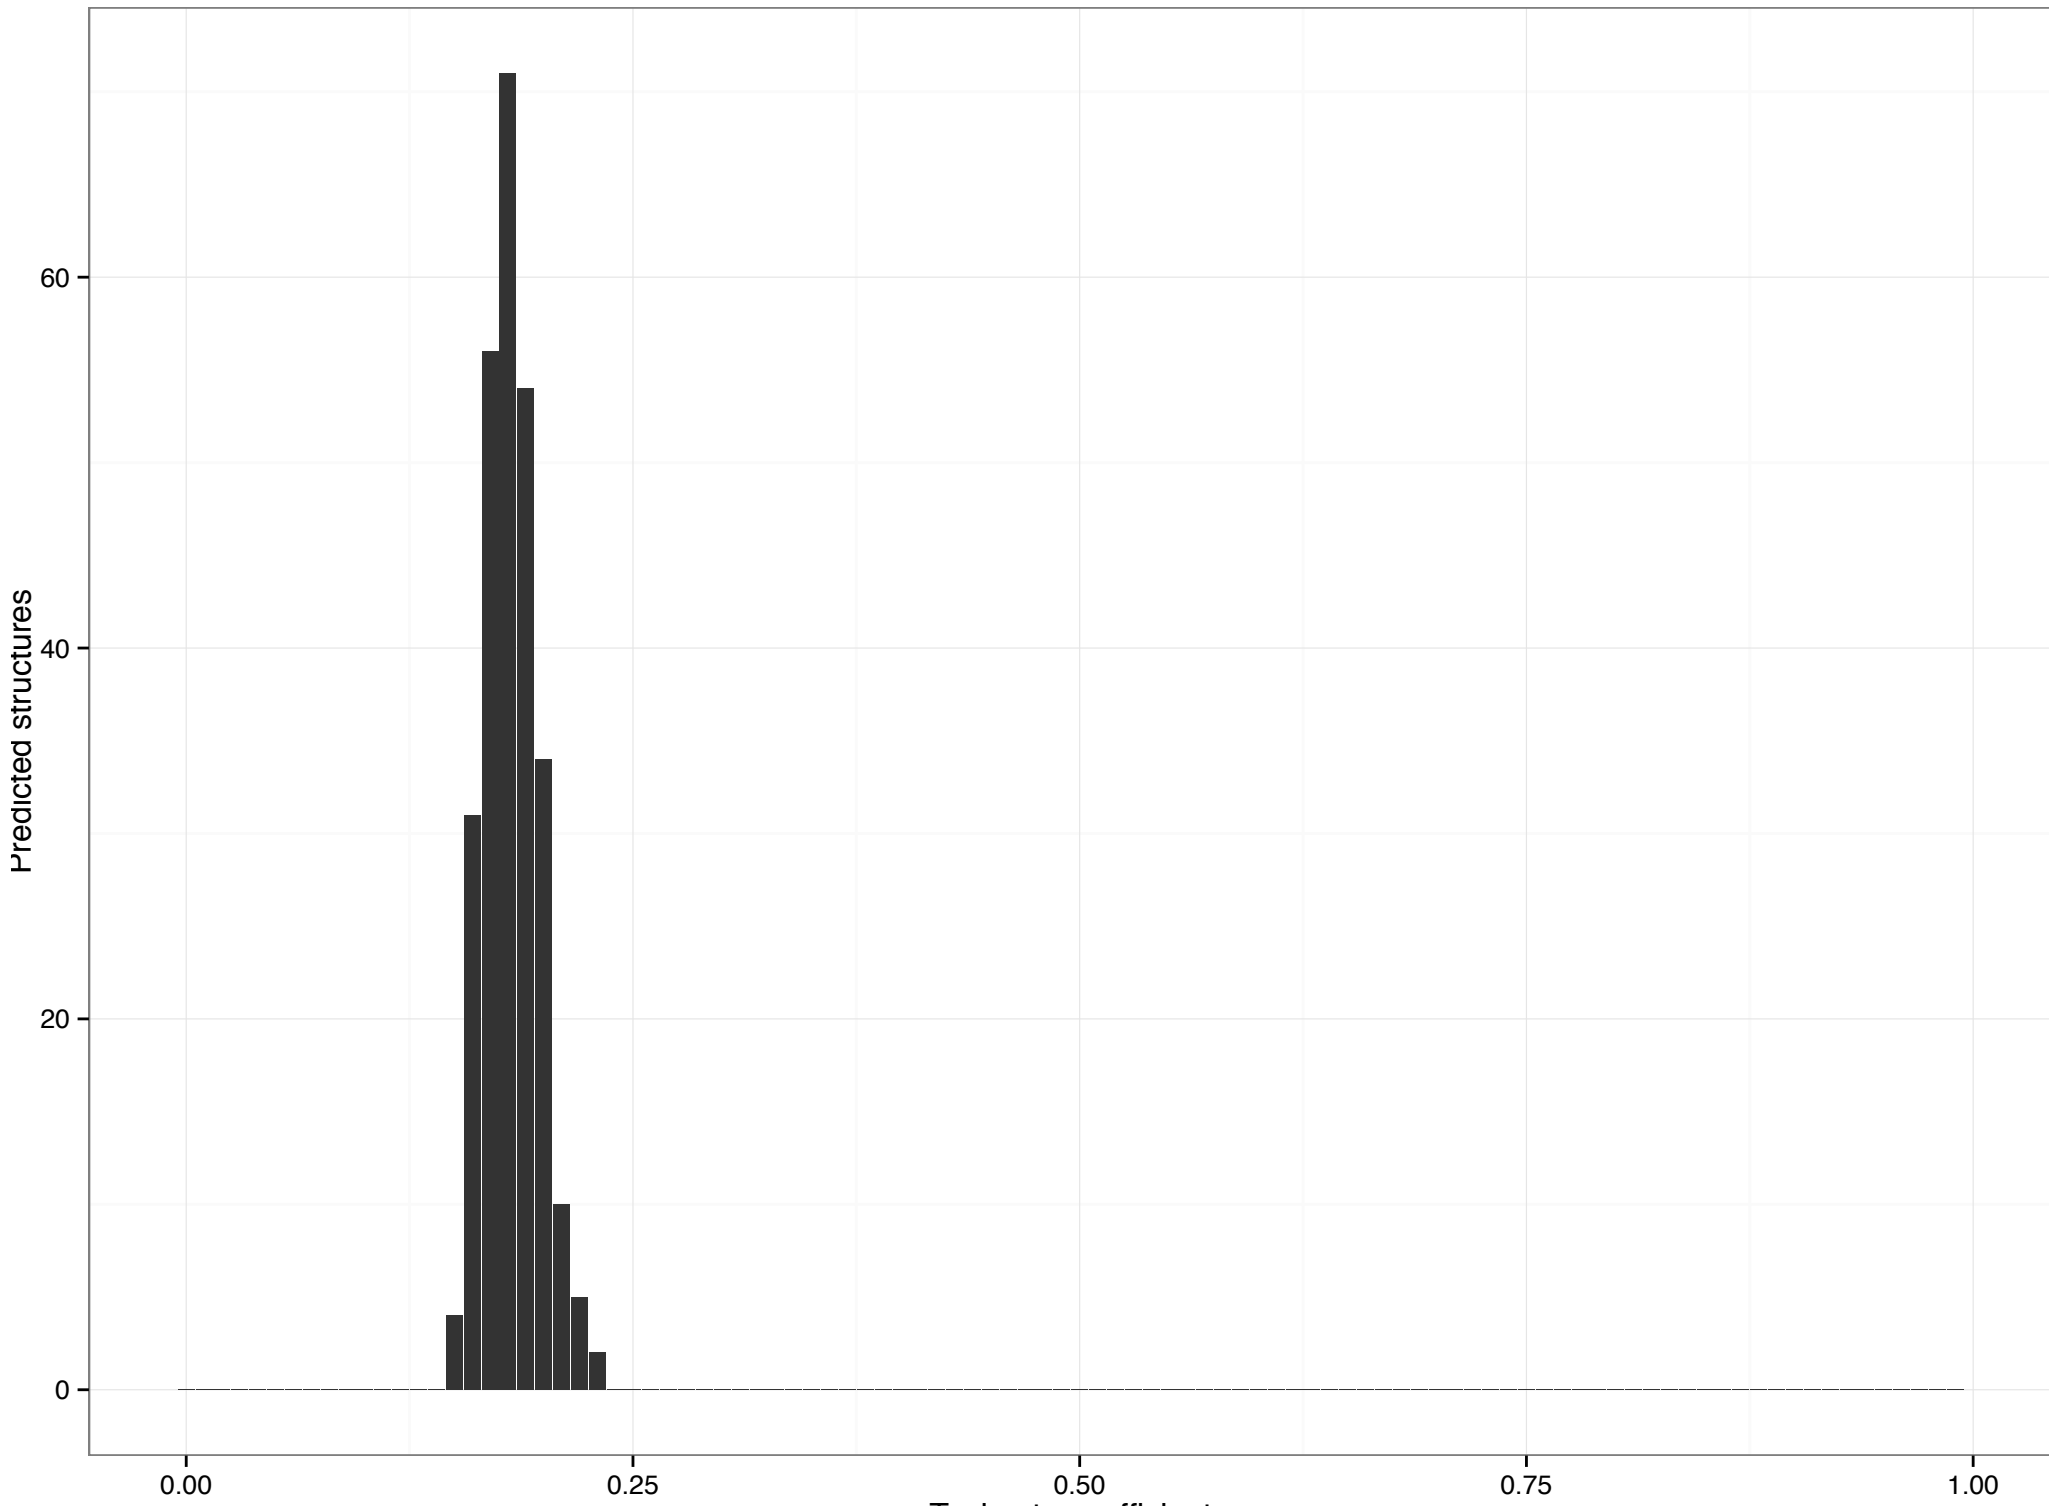

# Meridamycin

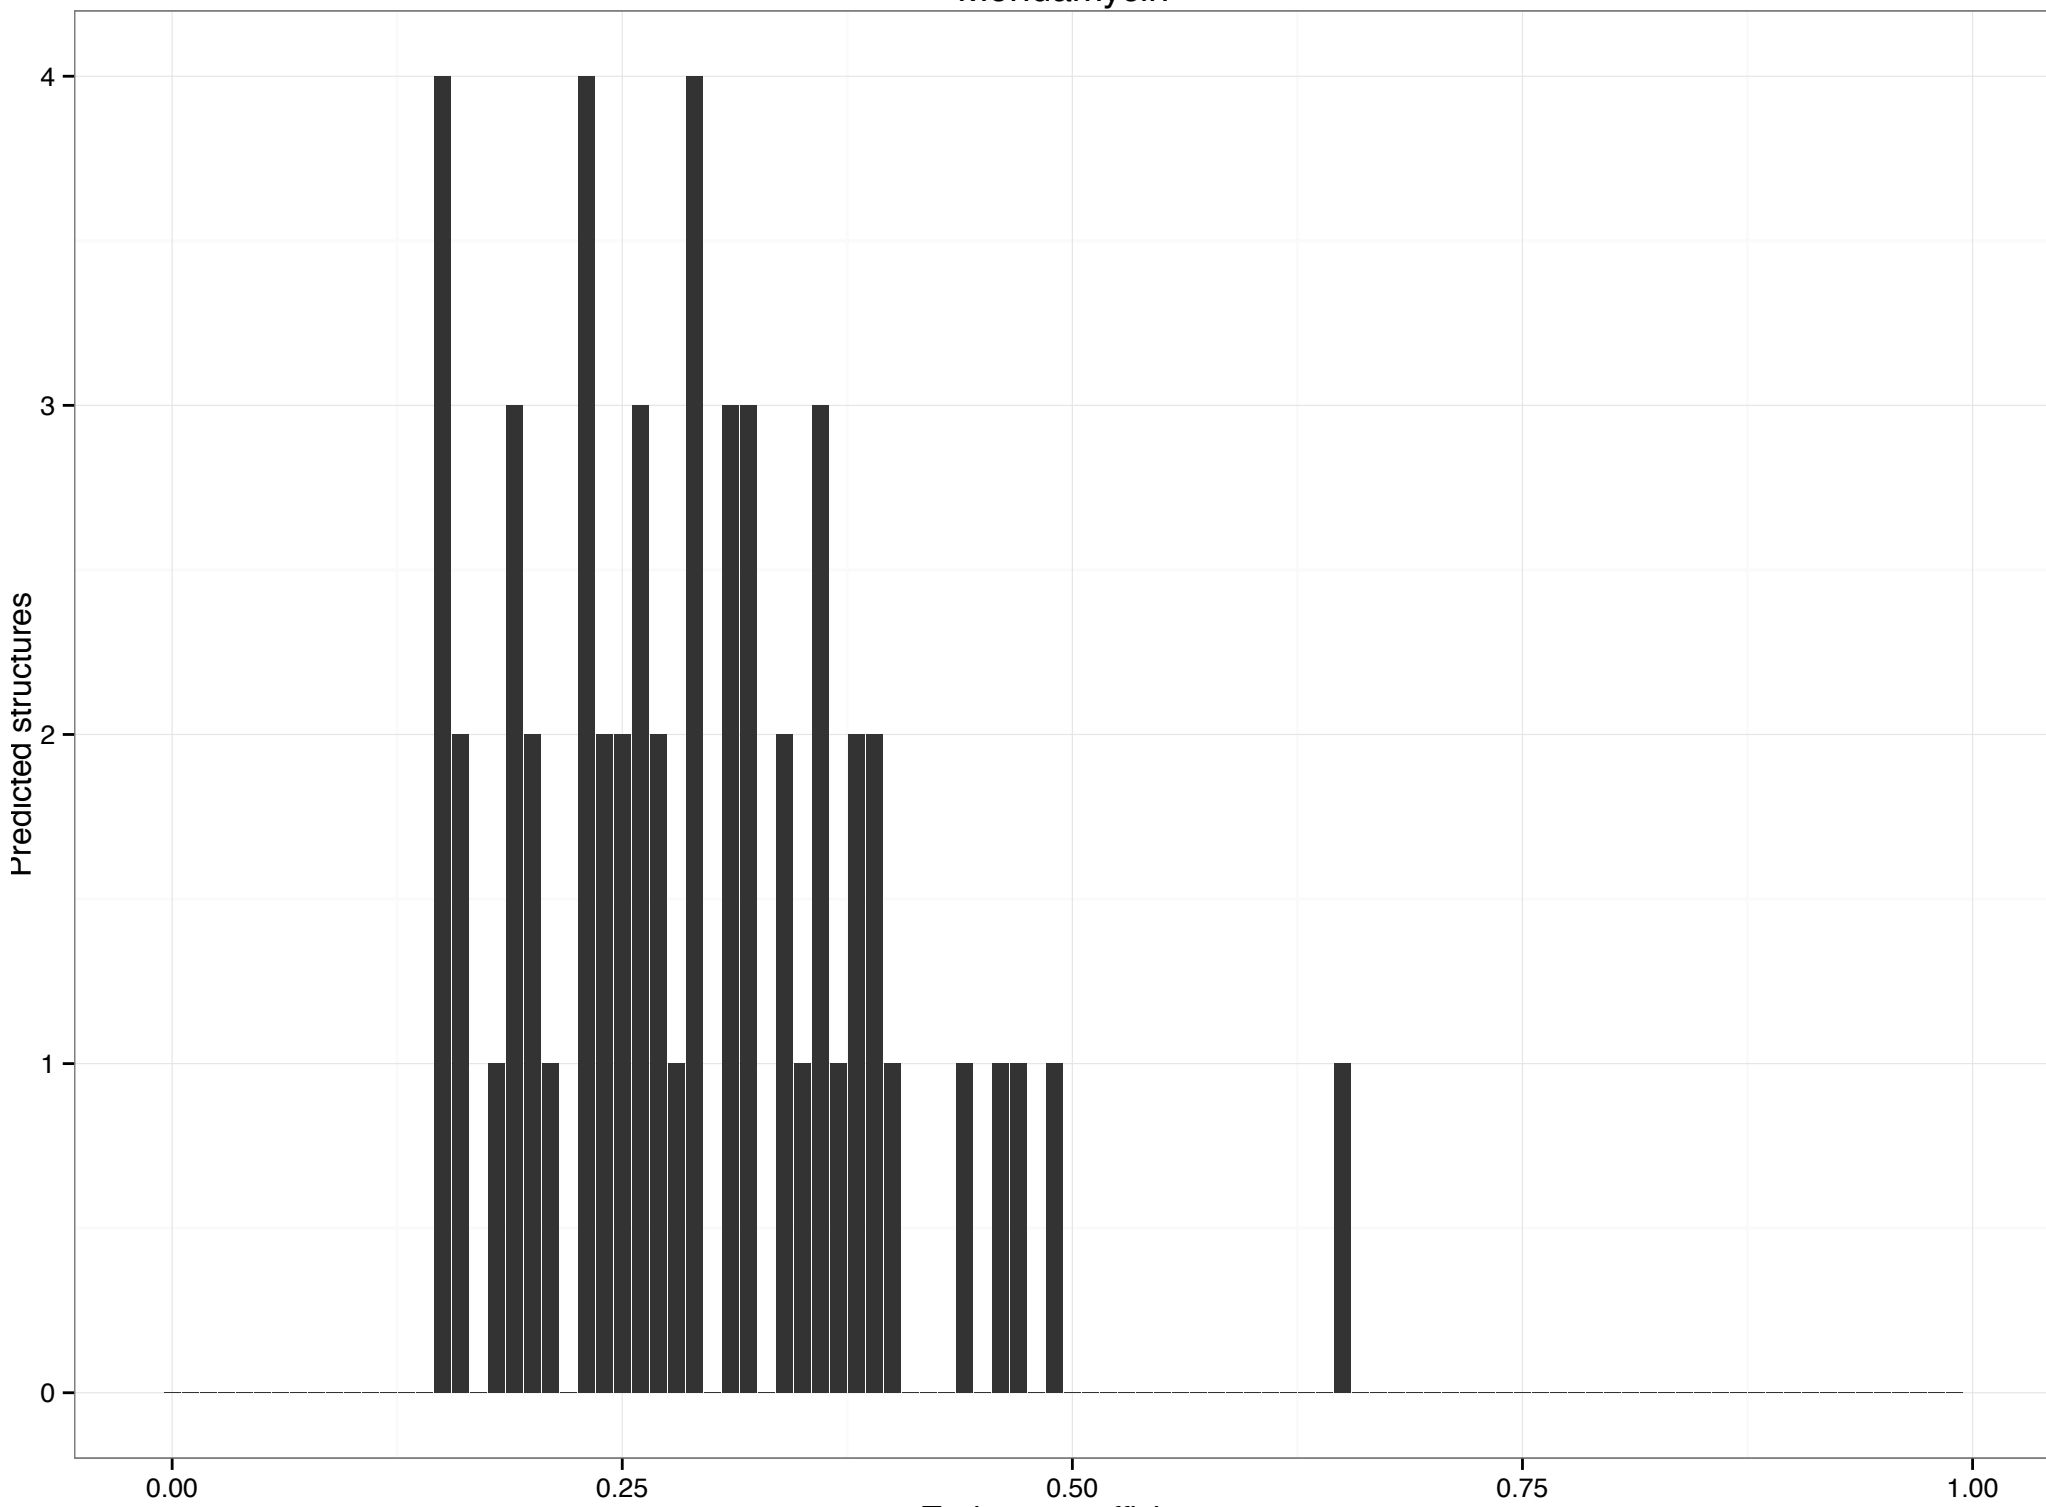

# Microcystin

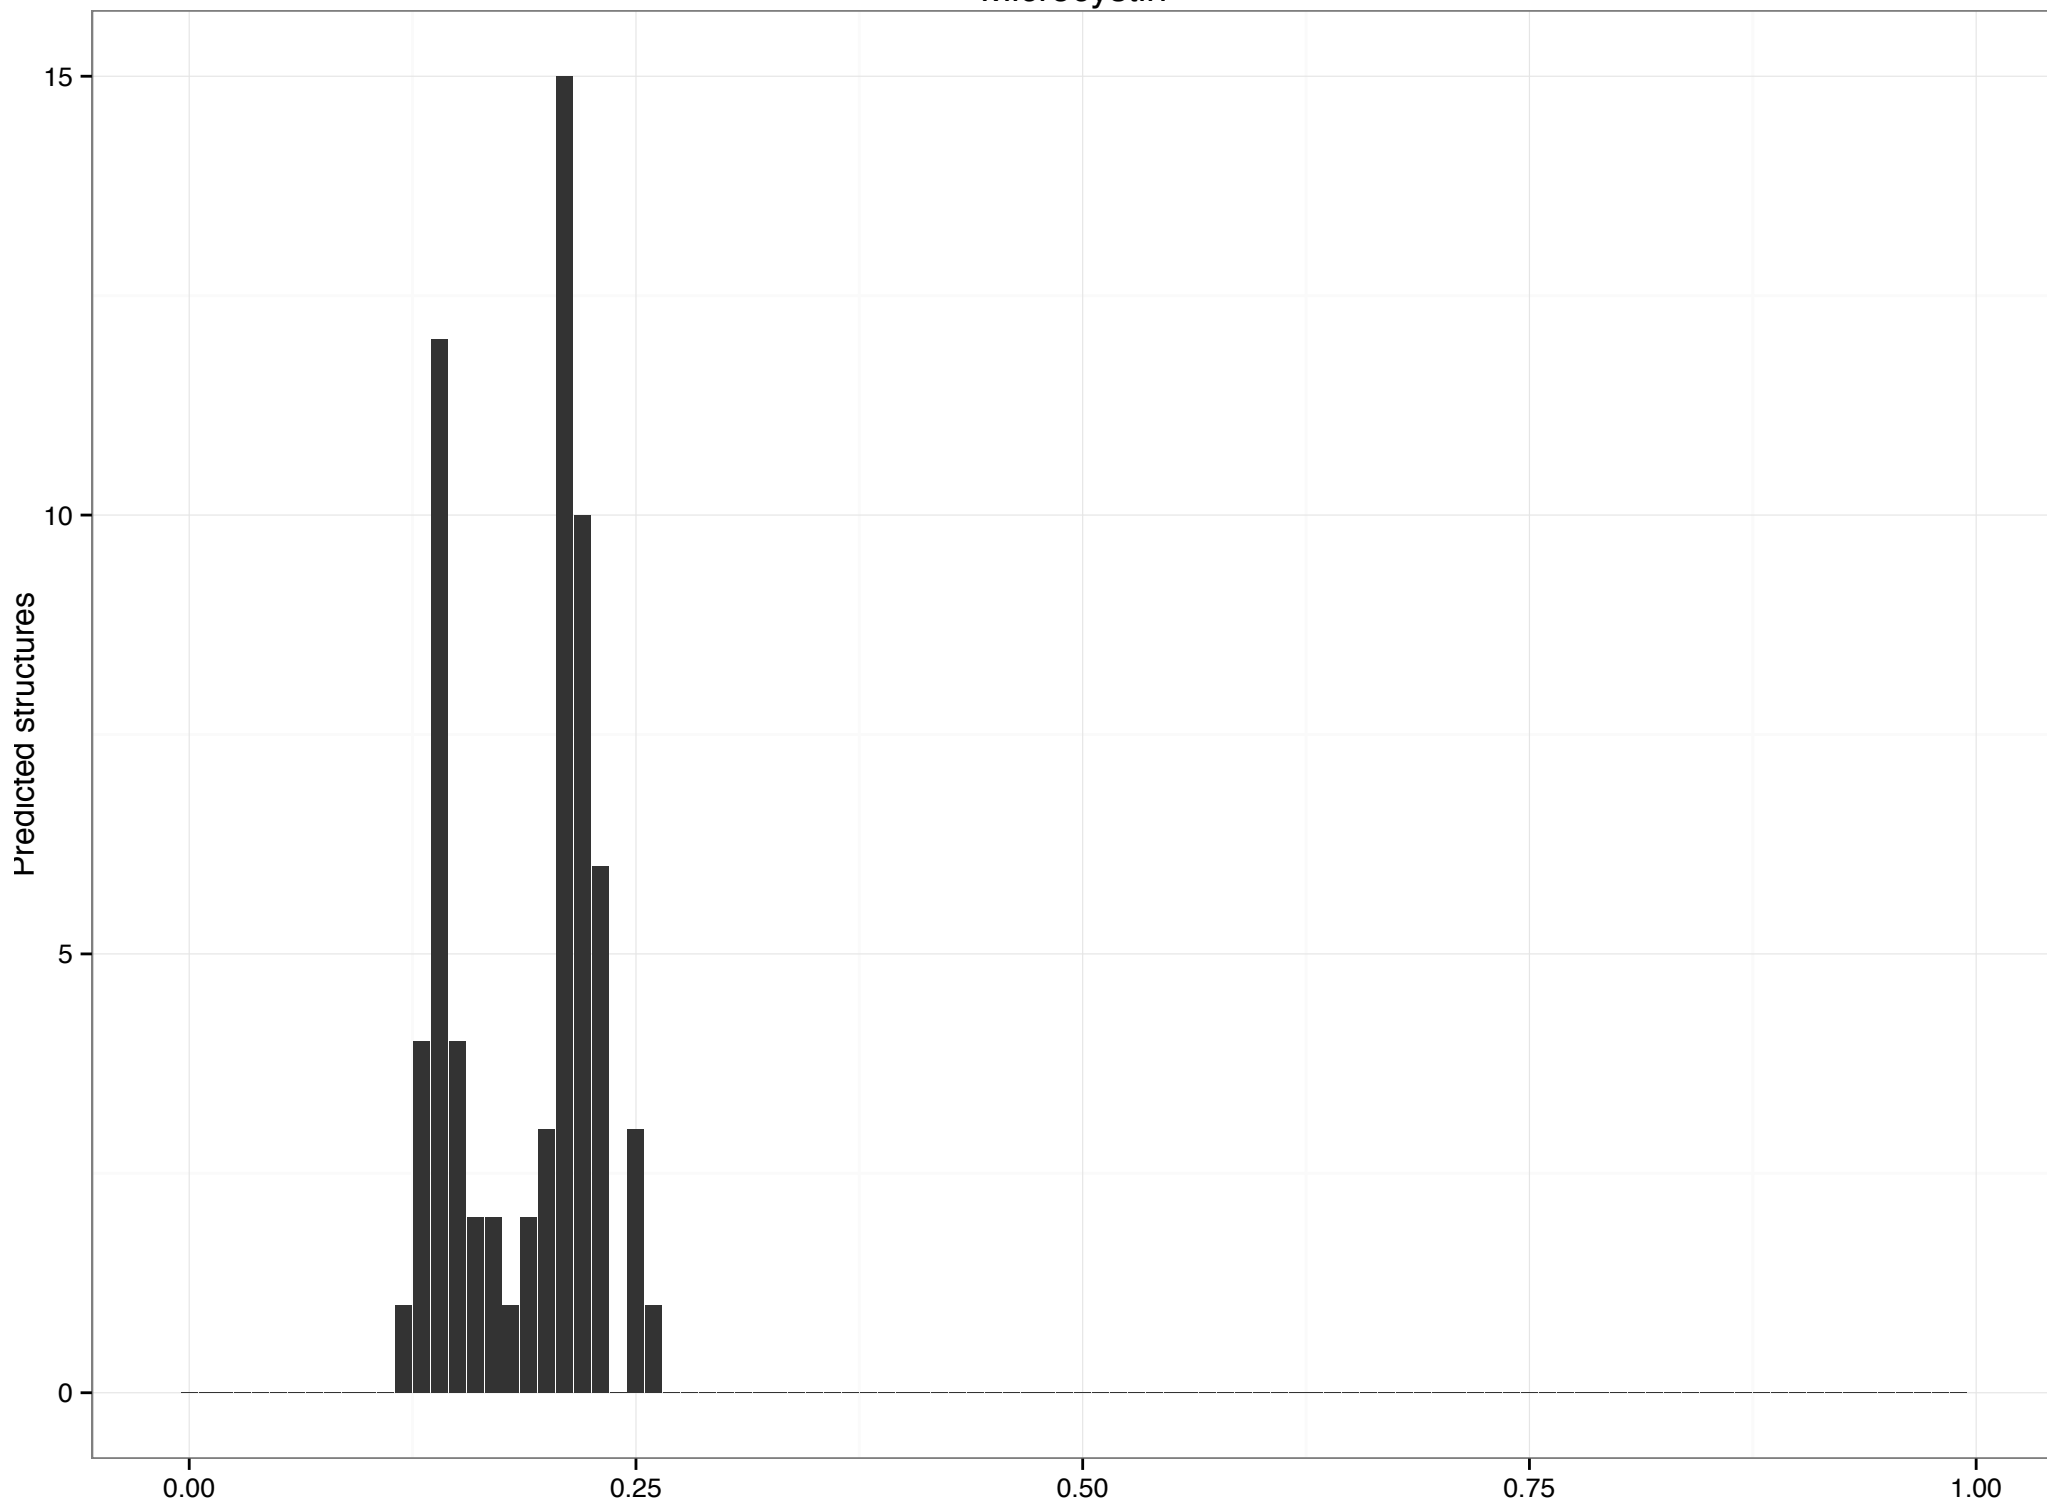

# ML-449

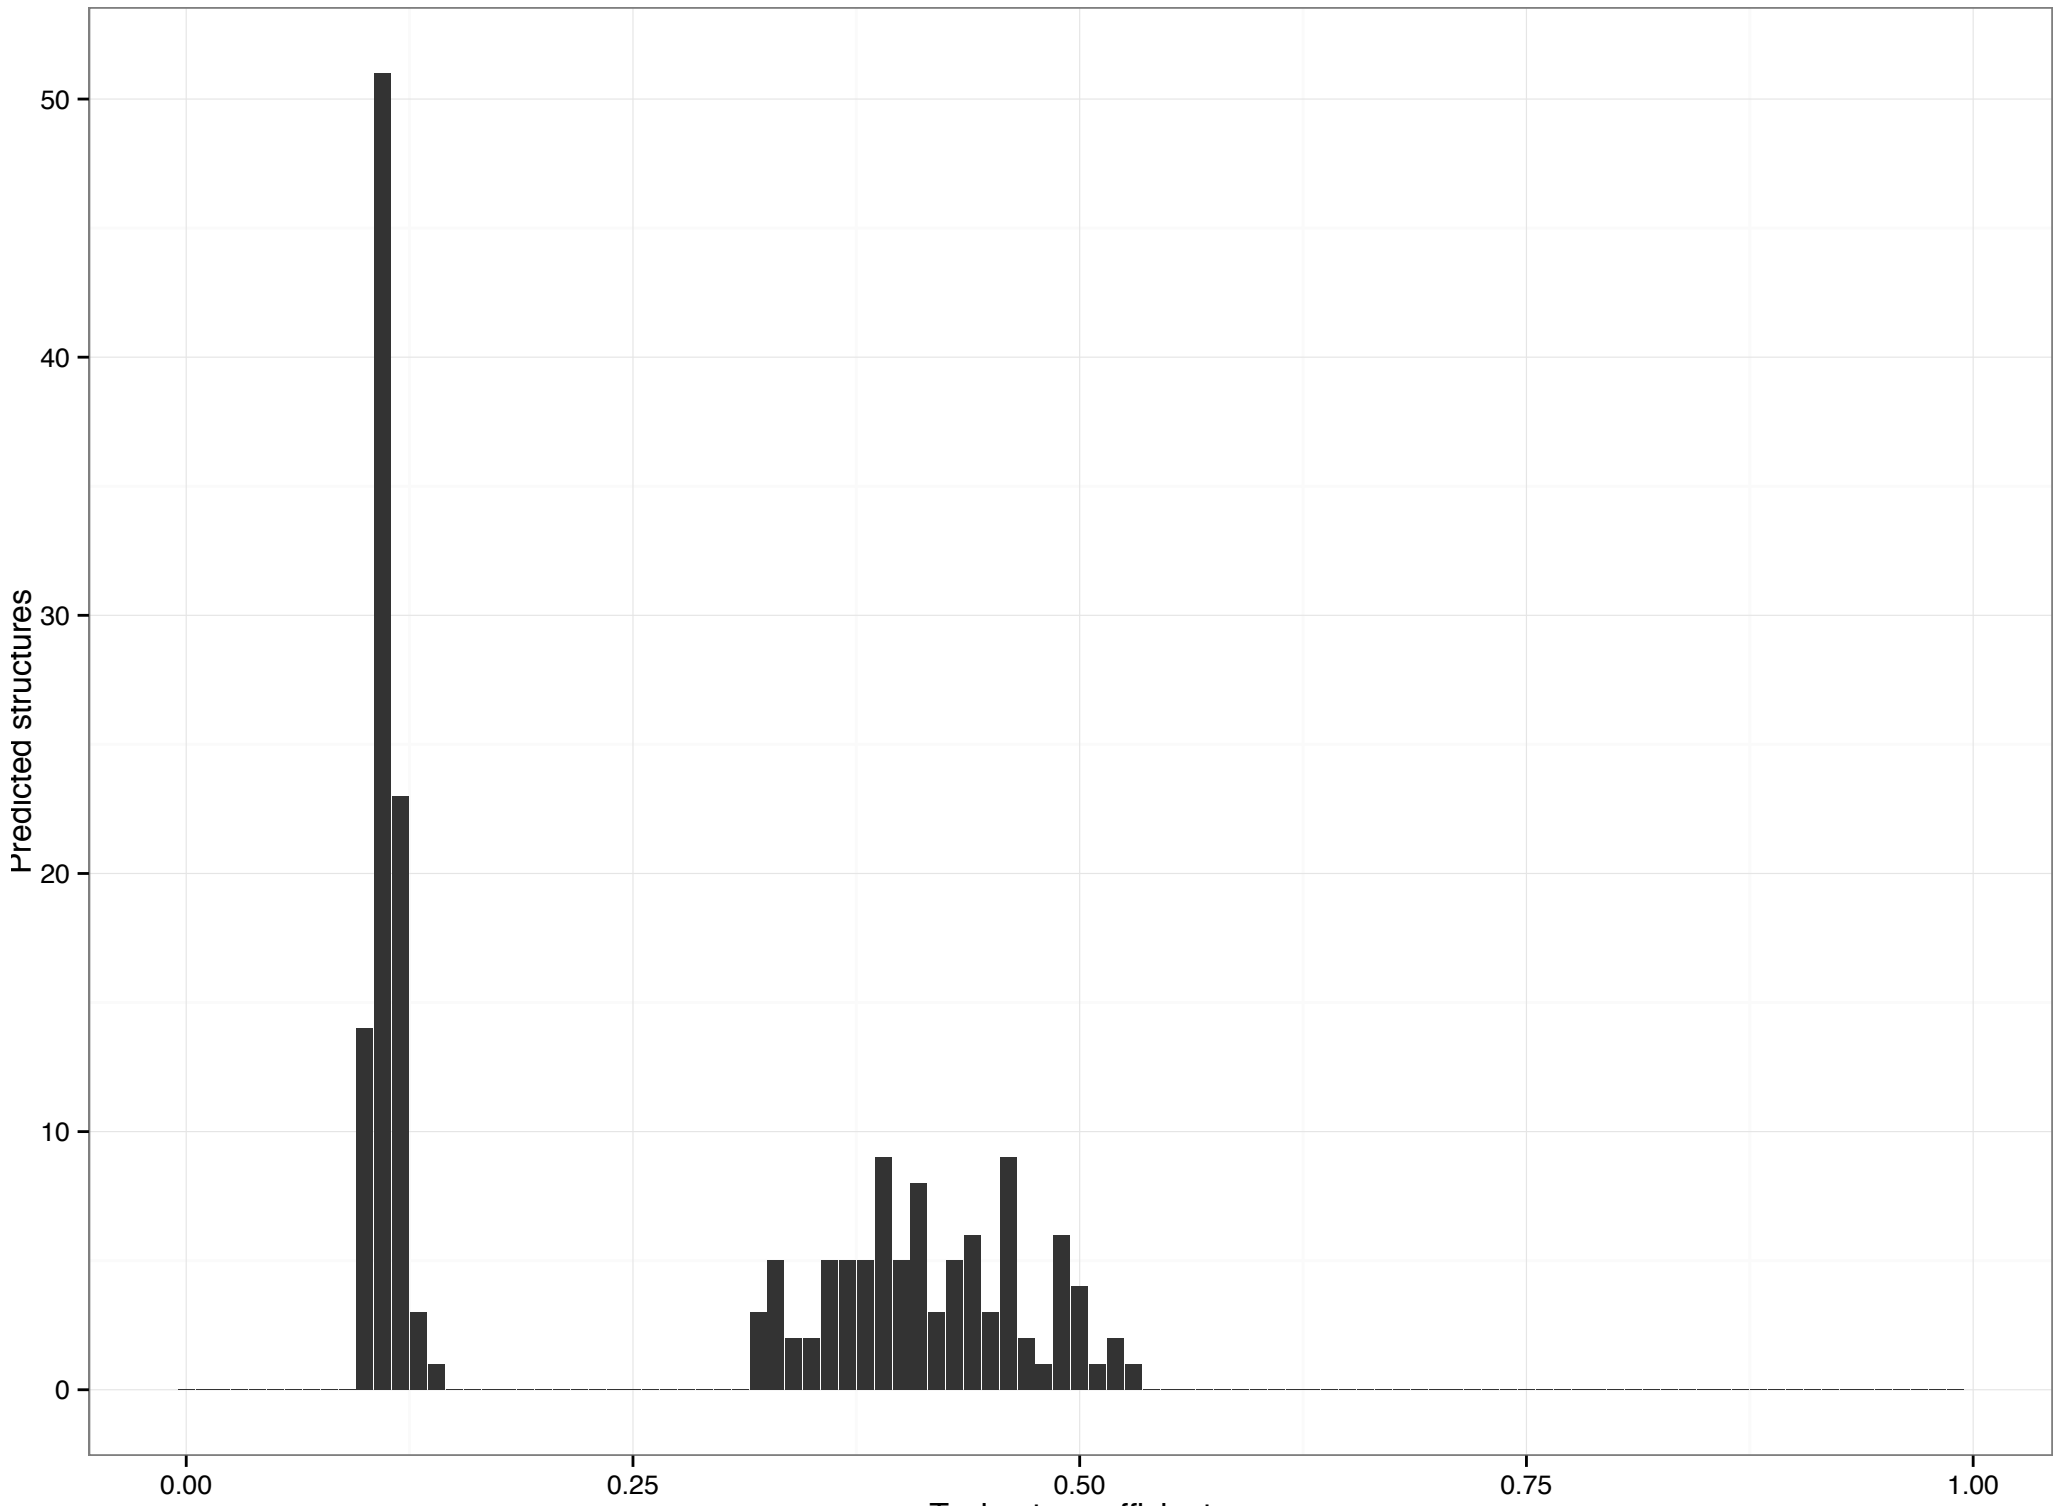

# Natamycin

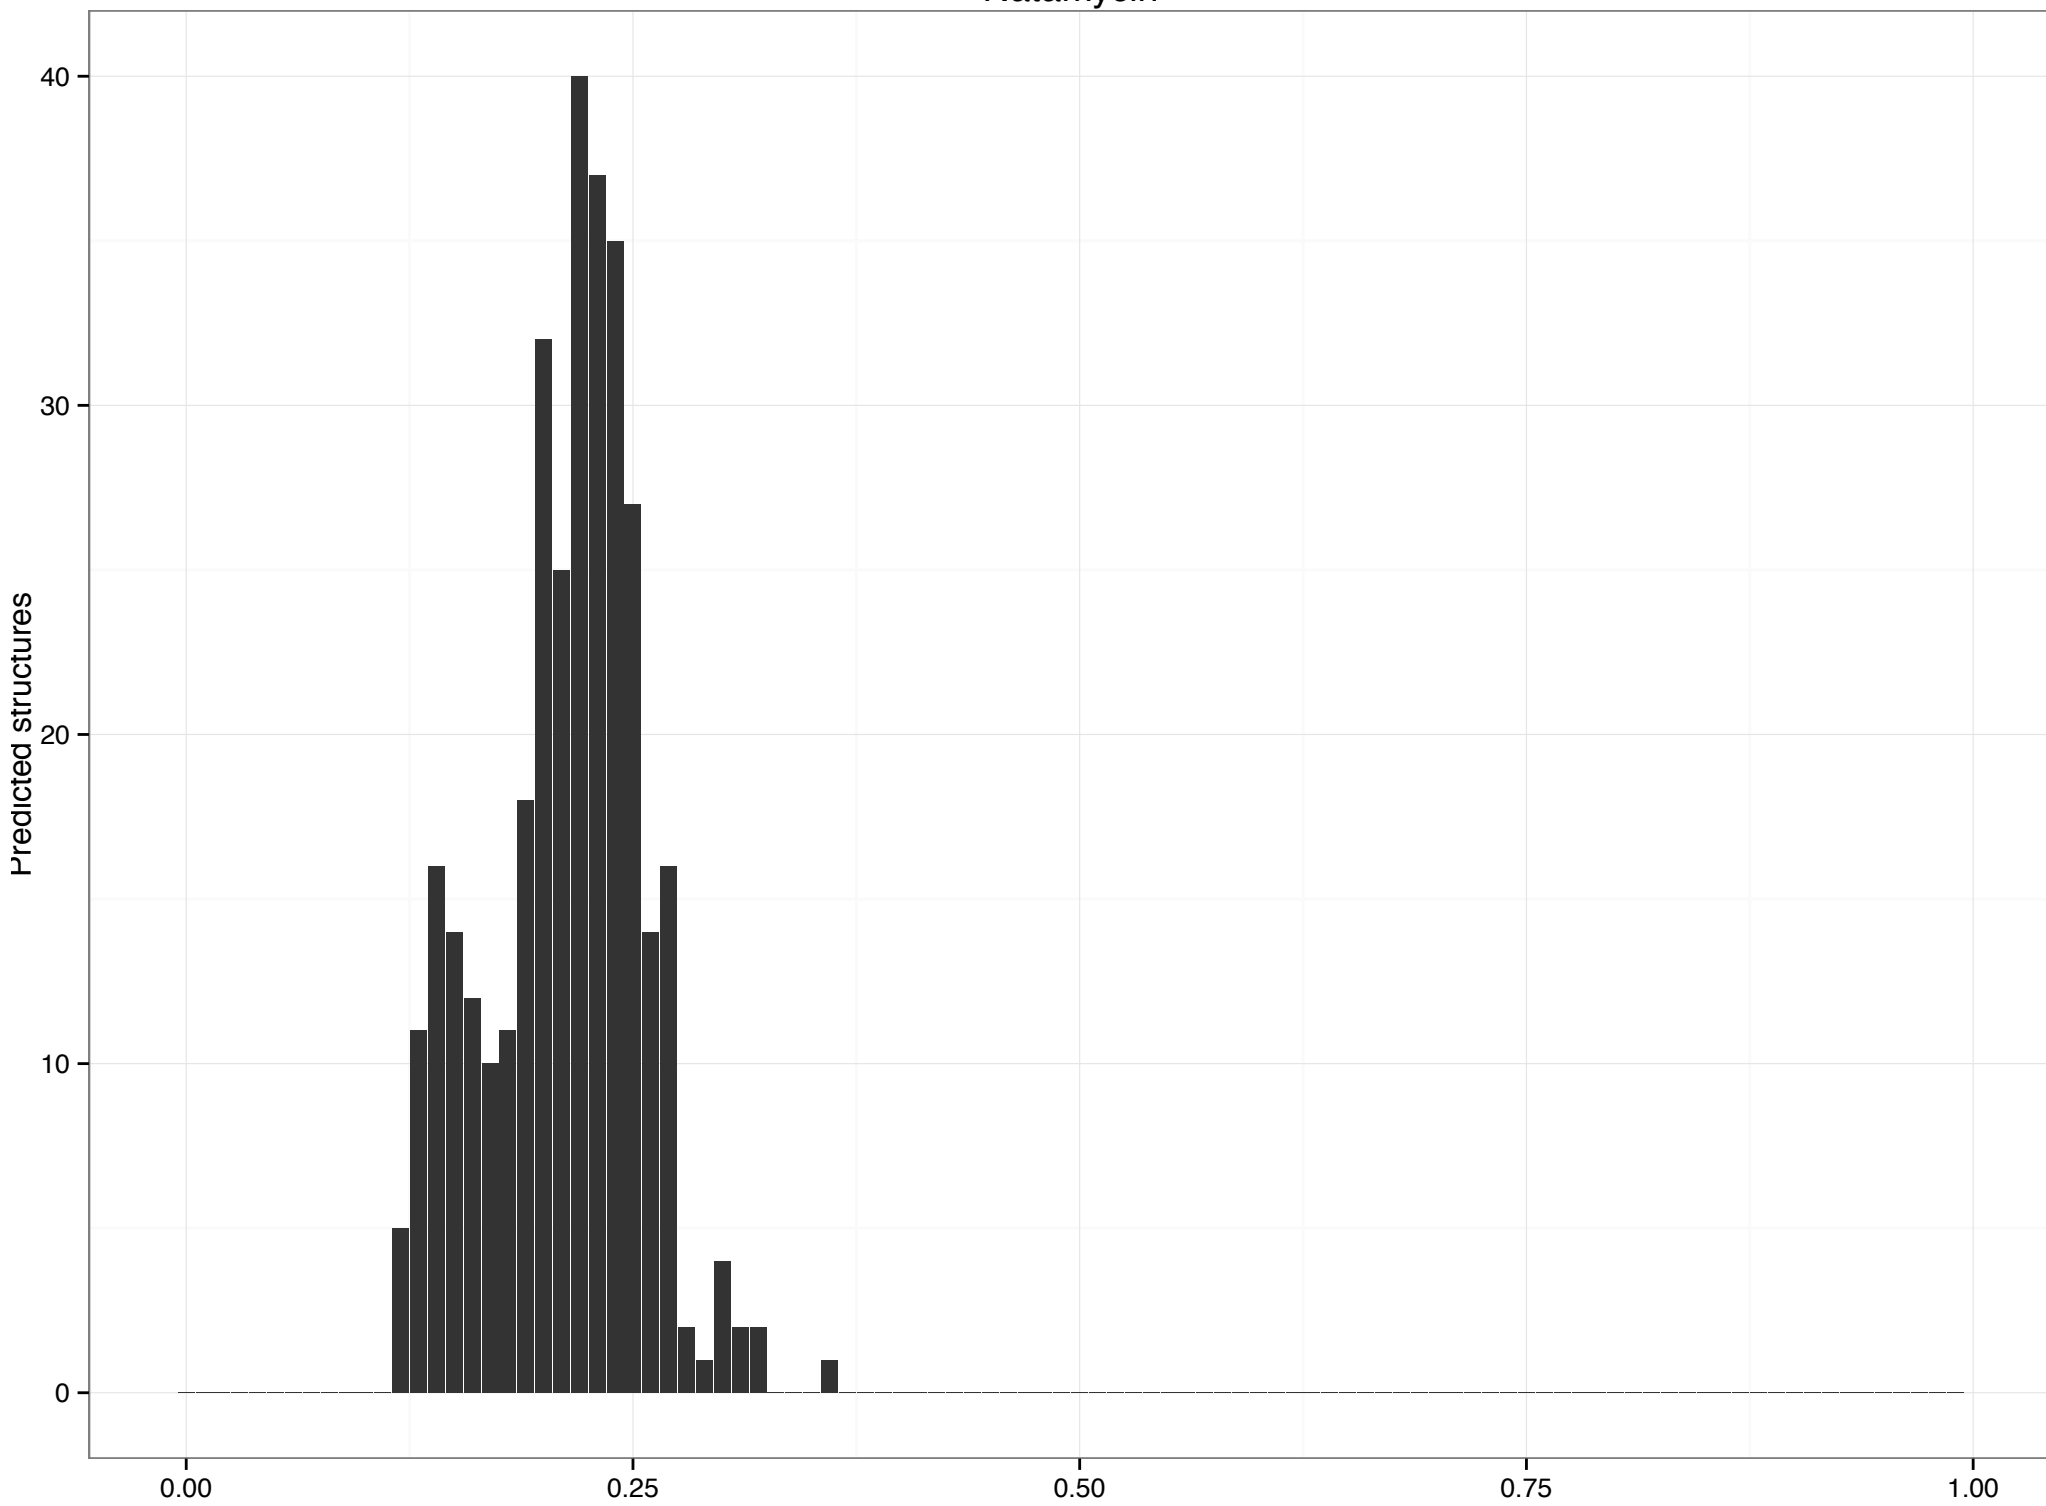

# Nystatin

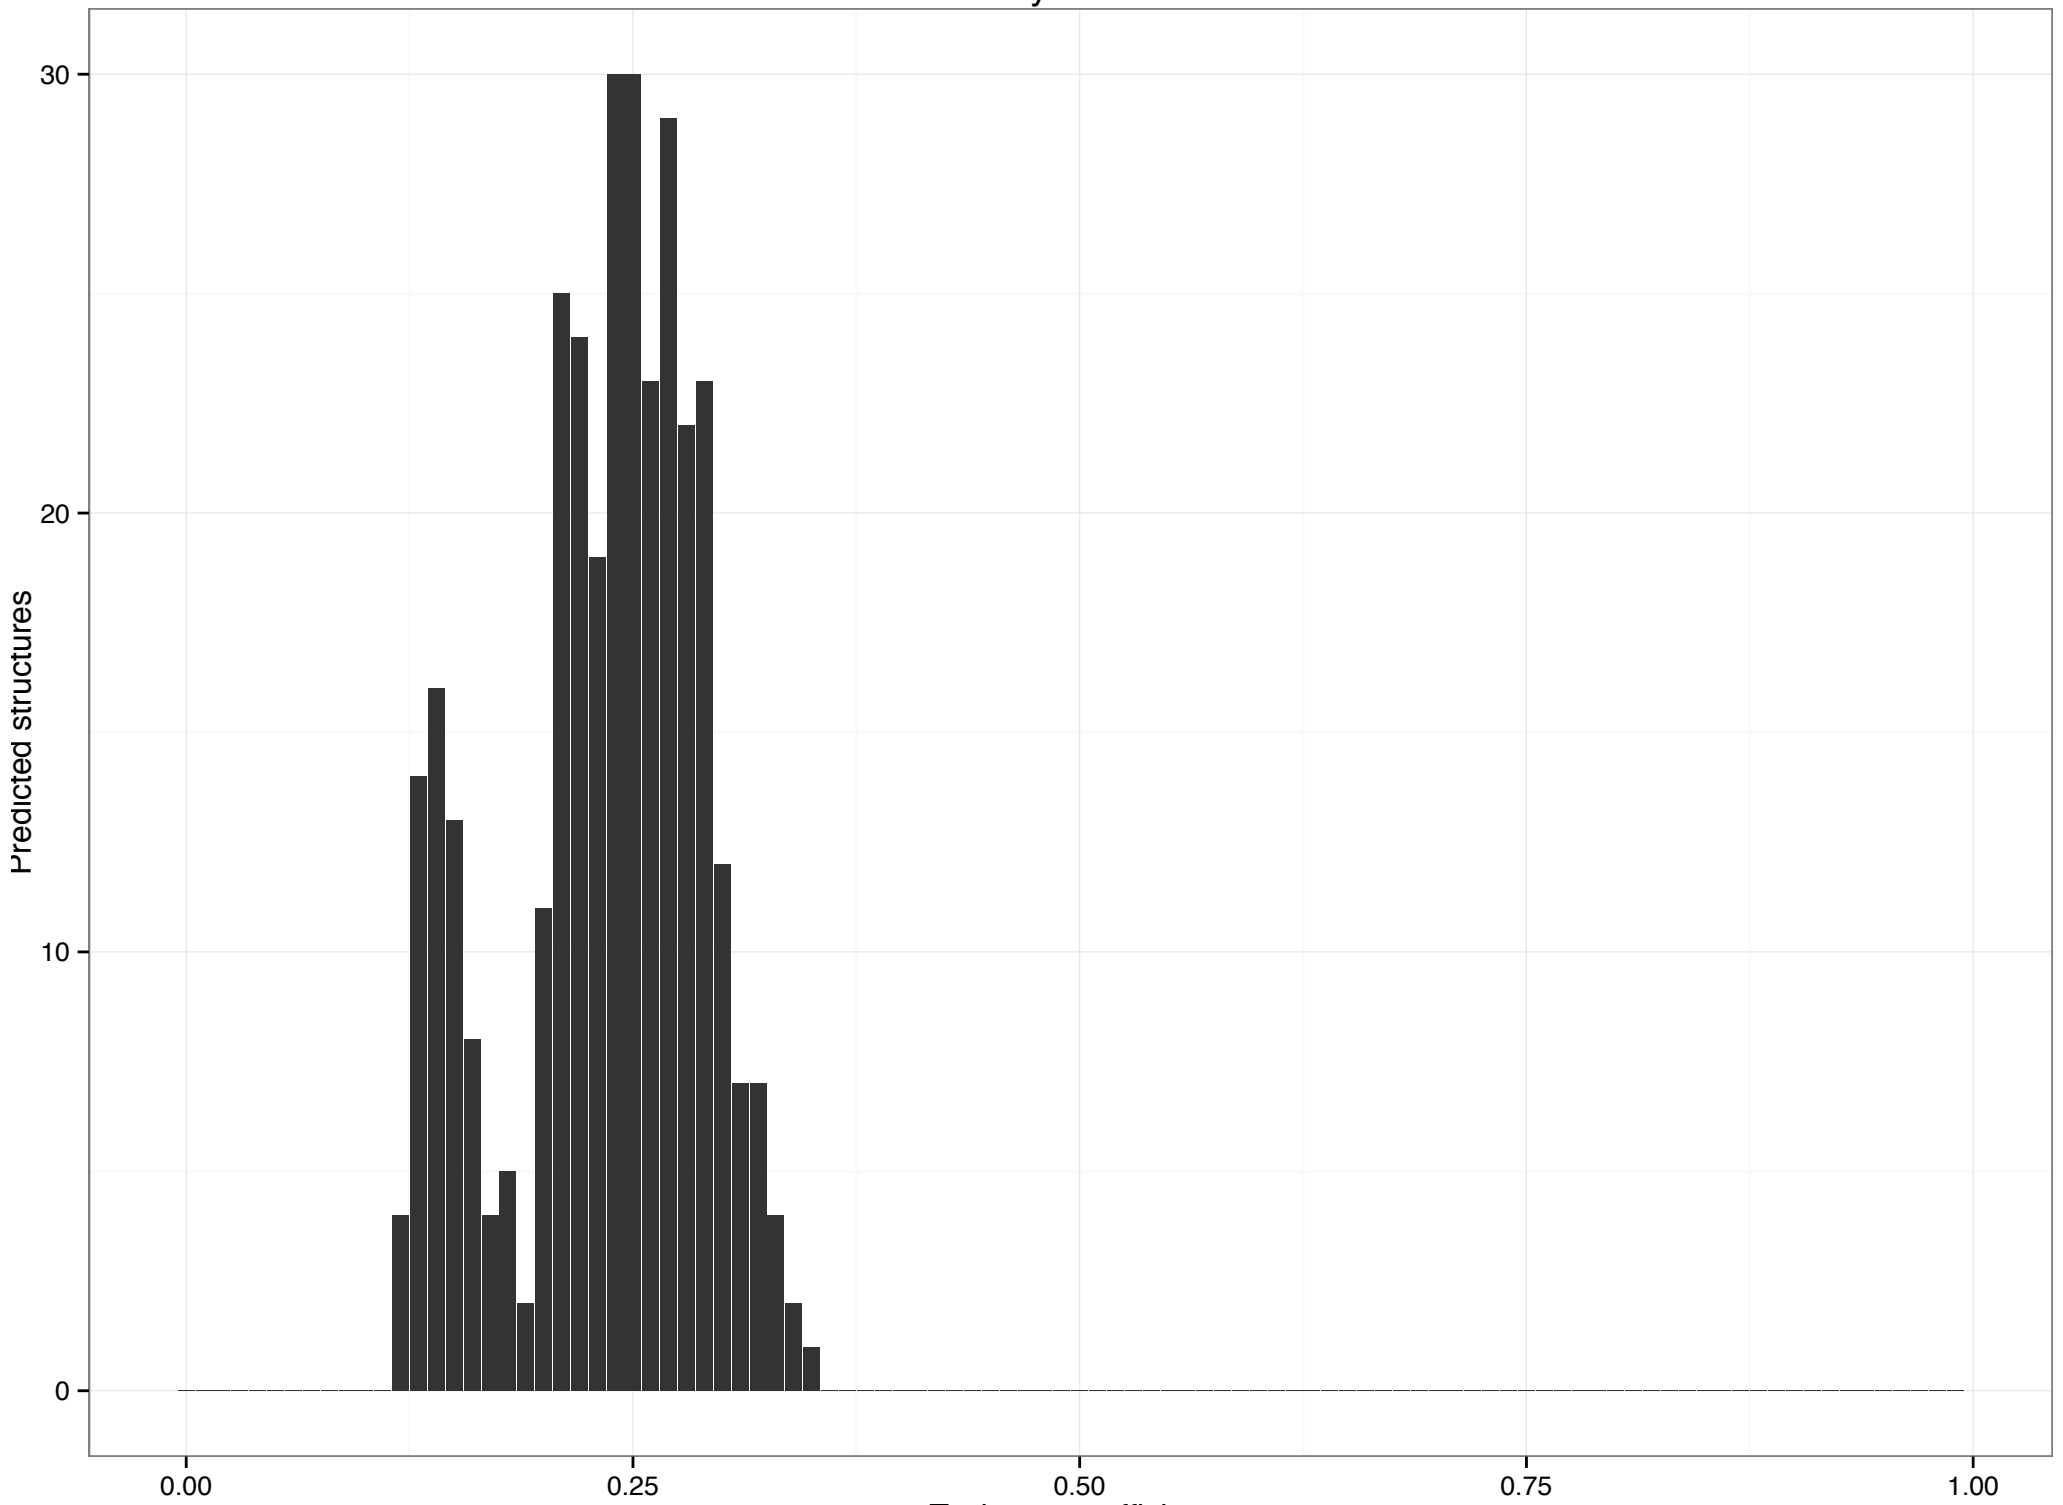

# Oligomycin

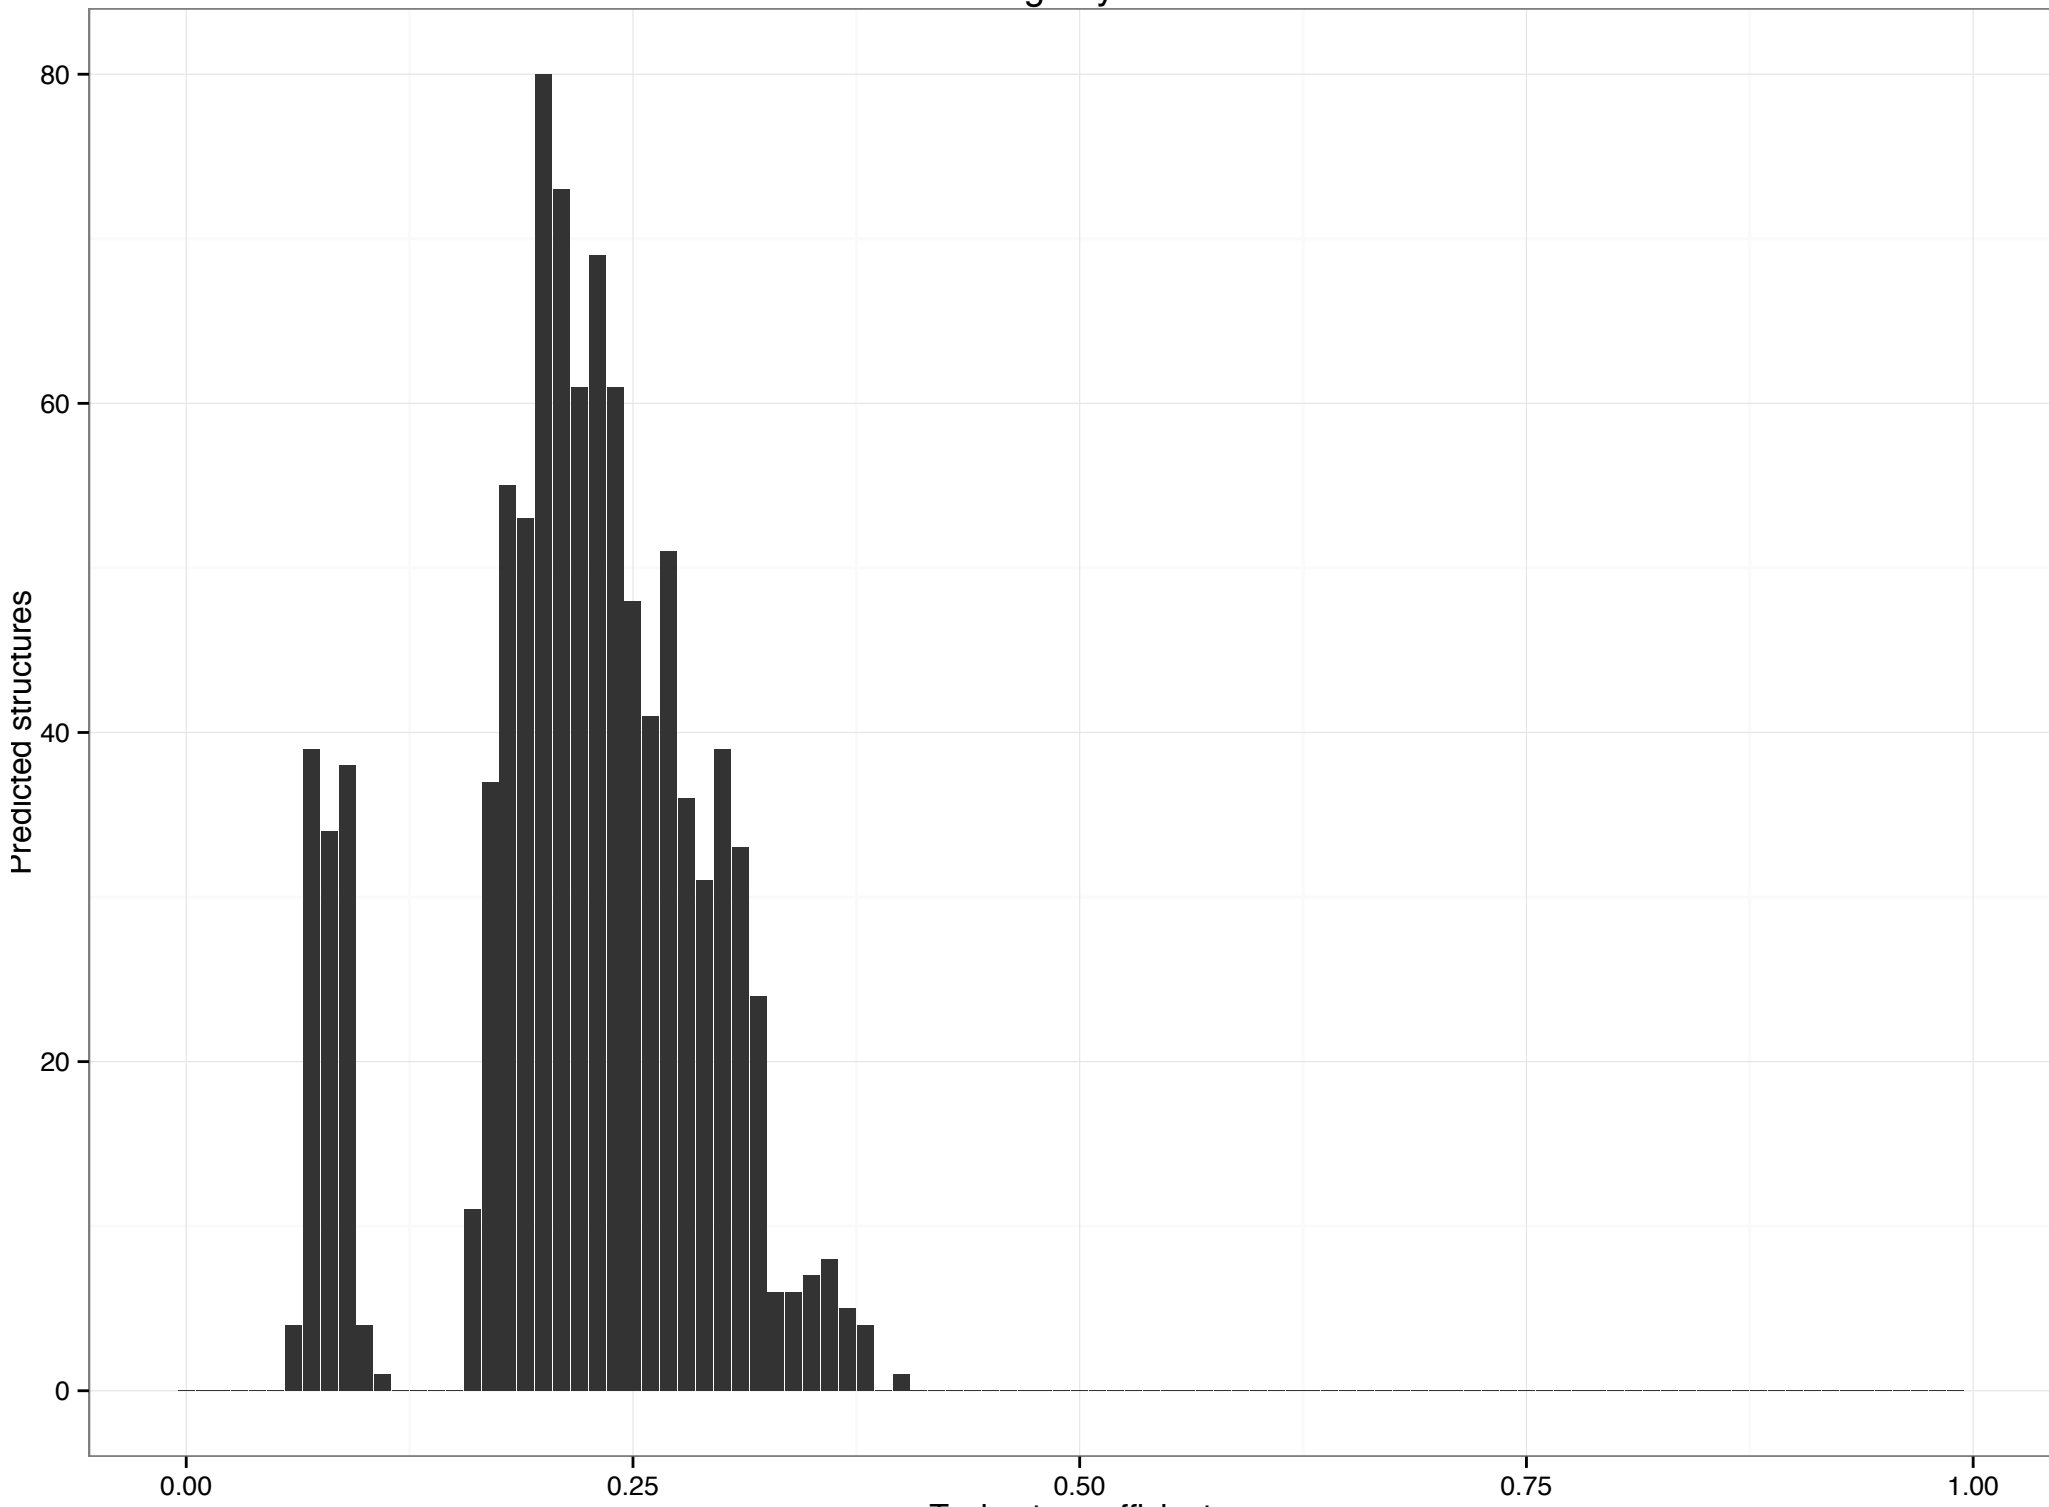

# Pimaricin

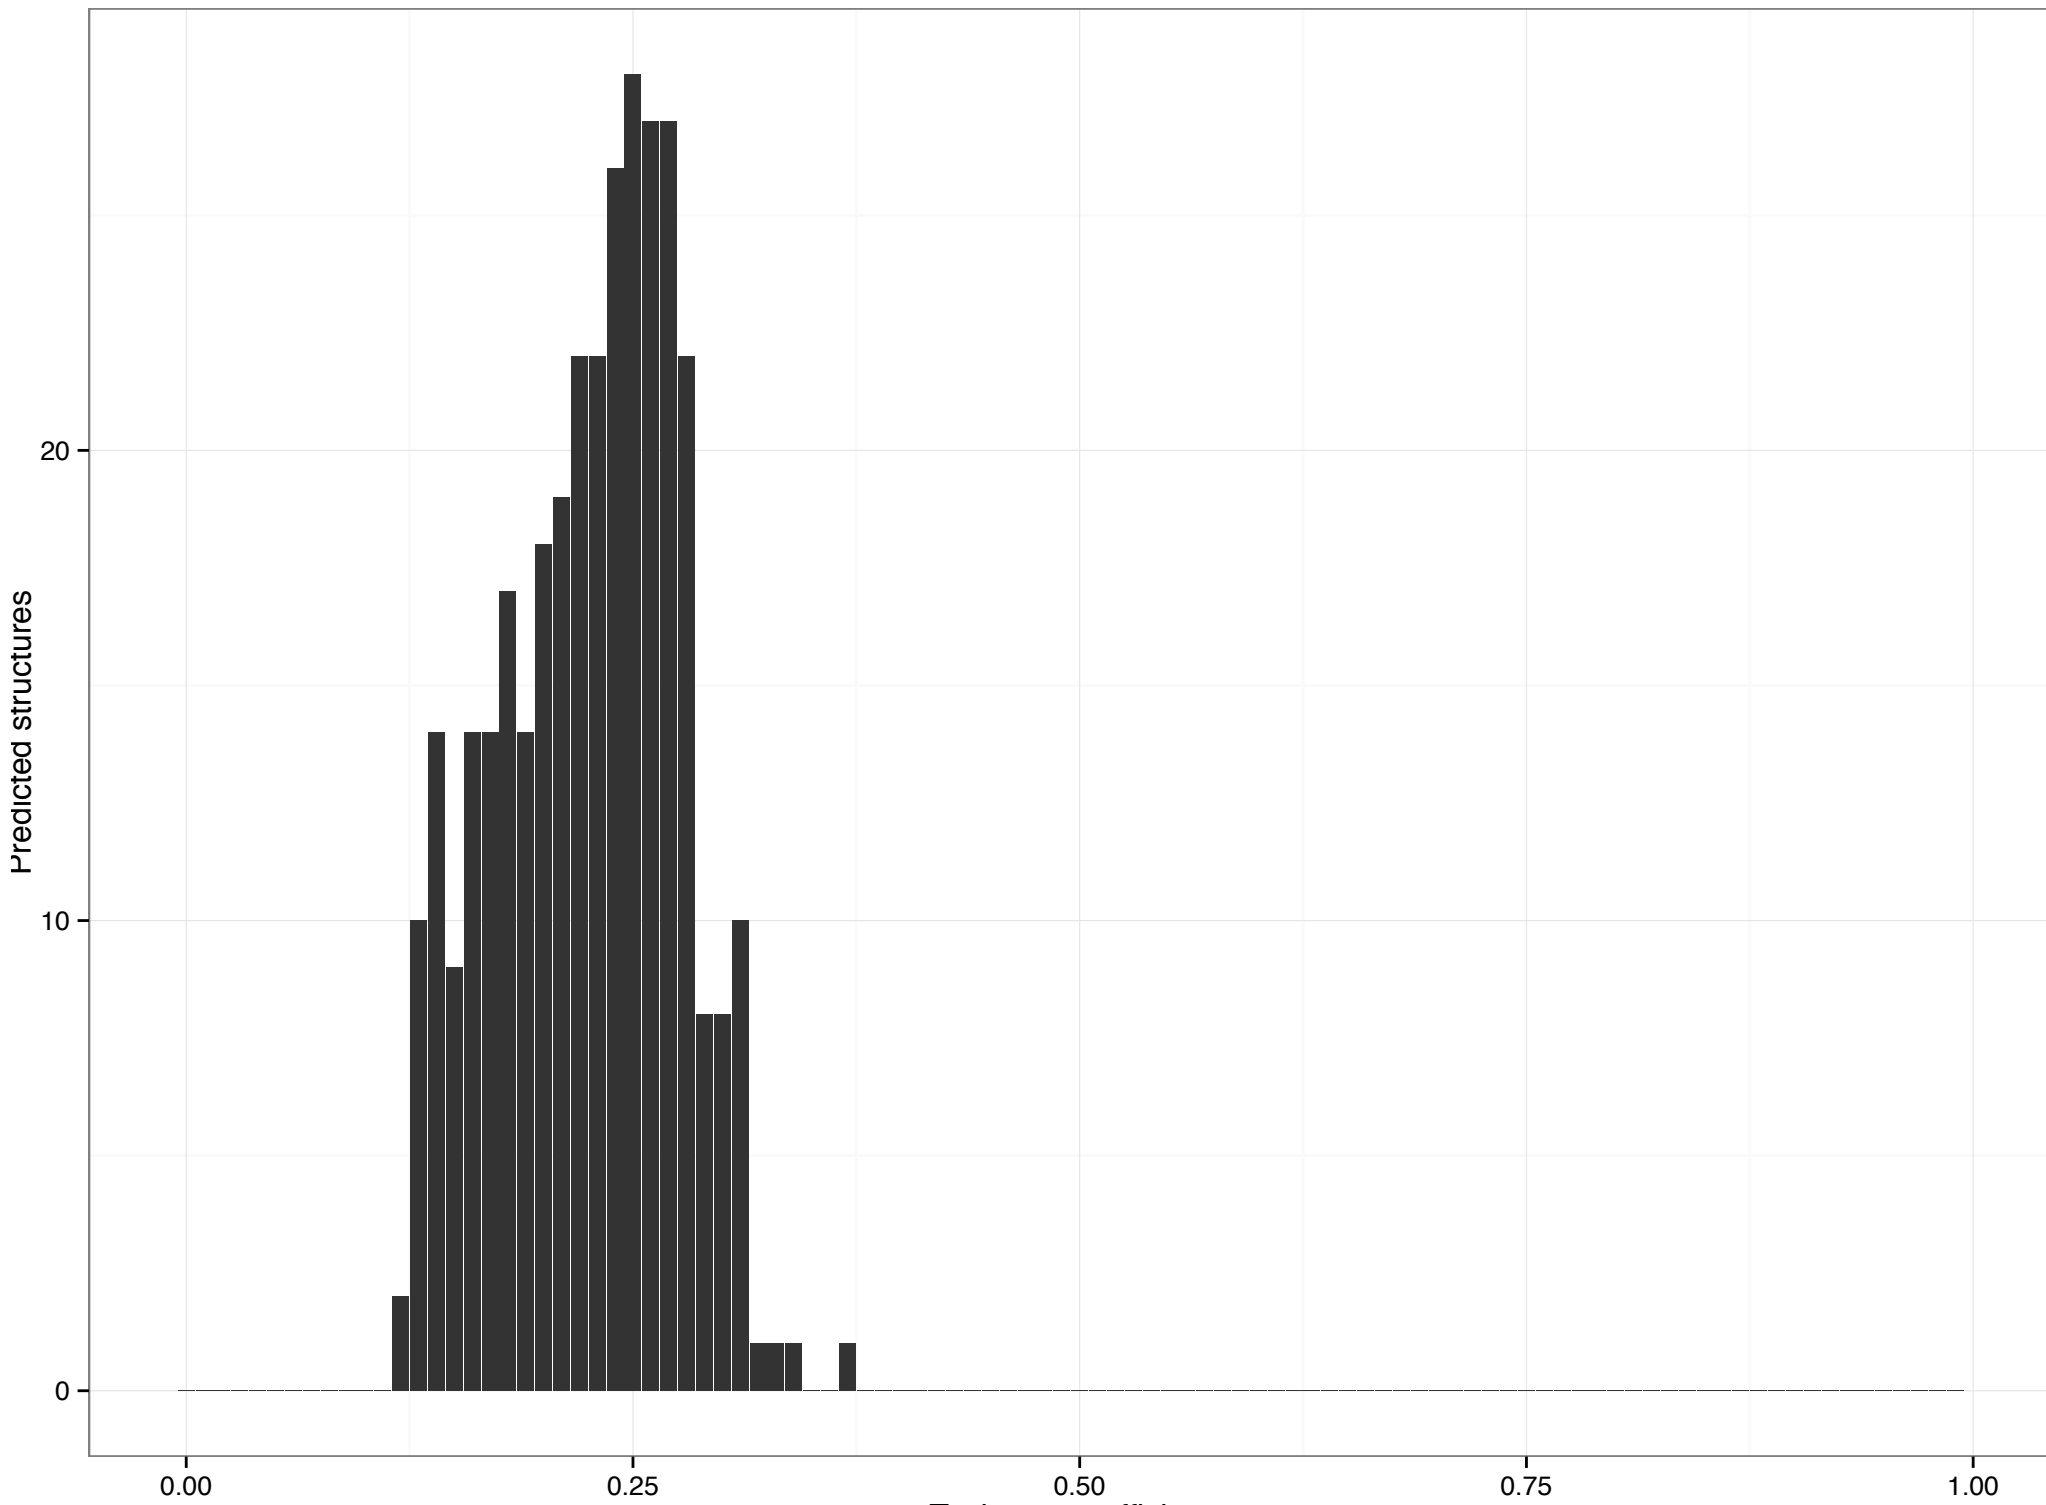



# Ramoplanin

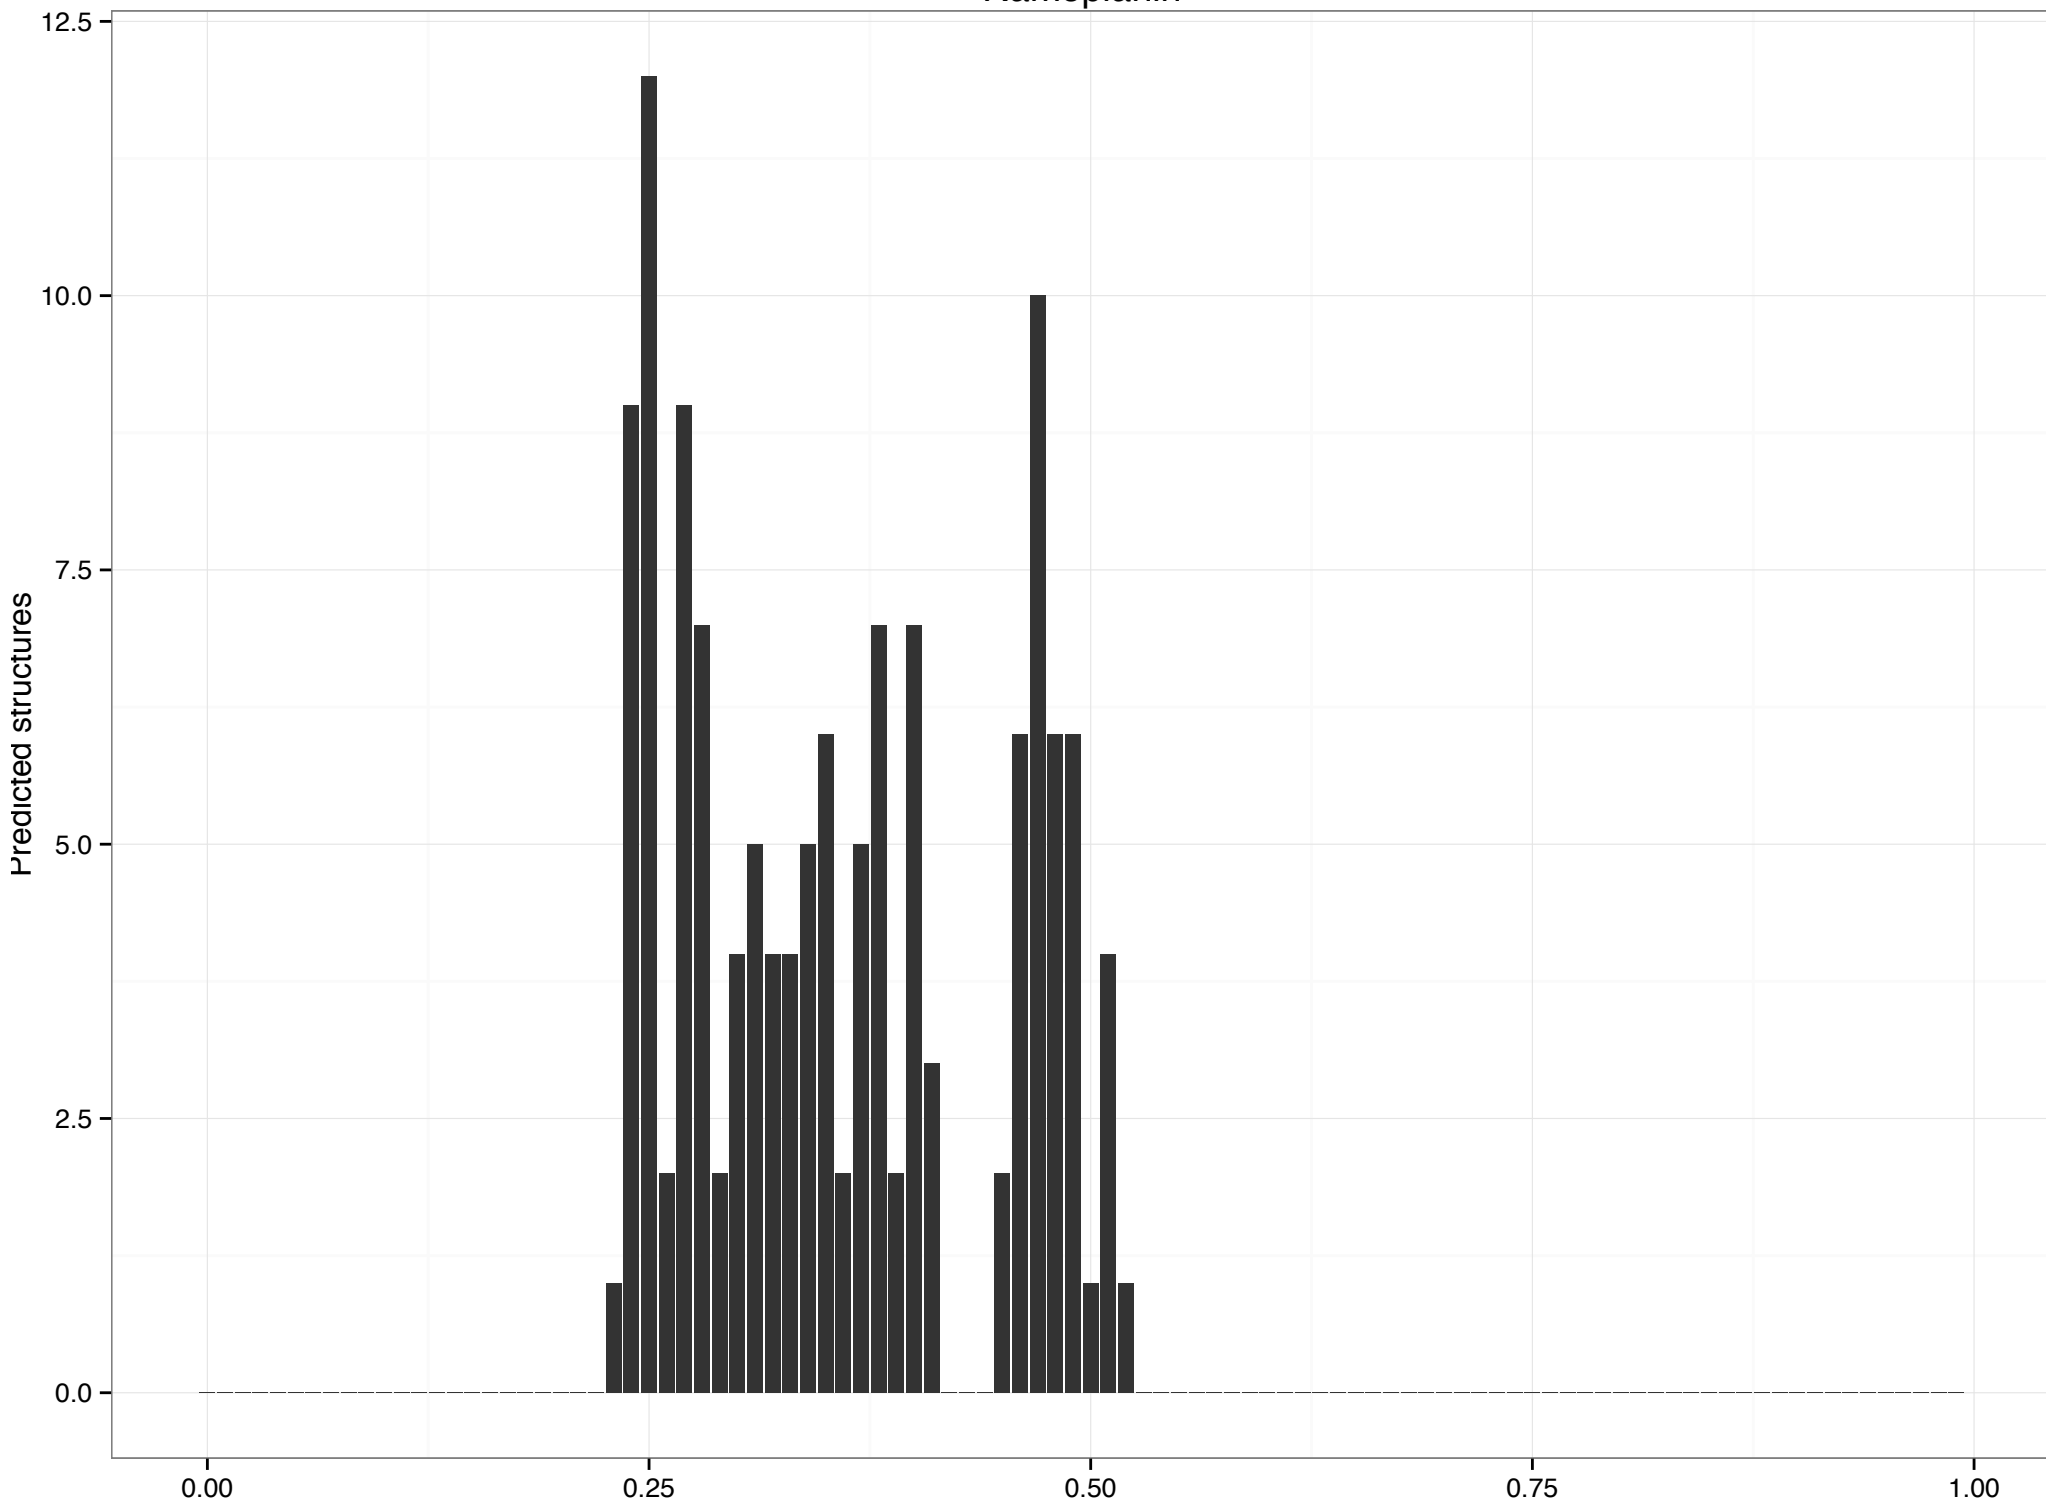

# Ristocetin

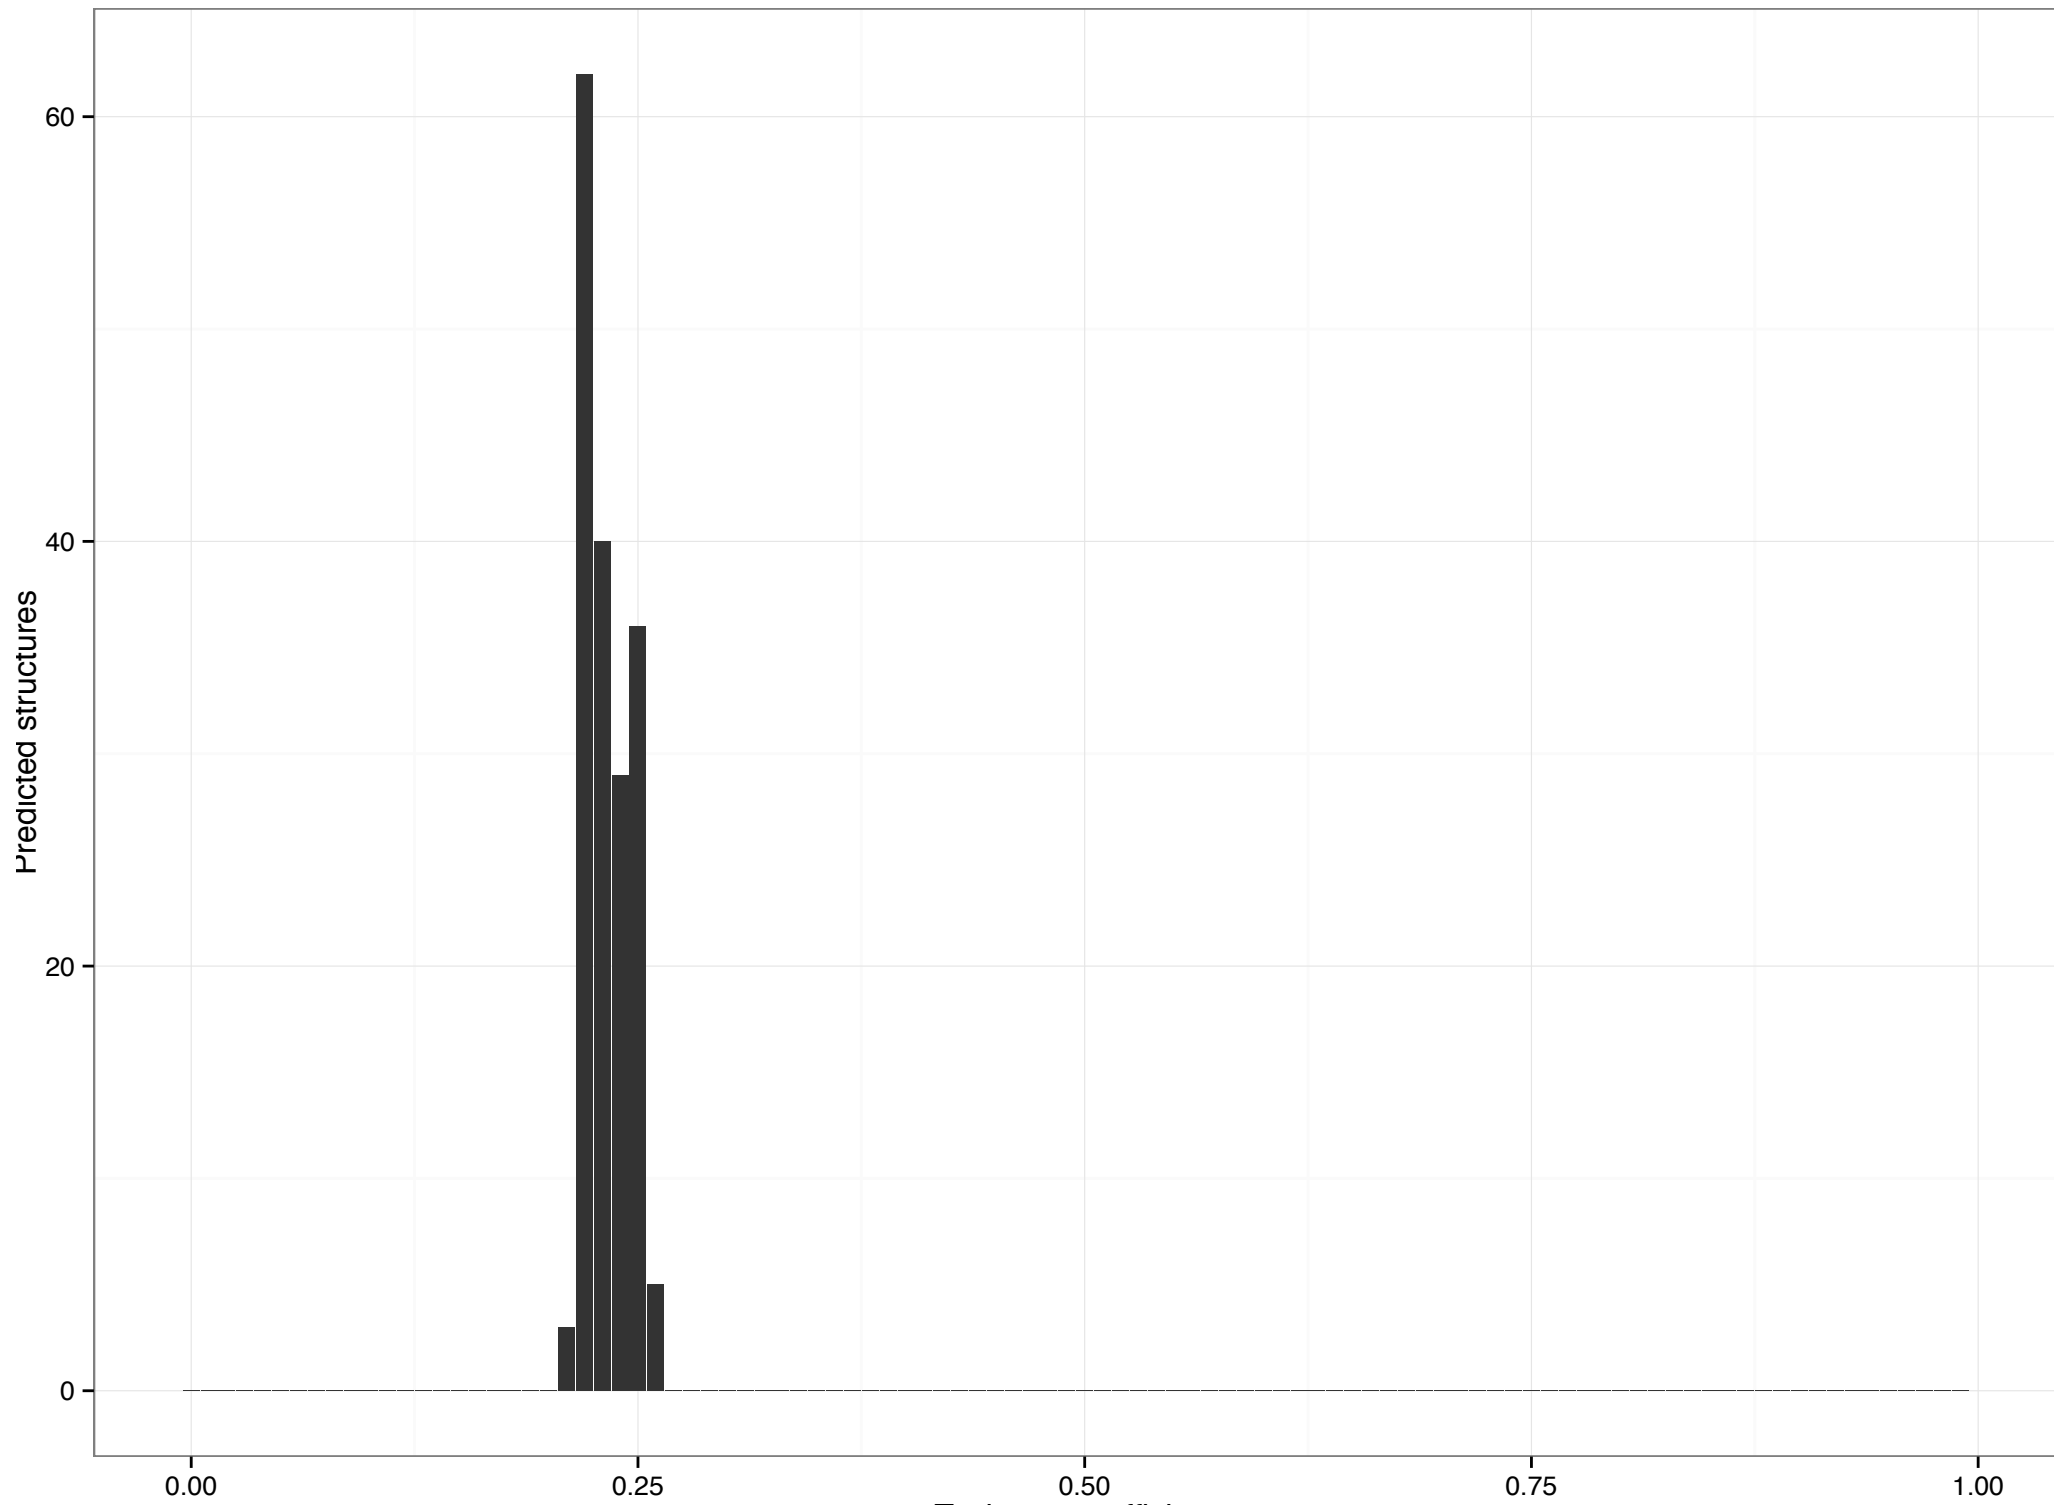

# Tallysomycin

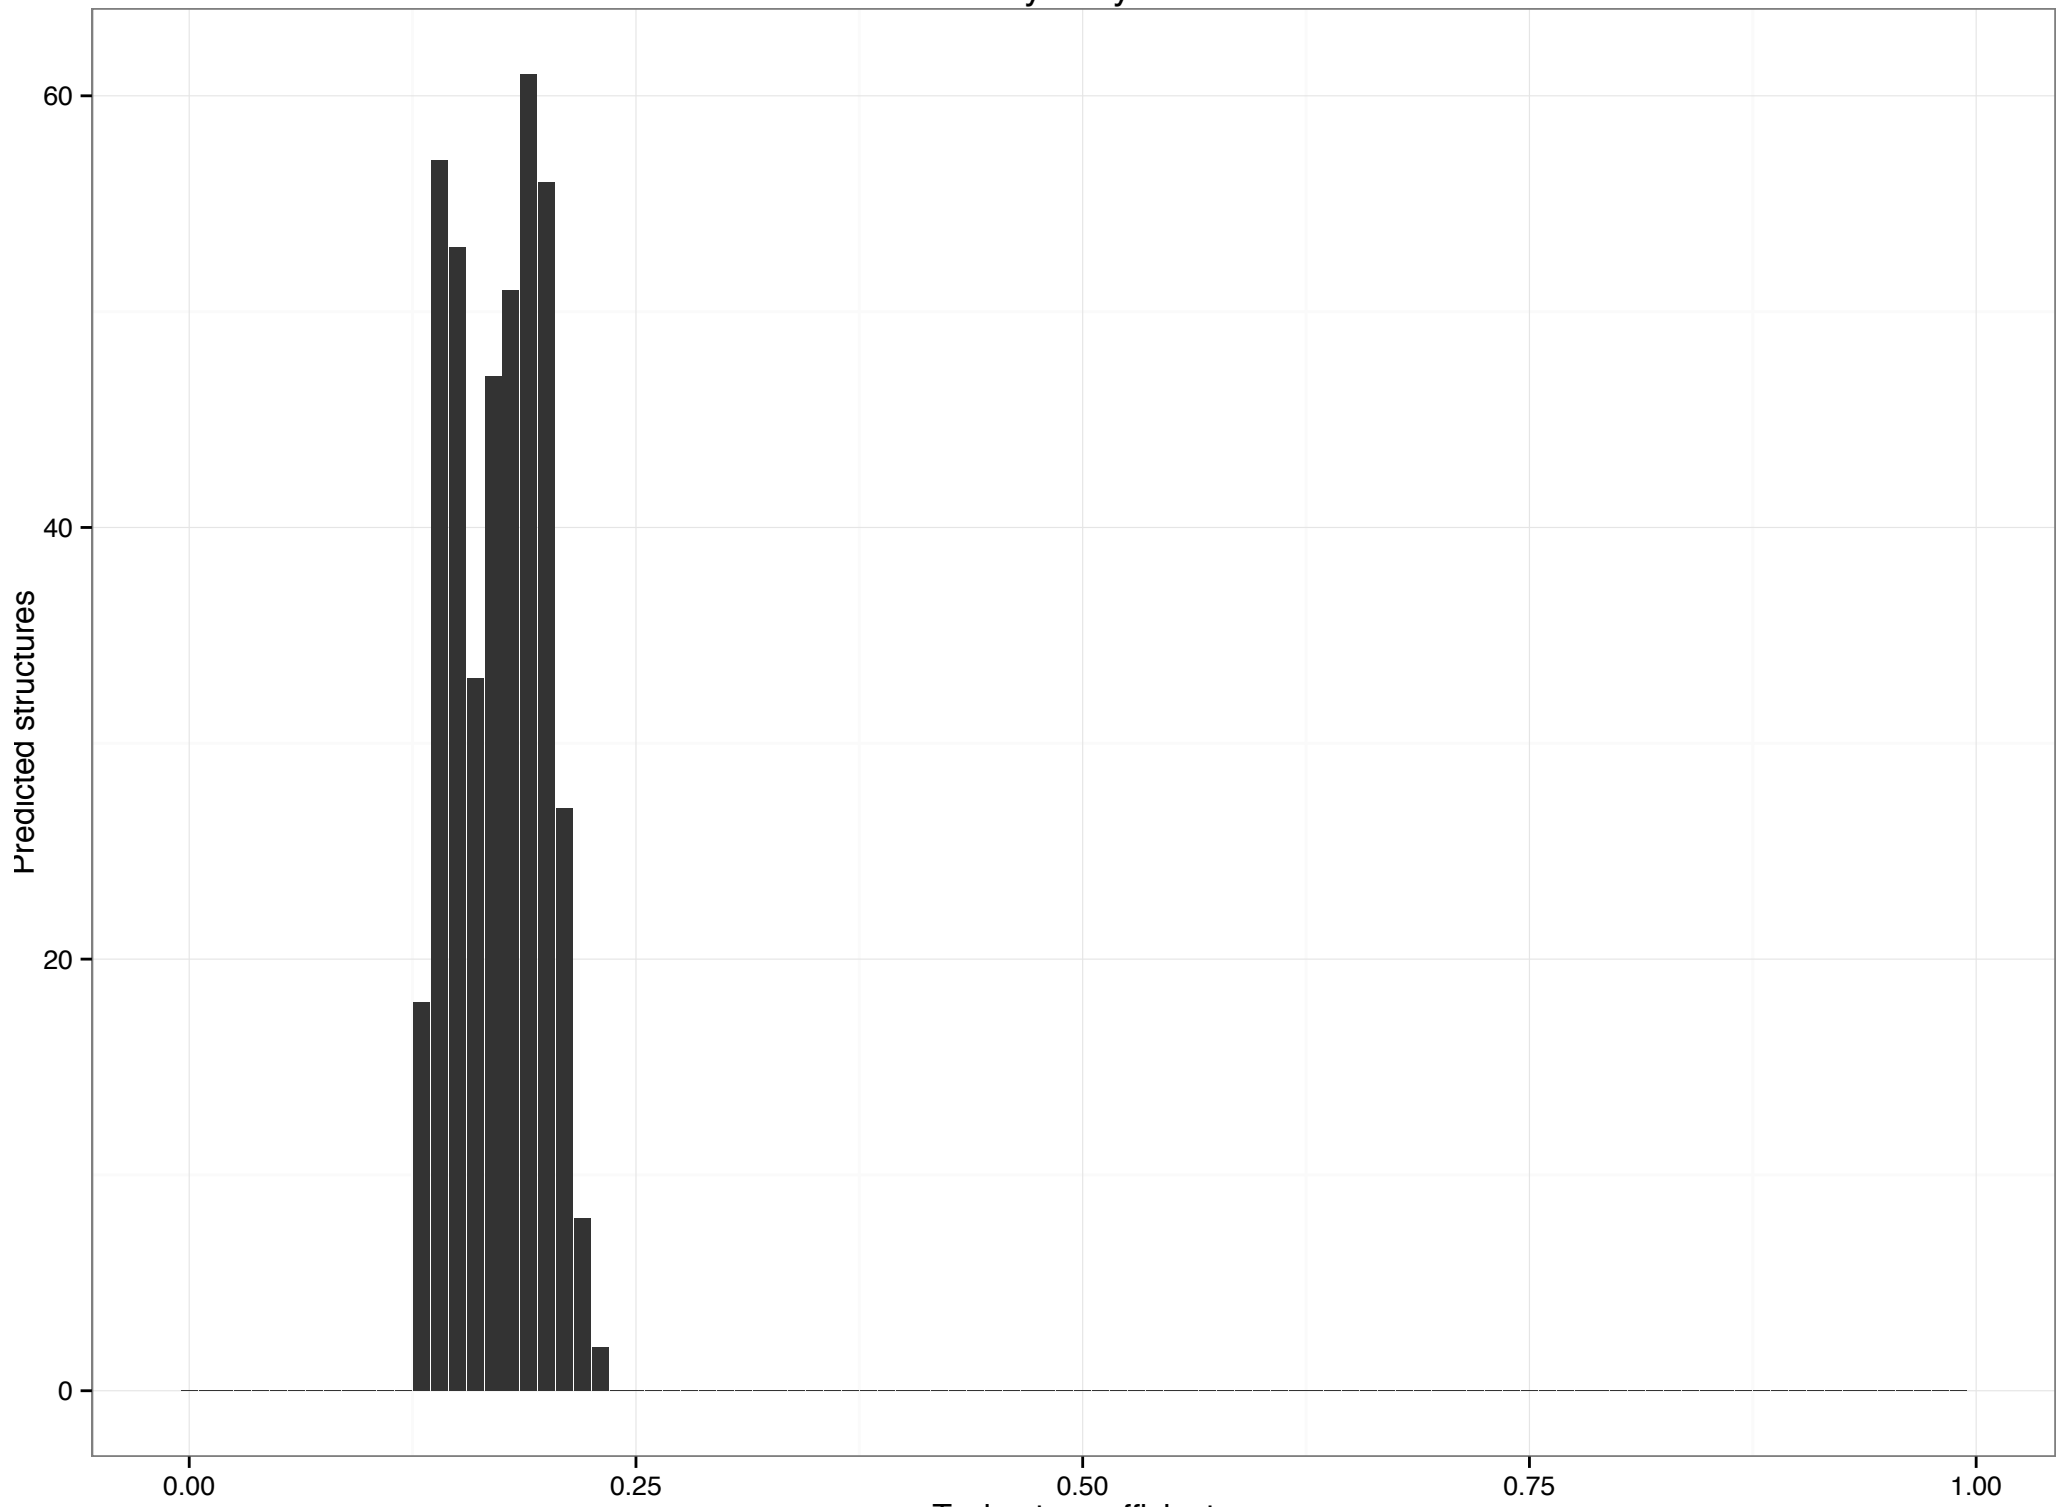

# Teicoplanin

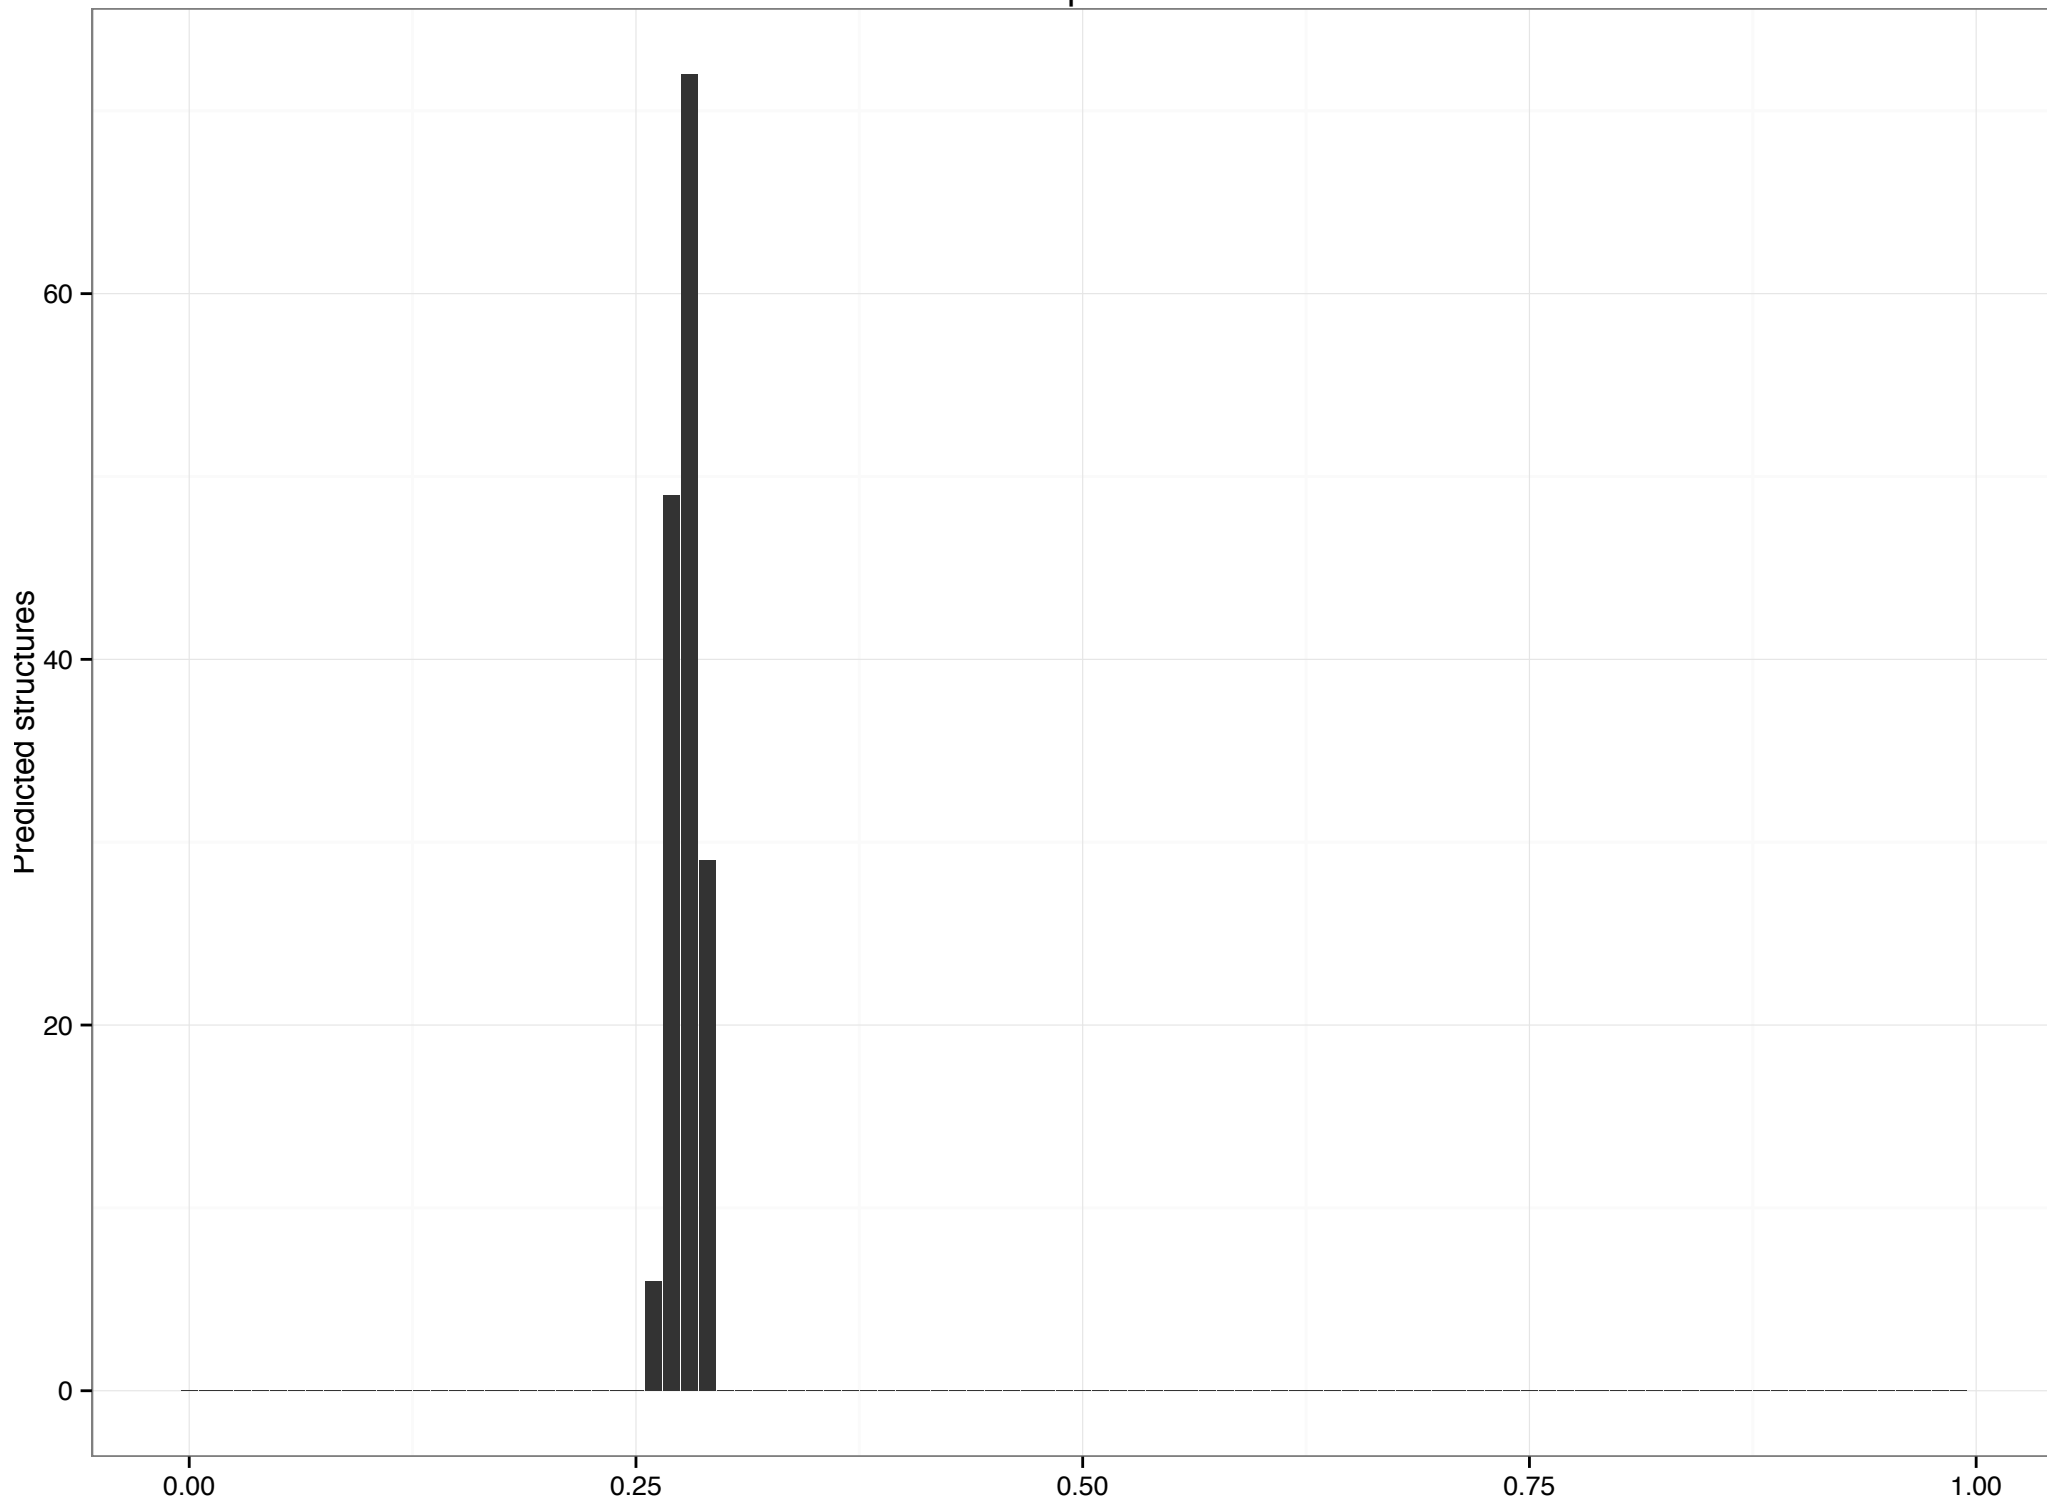

# Tetramycin

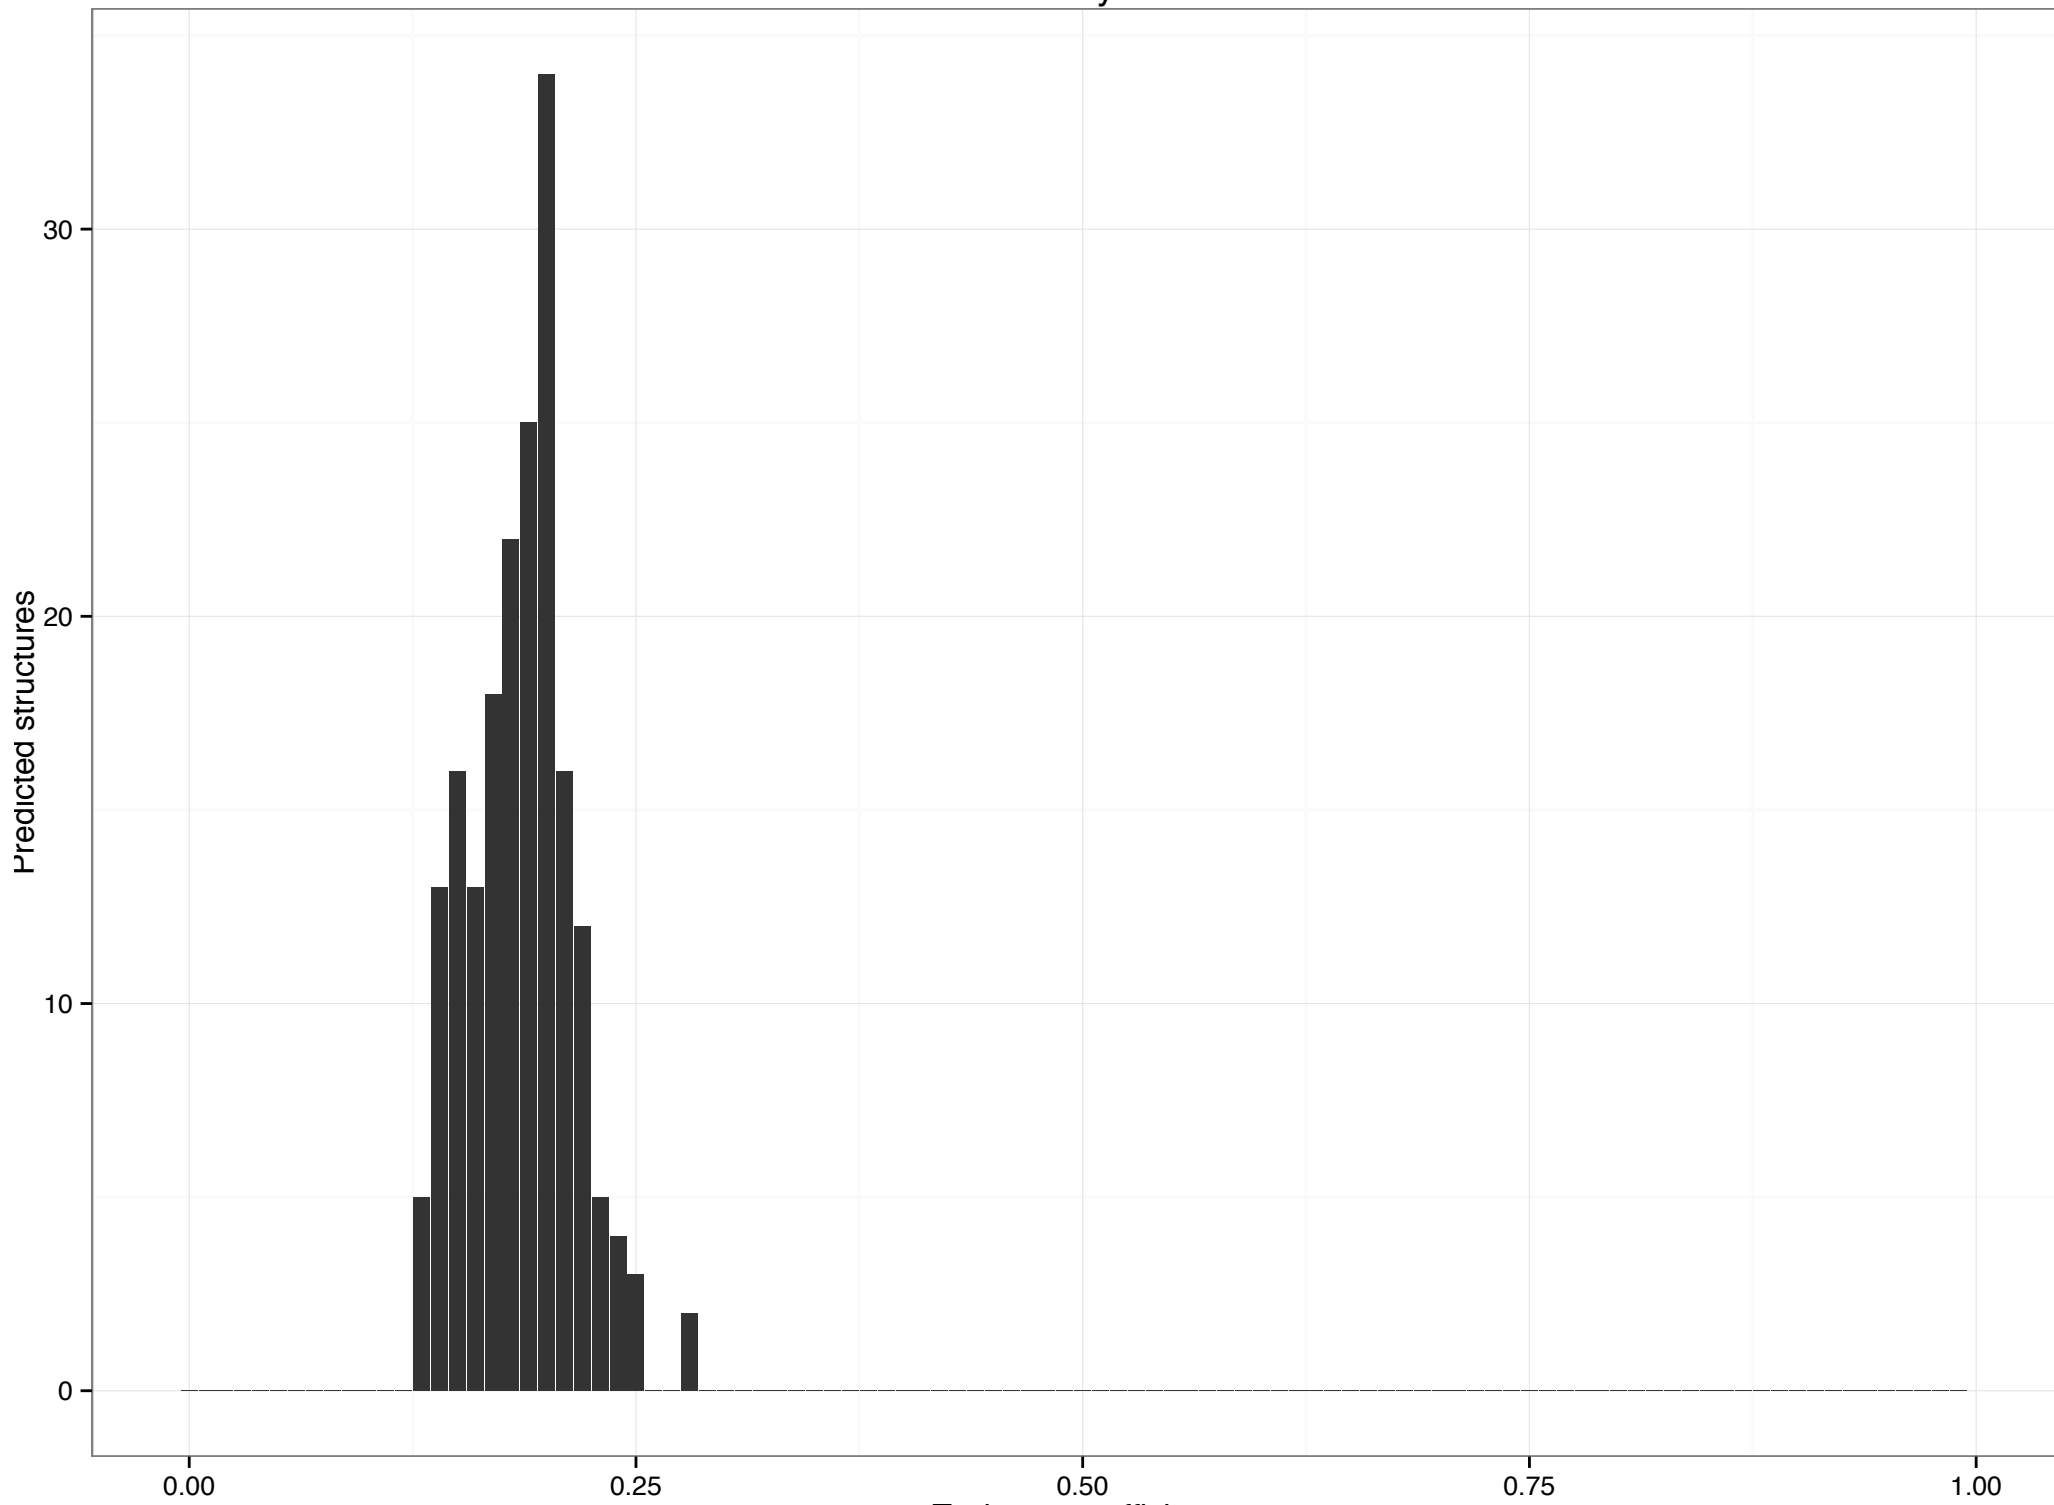

# Vancomycin

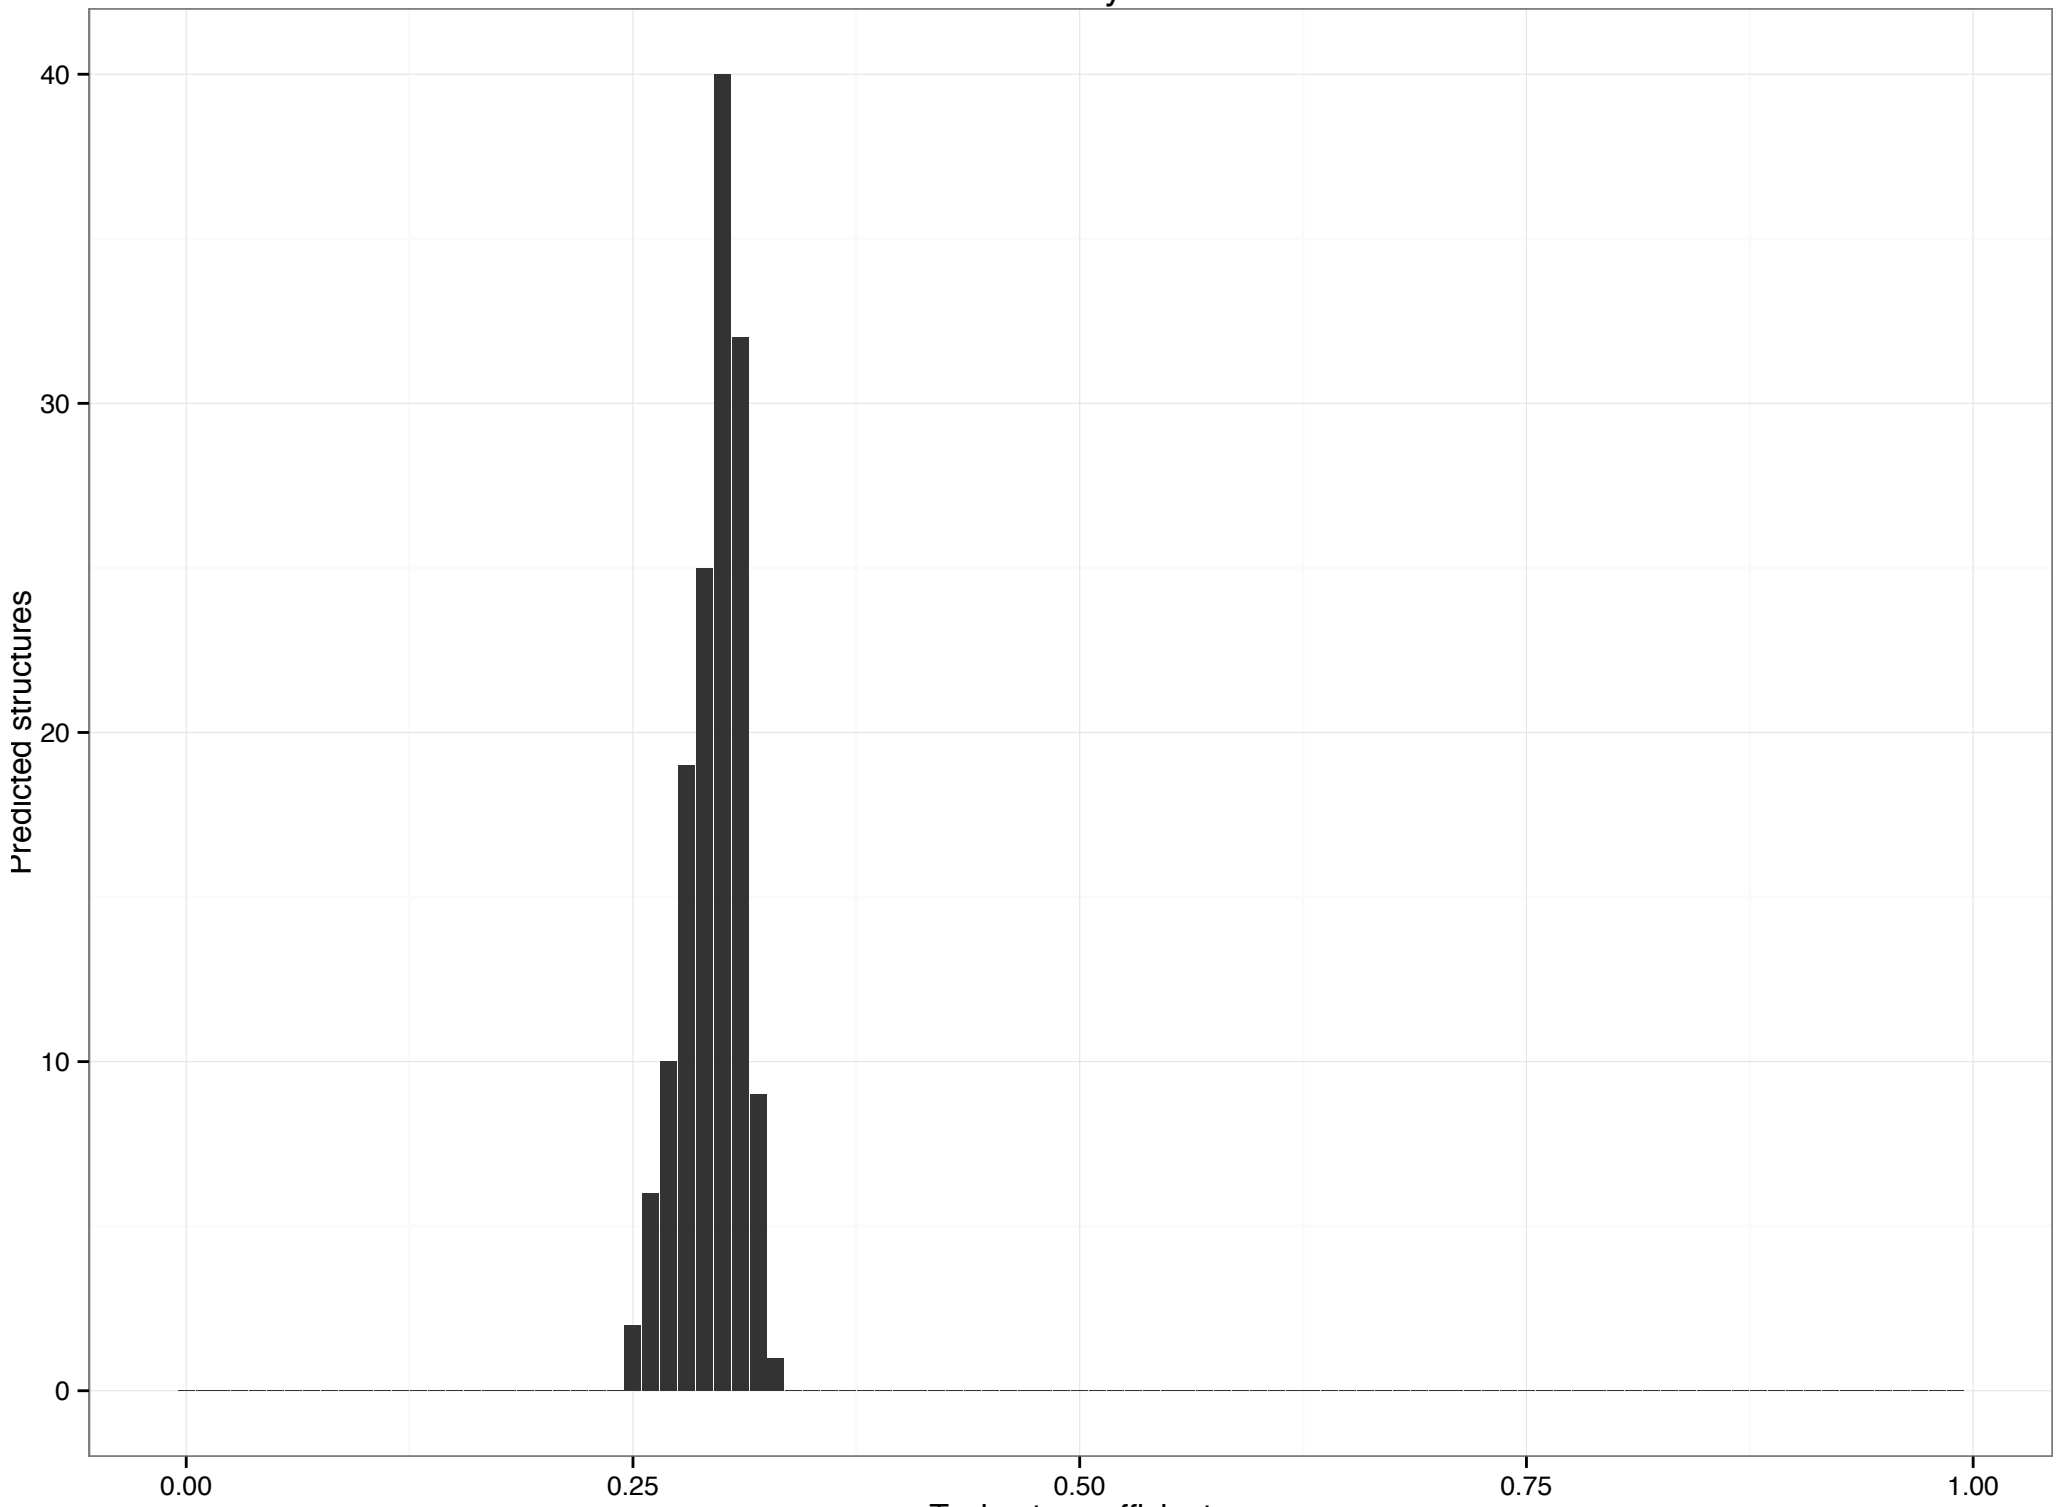

# Zorbamycin

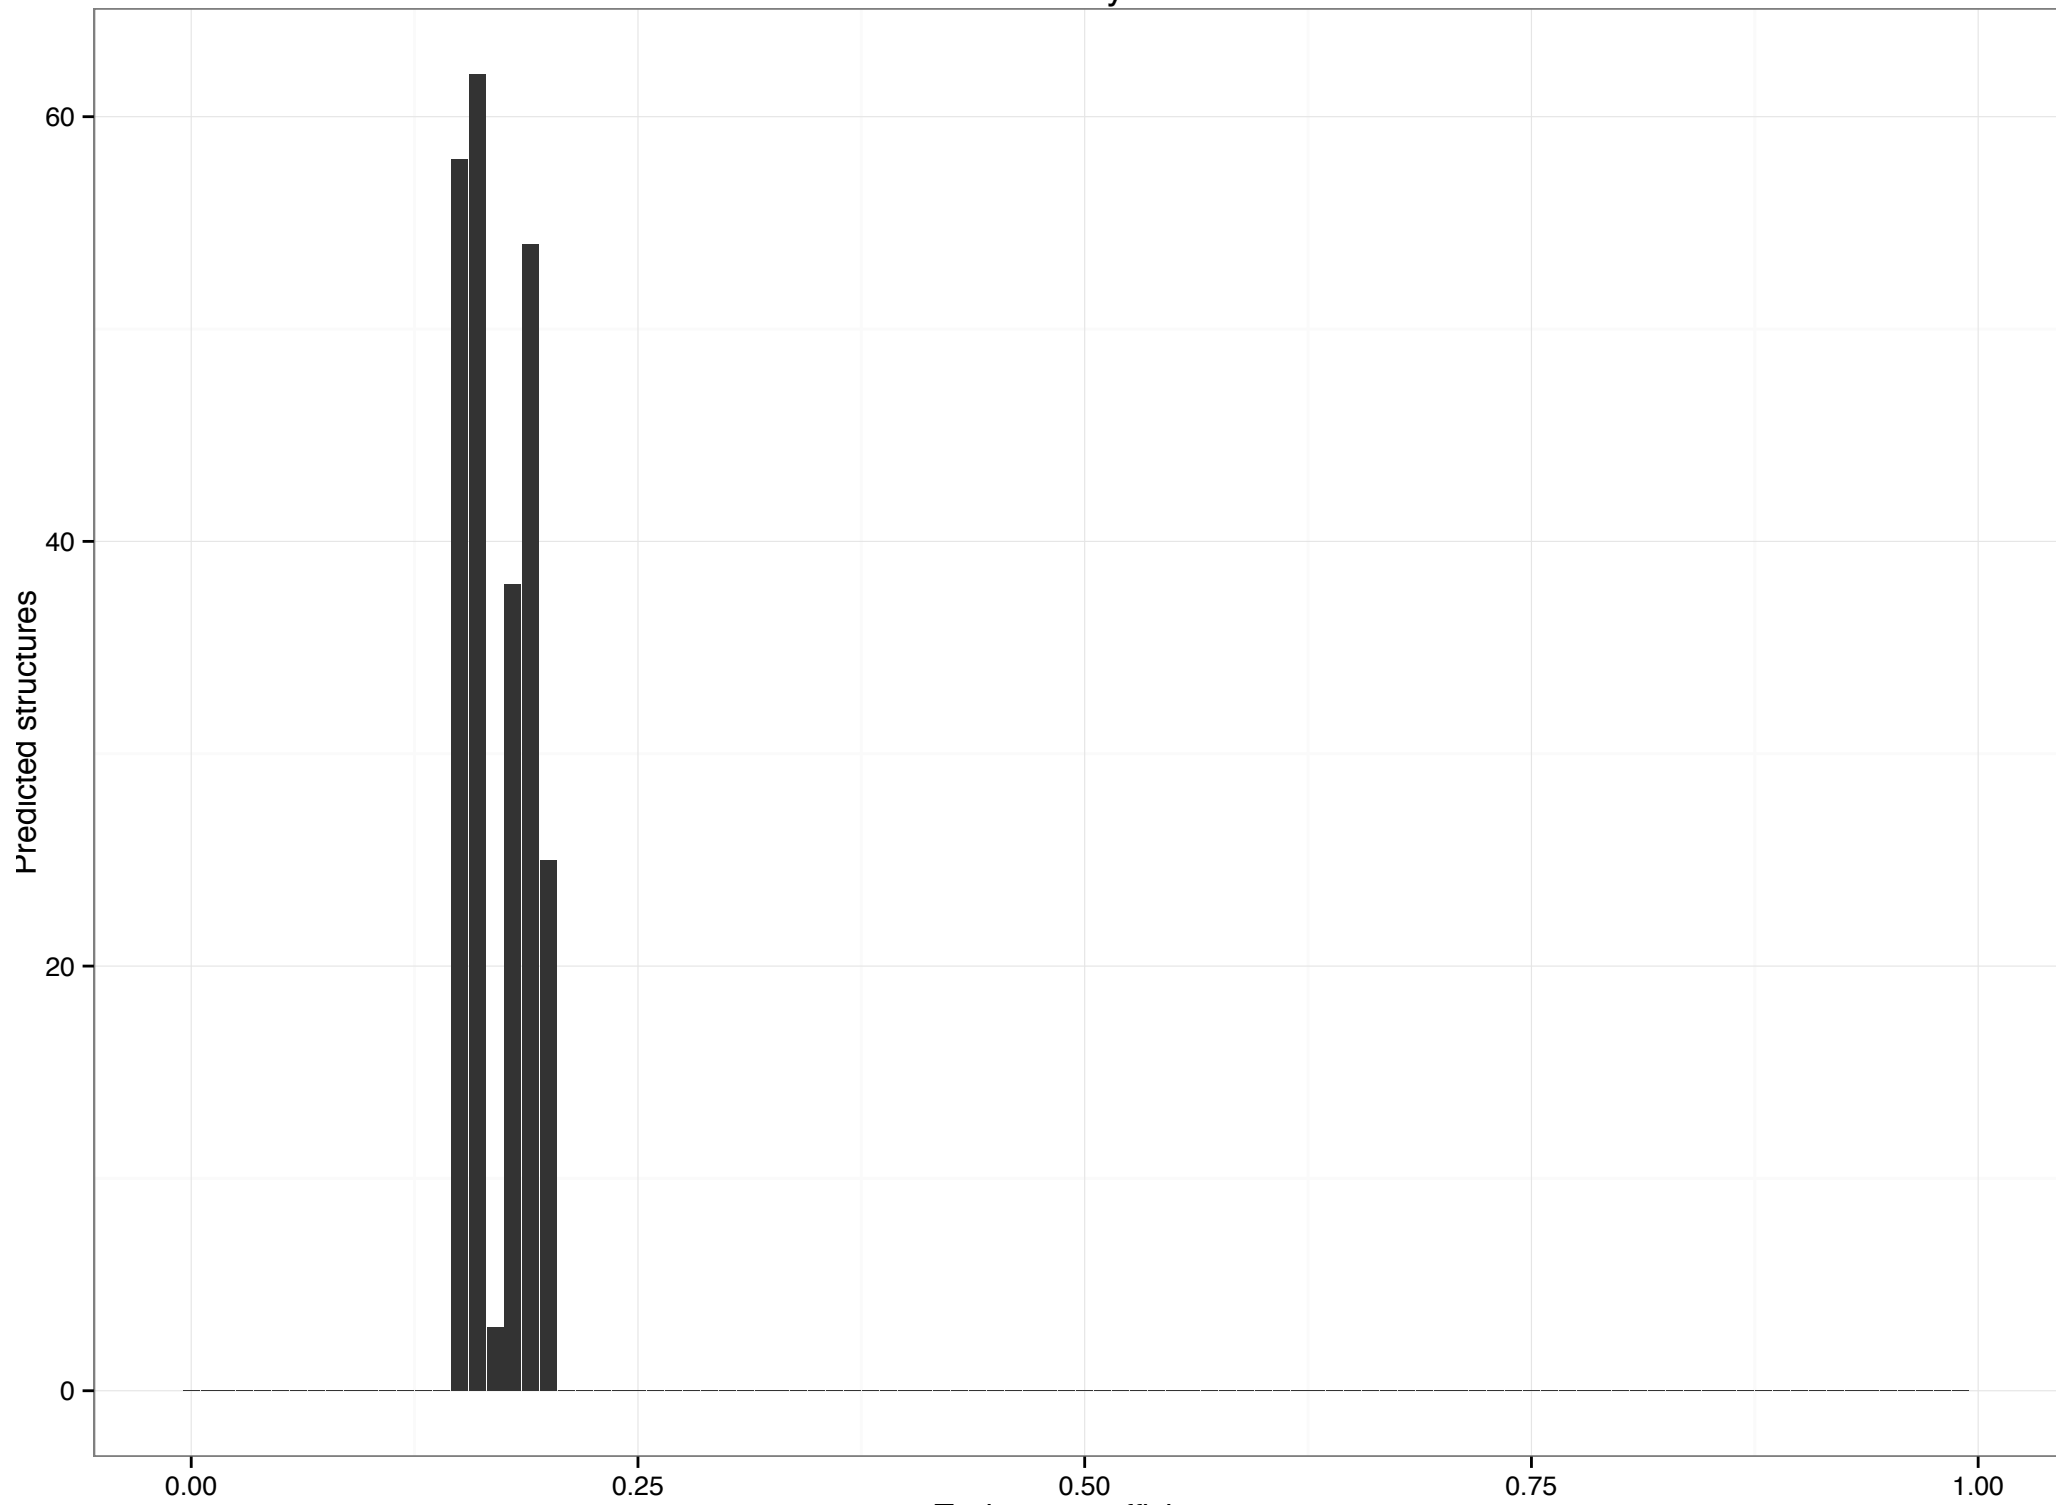

Supplement: supp_gkv1012_nar-01872-z-2015-File016.pdf [file supp_gkv1012_nar-01872-z-2015-File016.pdf]
