# Supplementary material for: Genomes to natural products PRediction Informatics for Secondary Metabolomes (PRISM)
Source: PubMed Central journal article supplement (PMC4787774; doi:10.1093/nar/gkv1012), 2015-10-05
Supplement: supp_gkv1012_nar-01872-z-2015-File015.pdf [file supp_gkv1012_nar-01872-z-2015-File015.pdf]

| Cluster        | Compound order  | Open reading frame permutations | Sugars | Cyclizations | Tailoring reaction plans | Combinatorial plans | Total number of scaffolds generated | True structure                                                                      | Median Tanimoto coefficient | Median structures                                                                     | Top Tanimoto coefficient | Top structures                                                                        |
|----------------|-----------------|---------------------------------|--------|--------------|--------------------------|---------------------|-------------------------------------|-------------------------------------------------------------------------------------|-----------------------------|---------------------------------------------------------------------------------------|--------------------------|---------------------------------------------------------------------------------------|
| cephalosporin  | beta Lactam     | 1                               | 0      | 1            | 1                        | 1                   | 1                                   | 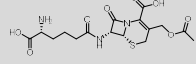   | 0.734                       |    | 0.734                    |    |
| cephamycin C   | beta Lactam     | 1                               | 0      | 1            | 1                        | 1                   | 1                                   |    | 0.52                        |    | 0.52                     |    |
| penicillin     | beta Lactam     | 1                               | 0      | 1            | 1                        | 1                   | 1                                   |    | 1                           |    | 1                        |    |
| anabaenopeptin | Cyclic branched | 1                               | 0      | 2            | 1                        | 2                   | 2                                   |    | 0.261                       |    | 0.261                    |    |
| bacitracin     | Cyclic branched | 1                               | 0      | 2            | 1                        | 2                   | 2                                   |    | 0.332                       |    | 0.332                    |    |
| bassianolide   | Cyclic branched | 1                               | 0      | 1            | 1                        | 1                   | 1                                   |    | 0.143                       |    | 0.143                    |    |
| beauvericin    | Cyclic branched | 1                               | 0      | 1            | 1                        | 1                   | 1                                   |   | 0.079                       |   | 0.079                    |   |
| capreomycin    | Cyclic branched | 1                               | 0      | 4            | 1                        | 4                   | 4                                   |  | 0.329                       |  | 0.331                    |  |
| cereulide      | Cyclic branched | 1                               | 0      | 2            | 1                        | 2                   | 2                                   |  | 0.462                       |  | 0.462                    |  |
| cryptophycin   | Cyclic branched | 1                               | 0      | 4            | 1                        | 4                   | 2                                   |  | 0.34                        |  | 0.34                     |  |
| cyclosporine   | Cyclic branched | 1                               | 0      | 2            | 1                        | 2                   | 2                                   |  | 0.814                       |  | 0.814                    |  |

|                   |                 |                                                                                     |                                                                                       |                                                                                       |    |   |   |    |     |    |       |       |
|-------------------|-----------------|-------------------------------------------------------------------------------------|---------------------------------------------------------------------------------------|---------------------------------------------------------------------------------------|----|---|---|----|-----|----|-------|-------|
| echinomycin       | Cyclic branched | 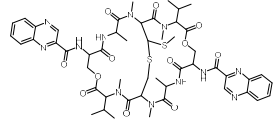    |     |     | 1  | 0 | 3 | 1  | 3   | 2  | 0.258 | 0.258 |
| enniatin          | Cyclic branched |    |    |    | 1  | 0 | 1 | 1  | 1   | 1  | 0.071 | 0.071 |
| gramicidin        | Cyclic branched |   |    |    | 1  | 0 | 2 | 1  | 2   | 2  | 0.396 | 0.396 |
| griselimycin      | Cyclic branched |    |    |    | 1  | 0 | 4 | 1  | 4   | 4  | 0.257 | 0.284 |
| hormaomycin       | Cyclic branched |    |    |    | 1  | 0 | 2 | 1  | 2   | 2  | 0.242 | 0.242 |
| koranimine        | Cyclic branched |   |   |   | 1  | 0 | 2 | 1  | 2   | 2  | 0.438 | 0.438 |
| microcystin       | Cyclic branched |  |  |  | 24 | 0 | 4 | 24 | 114 | 66 | 0.207 | 0.257 |
| nostocyclopeptide | Cyclic branched |  |  |  | 1  | 0 | 2 | 1  | 2   | 2  | 0.644 | 0.644 |
| nostophycin       | Cyclic branched |  |  |  | 1  | 0 | 5 | 1  | 5   | 3  | 0.256 | 0.271 |
| SW-163            | Cyclic branched |  |  |  | 1  | 0 | 3 | 1  | 3   | 2  | 0.11  | 0.11  |

|              |                 |   |   |   |      |        |     |       |       |
|--------------|-----------------|---|---|---|------|--------|-----|-------|-------|
| teixobactin  | Cyclic branched | 1 | 0 | 5 | 1    | 5      | 5   | 0.34  | 0.542 |
| telomycin    | Cyclic branched | 1 | 0 | 6 | 1    | 6      | 5   | 0.255 | 0.317 |
| thiocoraline | Cyclic branched | 1 | 0 | 4 | 1    | 4      | 3   | 0.169 | 0.219 |
| triosin A    | Cyclic branched | 1 | 0 | 3 | 1    | 3      | 2   | 0.285 | 0.285 |
| tyrocydine   | Cyclic branched | 1 | 0 | 2 | 1    | 2      | 2   | 0.586 | 0.586 |
| valinomycin  | Cyclic branched | 1 | 0 | 2 | 1    | 2      | 2   | 1     | 1     |
| viomycin     | Cyclic branched | 1 | 0 | 4 | 2    | 8      | 6   | 0.221 | 0.264 |
| A-74528      | Glycopeptides   | 1 | 0 | 1 | 1    | 1      | 1   | 0.112 | 0.112 |
| A40926       | Glycopeptides   | 6 | 1 | 1 | 2058 | 1,000+ | 246 | 0.188 | 0.205 |
| balhimycin   | Glycopeptides   | 2 | 9 | 1 | 4116 | 1,000+ | 74  | 0.238 | 0.259 |

|                 |      |   |   |        |        |     |                                                                                      |                                                                                       |                                                                                       |       |       |
|-----------------|------|---|---|--------|--------|-----|--------------------------------------------------------------------------------------|---------------------------------------------------------------------------------------|---------------------------------------------------------------------------------------|-------|-------|
| bleomycin       | 500+ | 0 | 5 | 1706   | 1,000+ | 379 | 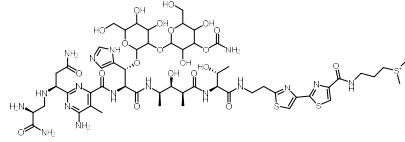    |     |     | 0.182 | 0.24  |
| complestatin    | 1    | 0 | 2 | 6      | 12     | 12  |     |    |    | 0.15  | 0.167 |
| mannopeptimycin | 1    | 1 | 3 | 1      | 3      | 3   |     |    |    | 0.181 | 0.238 |
| ramoplanin      | 6    | 0 | 4 | 54     | 252    | 132 |    |    |    | 0.348 | 0.516 |
| ristocetin      | 1    | 4 | 1 | 117649 | 1,000+ | 175 |    |   |   | 0.23  | 0.259 |
| tallysomyin     | 500+ | 0 | 5 | 1612   | 1,000+ | 413 |  |  |  | 0.175 | 0.228 |
| teicoplanin     | 6    | 1 | 1 | 14406  | 1,000+ | 156 |   |  |  | 0.278 | 0.293 |
| vancomycin      | 1    | 1 | 1 | 216    | 216    | 144 |   |  |  | 0.299 | 0.326 |

|                              |                                                                                      |                                                                                       |                                                                                       |     |     |     |       |       |
|------------------------------|--------------------------------------------------------------------------------------|---------------------------------------------------------------------------------------|---------------------------------------------------------------------------------------|-----|-----|-----|-------|-------|
| Glycopeptides                | 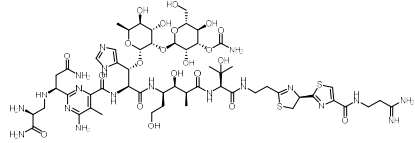    |     |     |     |     |     |       |       |
| zorbamycin                   | 120                                                                                  | 0                                                                                     | 4                                                                                     | 240 | 960 | 240 | 0.172 | 0.202 |
| Lipopeptides                 |     |    |    |     |     |     |       |       |
| A47934                       | 1                                                                                    | 0                                                                                     | 1                                                                                     | 343 | 343 | 42  | 0.181 | 0.2   |
| Lipopeptides                 |     |    |    |     |     |     |       |       |
| arthrofactin                 | 1                                                                                    | 0                                                                                     | 5                                                                                     | 1   | 5   | 5   | 0.4   | 1     |
| Lipopeptides                 |    |    |    |     |     |     |       |       |
| arylomycins                  | 1                                                                                    | 0                                                                                     | 2                                                                                     | 1   | 2   | 2   | 0.312 | 0.312 |
| Lipopeptides                 |     |    |    |     |     |     |       |       |
| bacillomycin                 | 5                                                                                    | 0                                                                                     | 2                                                                                     | 1   | 2   | 1   | 0.144 | 0.144 |
| Lipopeptides                 |    |   |   |     |     |     |       |       |
| calcium dependent antibiotic | 1                                                                                    | 0                                                                                     | 3                                                                                     | 1   | 3   | 3   | 0.293 | 0.416 |
| Lipopeptides                 |  |  |  |     |     |     |       |       |
| cichofactin                  | 1                                                                                    | 0                                                                                     | 4                                                                                     | 1   | 4   | 4   | 0.344 | 0.504 |
| Lipopeptides                 |   |  |  |     |     |     |       |       |
| cystomanamide                | 1                                                                                    | 0                                                                                     | 2                                                                                     | 1   | 2   | 1   | 0.197 | 0.197 |
| Lipopeptides                 |  |  |  |     |     |     |       |       |
| daptomycin                   | 1                                                                                    | 0                                                                                     | 3                                                                                     | 2   | 6   | 4   | 0.636 | 0.645 |
| Lipopeptides                 |   |  |  |     |     |     |       |       |
| echinocandin                 | 1                                                                                    | 0                                                                                     | 2                                                                                     | 1   | 2   | 2   | 0.098 | 0.098 |

|              |   |   |   |   |   |   |                                                                                     |       |                                                                                       |       |                                                                                       |
|--------------|---|---|---|---|---|---|-------------------------------------------------------------------------------------|-------|---------------------------------------------------------------------------------------|-------|---------------------------------------------------------------------------------------|
| eponemycin   | 1 | 0 | 3 | 1 | 3 | 3 | 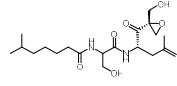    | 0.096 |     | 0.172 |     |
| Lipopeptides |   |   |   |   |   |   |    | 0.375 |    | 0.519 |    |
| fengycin     | 1 | 0 | 3 | 1 | 3 | 3 |    | 0.238 |    | 0.252 |    |
| Lipopeptides |   |   |   |   |   |   |    | 0.42  |    | 0.638 |    |
| fusaricidin  | 1 | 0 | 3 | 1 | 3 | 3 |   | 0.25  |   | 0.326 |   |
| Lipopeptides |   |   |   |   |   |   |  | 0.89  |  | 0.89  |  |
| lichenysin   | 1 | 0 | 2 | 1 | 2 | 2 |  | 0.377 |  | 0.559 |  |
| Lipopeptides |   |   |   |   |   |   |  | 0.224 |  | 0.294 |  |
| micropeptin  | 1 | 0 | 3 | 1 | 3 | 3 |                                                                                     |       |                                                                                       |       |                                                                                       |

|                |   |   |   |   |   |   |                                                                                      |       |                                                                                       |       |                                                                                       |
|----------------|---|---|---|---|---|---|--------------------------------------------------------------------------------------|-------|---------------------------------------------------------------------------------------|-------|---------------------------------------------------------------------------------------|
| nostopeptolide | 1 | 0 | 3 | 1 | 3 | 3 |      | 0.483 |     | 0.551 |     |
| orfamide       | 1 | 0 | 5 | 1 | 5 | 5 |    | 0.252 |    | 0.504 |    |
| pelgipeptin    | 1 | 0 | 1 | 1 | 1 | 1 |     | 0.118 |    | 0.118 |    |
| plipastatin    | 1 | 0 | 3 | 1 | 3 | 3 |     | 0.375 |    | 0.519 |    |
| polymyxin      | 2 | 0 | 3 | 2 | 6 | 6 |    | 0.436 |   | 0.512 |   |
| putisolvin     | 1 | 0 | 5 | 1 | 5 | 5 |  | 0.519 |  | 0.597 |  |
| serobactin     | 1 | 0 | 4 | 1 | 4 | 3 |  | 0.203 |  | 0.274 |  |
| skyllamycin    | 1 | 0 | 5 | 1 | 5 | 5 |   | 0.169 |  | 0.279 |  |
| surfactin      | 1 | 0 | 2 | 1 | 2 | 2 |   | 0.872 |  | 0.872 |  |

|                   |                                                                                     |                                                                                       |                                                                                       |     |        |     |       |       |
|-------------------|-------------------------------------------------------------------------------------|---------------------------------------------------------------------------------------|---------------------------------------------------------------------------------------|-----|--------|-----|-------|-------|
| Lipopeptides      | 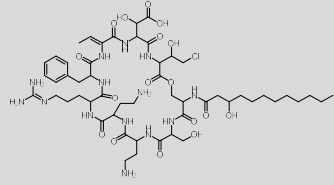    |     |     |     |        |     |       |       |
| syringomycin      | 1                                                                                   | 0                                                                                     | 5                                                                                     | 1   | 5      | 5   | 0.397 | 0.609 |
| Lipopeptides      |   |    |    |     |        |     |       |       |
| thalassospiramide | 1                                                                                   | 0                                                                                     | 1                                                                                     | 1   | 1      | 1   | 0.262 | 0.262 |
| Lipopeptides      |   |    |    |     |        |     |       |       |
| tolaasin          | 1                                                                                   | 0                                                                                     | 8                                                                                     | 1   | 8      | 8   | 0.412 | 0.509 |
| Lipopeptides      |   |    |    |     |        |     |       |       |
| tridecaptin       | 1                                                                                   | 0                                                                                     | 4                                                                                     | 1   | 4      | 4   | 0.391 | 0.556 |
| Macrolides        |    |    |    |     |        |     |       |       |
| amphotericin      | 120                                                                                 | 3                                                                                     | 7                                                                                     | 768 | 1,000+ | 337 | 0.195 | 0.267 |
| Macrolides        |   |   |   |     |        |     |       |       |
| apoptolidin       | 1                                                                                   | 18                                                                                    | 6                                                                                     | 125 | 1,000+ | 60  | 0.308 | 0.387 |
| Macrolides        |  |  |  |     |        |     |       |       |
| asomycin          | 6                                                                                   | 0                                                                                     | 3                                                                                     | 6   | 18     | 12  | 0.221 | 0.307 |
| Macrolides        |  |  |  |     |        |     |       |       |
| bafilomycin       | 24                                                                                  | 0                                                                                     | 8                                                                                     | 24  | 192    | 42  | 0.263 | 0.463 |
| Macrolides        |  |  |  |     |        |     |       |       |
| BE-14106          | 120                                                                                 | 0                                                                                     | 3                                                                                     | 120 | 360    | 184 | 0.38  | 0.634 |
| Macrolides        |  |  |  |     |        |     |       |       |
| borrelidin        | 1                                                                                   | 0                                                                                     | 3                                                                                     | 1   | 3      | 3   | 0.198 | 0.337 |
| Macrolides        |  |  |  |     |        |     |       |       |
| chalconmycin      | 1                                                                                   | 7                                                                                     | 3                                                                                     | 4   | 84     | 4   | 0.229 | 0.244 |



|                |     |    |    |     |        |     |       |       |
|----------------|-----|----|----|-----|--------|-----|-------|-------|
| concanamycin A | 1   | 2  | 7  | 36  | 504    | 180 | 0.436 | 0.559 |
| daunorubicin   | 1   | 1  | 1  | 10  | 10     | 2   | 0.357 | 0.357 |
| epothilone     | 1   | 0  | 4  | 1   | 4      | 4   | 0.258 | 0.322 |
| erythromycin   | 1   | 5  | 4  | 9   | 180    | 36  | 0.259 | 0.327 |
| FK506          | 24  | 0  | 3  | 24  | 72     | 48  | 0.2   | 0.265 |
| FR-008         | 24  | 3  | 10 | 186 | 1,000+ | 267 | 0.181 | 0.228 |
| megalomicin    | 1   | 44 | 4  | 27  | 1,000+ | 24  | 0.225 | 0.254 |
| meridamycin    | 6   | 0  | 9  | 6   | 54     | 54  | 0.286 | 0.653 |
| methymycin     | 1   | 0  | 3  | 1   | 3      | 3   | 0.233 | 0.4   |
| ML-449         | 120 | 0  | 3  | 120 | 360    | 184 | 0.319 | 0.529 |
| natamycin      | 24  | 3  | 6  | 132 | 1,000+ | 335 | 0.218 | 0.362 |

|              |                                                                                     |                                                                                       |                                                                                       |
|--------------|-------------------------------------------------------------------------------------|---------------------------------------------------------------------------------------|---------------------------------------------------------------------------------------|
| Macrolides   | 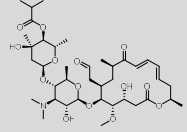    |     |     |
| niddamycin   | 1 0 3 1 3 3                                                                         | 0.183                                                                                 | 0.254                                                                                 |
| Macrolides   |    |    |    |
| nystatin     | 120 3 8 888 1,000+ 335                                                              | 0.243                                                                                 | 0.348                                                                                 |
| Macrolides   |    |    |    |
| oligomycin   | 120 0 8 120 960 960                                                                 | 0.224                                                                                 | 0.399                                                                                 |
| Macrolides   |    |    |    |
| pikromycin   | 1 1 3 2 6 6                                                                         | 0.32                                                                                  | 0.404                                                                                 |
| Macrolides   |    |    |    |
| pimaricin    | 24 3 6 132 1,000+ 335                                                               | 0.232                                                                                 | 0.372                                                                                 |
| Macrolides   |   |   |   |
| rapamycin    | 6 0 3 6 18 12                                                                       | 0.221                                                                                 | 0.286                                                                                 |
| Macrolides   |  |  |  |
| rimocidin    | 1 3 1 1 3 1                                                                         | 0.058                                                                                 | 0.058                                                                                 |
| Macrolides   |  |  |  |
| tetramycin   | 24 3 6 108 1,000+ 188                                                               | 0.189                                                                                 | 0.278                                                                                 |
| Macrolides   |  |  |  |
| thuggacin    | 1 0 6 1 6 6                                                                         | 0.226                                                                                 | 0.244                                                                                 |
| Macrolides   |  |  |  |
| ty lactone   | 1 0 3 1 3 3                                                                         | 0.337                                                                                 | 0.658                                                                                 |
| Macrolides   |  |  |  |
| vicenistatin | 6 1 2 6 12 4                                                                        | 0.266                                                                                 | 0.294                                                                                 |

|             |    |   |   |   |   |                                                                                      |       |                                                                                       |  |                                                                                       |
|-------------|----|---|---|---|---|--------------------------------------------------------------------------------------|-------|---------------------------------------------------------------------------------------|--|---------------------------------------------------------------------------------------|
|             |    |   |   |   |   | 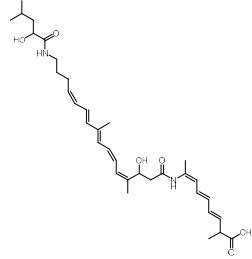     |       |     |  |     |
| Trans AT    |    |   |   |   |   |                                                                                      |       |                                                                                       |  |                                                                                       |
| bacillaene  | 8  | 0 | 5 | 1 | 5 | 5                                                                                    | 0.132 |                                                                                       |  | 0.199                                                                                 |
|             |    |   |   |   |   |     |       |    |  |    |
| Trans AT    |    |   |   |   |   |                                                                                      |       |                                                                                       |  |                                                                                       |
| bryostatins | 7  | 0 | 5 | 1 | 5 | 5                                                                                    | 0.161 |                                                                                       |  | 0.198                                                                                 |
|             |    |   |   |   |   |     |       |    |  |    |
| Trans AT    |    |   |   |   |   |                                                                                      |       |                                                                                       |  |                                                                                       |
| chivosazols | 6  | 0 | 6 | 1 | 6 | 6                                                                                    | 0.141 |                                                                                       |  | 0.148                                                                                 |
|             |    |   |   |   |   |     |       |    |  |    |
| Trans AT    |    |   |   |   |   |                                                                                      |       |                                                                                       |  |                                                                                       |
| difficidins | 11 | 0 | 5 | 1 | 5 | 5                                                                                    | 0.152 |                                                                                       |  | 0.169                                                                                 |
|             |    |   |   |   |   |     |       |    |  |    |
| Trans AT    |    |   |   |   |   |                                                                                      |       |                                                                                       |  |                                                                                       |
| disorazoles | 4  | 0 | 3 | 1 | 3 | 3                                                                                    | 0.131 |                                                                                       |  | 0.154                                                                                 |
|             |    |   |   |   |   |   |       |  |  |  |
| Trans AT    |    |   |   |   |   |                                                                                      |       |                                                                                       |  |                                                                                       |
| elansolids  | 11 | 0 | 6 | 1 | 6 | 5                                                                                    | 0.171 |                                                                                       |  | 0.205                                                                                 |
|             |    |   |   |   |   |  |       |  |  |  |
| Trans AT    |    |   |   |   |   |                                                                                      |       |                                                                                       |  |                                                                                       |
| etnangiens  | 10 | 0 | 8 | 1 | 8 | 8                                                                                    | 0.236 |                                                                                       |  | 0.271                                                                                 |
|             |    |   |   |   |   |   |       |  |  |  |
| Trans AT    |    |   |   |   |   |                                                                                      |       |                                                                                       |  |                                                                                       |
| iturins     | 5  | 0 | 2 | 1 | 2 | 1                                                                                    | 0.178 |                                                                                       |  | 0.178                                                                                 |
|             |    |   |   |   |   |   |       |  |  |  |
| Trans AT    |    |   |   |   |   |                                                                                      |       |                                                                                       |  |                                                                                       |
| kirromycins | 10 | 0 | 5 | 1 | 5 | 5                                                                                    | 0.155 |                                                                                       |  | 0.193                                                                                 |
|             |    |   |   |   |   |   |       |  |  |  |
| Trans AT    |    |   |   |   |   |                                                                                      |       |                                                                                       |  |                                                                                       |
| lankacids   | 5  | 0 | 3 | 1 | 3 | 3                                                                                    | 0.078 |                                                                                       |  | 0.098                                                                                 |

|                 |    |   |   |     |     |    |                                                                                      |       |                                                                                       |       |                                                                                       |
|-----------------|----|---|---|-----|-----|----|--------------------------------------------------------------------------------------|-------|---------------------------------------------------------------------------------------|-------|---------------------------------------------------------------------------------------|
| leinamycin      | 3  | 0 | 3 | 1   | 3   | 3  | 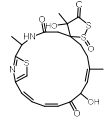     | 0.113 |     | 0.151 |     |
| macrolactin     | 6  | 0 | 4 | 1   | 4   | 4  |     | 0.136 |    | 0.143 |    |
| mupirocin       | 6  | 0 | 3 | 1   | 3   | 3  |     | 0.12  |    | 0.124 |    |
| myxovirescin    | 6  | 0 | 3 | 1   | 3   | 3  |     | 0.094 |    | 0.121 |    |
| oxazolomycin    | 8  | 0 | 3 | 1   | 3   | 3  |     | 0.157 |    | 0.173 |    |
| pederin         | 3  | 0 | 5 | 1   | 5   | 5  |     | 0.128 |    | 0.151 |    |
| psymberin       | 2  | 0 | 6 | 1   | 6   | 6  |     | 0.171 |    | 0.193 |    |
| rhizoxin        | 10 | 0 | 5 | 1   | 5   | 5  |    | 0.165 |   | 0.199 |   |
| thailandamide   | 10 | 0 | 6 | 1   | 6   | 1  |  | 0.175 |  | 0.175 |  |
| virginiamycin   | 34 | 0 | 4 | 6   | 28  | 28 |   | 0.153 |  | 0.191 |  |
| A54145          | 1  | 0 | 5 | 1   | 5   | 4  |   | 0.478 |  | 0.571 |  |
| aclacinomycin A | 1  | 4 | 1 | 100 | 400 | 9  |   | 0.223 |  | 0.258 |  |

|                   |         |   |      |   |       |        |    |                                                                                     |       |                                                                                       |       |                                                                                       |
|-------------------|---------|---|------|---|-------|--------|----|-------------------------------------------------------------------------------------|-------|---------------------------------------------------------------------------------------|-------|---------------------------------------------------------------------------------------|
| actinorhodin      | Type II | 1 | 42   | 1 | 2000  | 1,000+ | 4  | 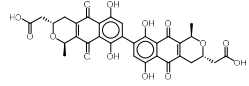    | 0.179 |     | 0.182 |     |
| alnumycin         | Type II | 1 | 0    | 1 | 1     | 1      | 1  |    | 0.114 |    | 0.114 |    |
| aranciamycin      | Type II | 1 | 1    | 1 | 10    | 10     | 4  |    | 0.487 |    | 0.491 |    |
| BE-7585A          | Type II | 1 | 1    | 1 | 10    | 10     | 3  |    | 0.22  |    | 0.23  |    |
| benastatin        | Type II | 1 | 0    | 1 | 1     | 1      | 1  |    | 0.37  |    | 0.37  |    |
| chlortetracycline | Type II | 1 | 0    | 1 | 8     | 8      | 4  |    | 0.207 |    | 0.227 |    |
| chromomycin       | Type II | 1 | 100+ | 1 | 10000 | 1,000+ | 4  |    | 0.201 |    | 0.254 |    |
| chrysomycin       | Type II | 1 | 2    | 1 | 10    | 20     | 4  |  | 0.295 |  | 0.308 |  |
| cosmomycin        | Type II | 1 | 2    | 1 | 100   | 200    | 1  |  | 0.1   |  | 0.1   |  |
| dactylocycline    | Type II | 1 | 1    | 1 | 72    | 72     | 20 |  | 0.215 |  | 0.245 |  |
| elloramycin       | Type II | 1 | 1    | 1 | 10    | 10     | 5  |  | 0.257 |  | 0.304 |  |
| enterocin         | Type II | 1 | 0    | 1 | 1     | 1      | 1  |  | 0.223 |  | 0.223 |  |
| erdacin           | Type II | 1 | 0    | 1 | 1     | 1      | 1  |  | 0.208 |  | 0.208 |  |

|                |         |   |      |   |        |        |    |                                                                                      |       |                                                                                       |       |                                                                                       |
|----------------|---------|---|------|---|--------|--------|----|--------------------------------------------------------------------------------------|-------|---------------------------------------------------------------------------------------|-------|---------------------------------------------------------------------------------------|
| FD-594         | Type II | 1 | 7    | 1 | 169    | 1,000+ | 16 | 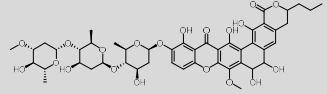     | 0.22  |     | 0.258 |     |
| fredericamycin | Type II | 1 | 0    | 1 | 1      | 1      | 1  |     | 0.167 |    | 0.167 |    |
| frenolicin     | Type II | 1 | 0    | 1 | 1      | 1      | 1  |     | 0.333 |    | 0.333 |    |
| gilvocarcin    | Type II | 1 | 1    | 1 | 10     | 10     | 3  |     | 0.205 |    | 0.212 |    |
| granaticin     | Type II | 1 | 4    | 1 | 8      | 32     | 3  |     | 0.176 |    | 0.177 |    |
| grisorhodin    | Type II | 1 | 0    | 1 | 1      | 1      | 1  |     | 0.11  |    | 0.11  |    |
| Hedamycin      | Type II | 1 | 23   | 1 | 100    | 1,000+ | 8  |     | 0.177 |    | 0.2   |    |
| jadomycin      | Type II | 1 | 3    | 1 | 10     | 30     | 3  |   | 0.295 |  | 0.36  |  |
| kinamycin      | Type II | 1 | 0    | 1 | 1      | 1      | 1  |   | 0.092 |  | 0.092 |  |
| landomycin     | Type II | 1 | 100+ | 1 | 10000  | 1,000+ | 5  |  | 0.155 |  | 0.203 |  |
| lysolipin      | Type II | 1 | 3    | 1 | 156    | 468    | 20 |   | 0.16  |  | 0.179 |  |
| medermycin     | Type II | 1 | 1    | 1 | 8      | 8      | 3  |   | 0.264 |  | 0.279 |  |
| mithramycin    | Type II | 1 | 100+ | 1 | 200000 | 1,000+ | 3  |   | 0.148 |  | 0.158 |  |

|                  |         |   |      |   |       |        |    |                                                                                     |       |                                                                                       |       |                                                                                       |
|------------------|---------|---|------|---|-------|--------|----|-------------------------------------------------------------------------------------|-------|---------------------------------------------------------------------------------------|-------|---------------------------------------------------------------------------------------|
| naphthocyclinone | Type II | 1 | 0    | 1 | 1     | 1      | 1  | 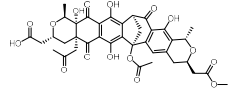    | 0.222 |     | 0.222 |     |
| nogalamycin      | Type II | 1 | 100+ | 1 | 1000  | 1,000+ | 3  |    | 0.373 |    | 0.373 |    |
| polyketomycin    | Type II | 1 | 12   | 1 | 2000  | 1,000+ | 16 |    | 0.156 |    | 0.165 |    |
| pradimicin       | Type II | 1 | 3    | 1 | 144   | 432    | 10 |    | 0.279 |    | 0.287 |    |
| R1128            | Type II | 1 | 0    | 1 | 1     | 1      | 1  |    | 0.149 |    | 0.149 |    |
| ravidomycin      | Type II | 1 | 2    | 1 | 10    | 20     | 3  |    | 0.275 |    | 0.295 |    |
| resistomycin     | Type II | 1 | 0    | 1 | 1     | 1      | 1  |   | 0.055 |    | 0.055 |    |
| rubrinomycin     | Type II | 1 | 0    | 1 | 1     | 1      | 1  |  | 0.075 |  | 0.075 |  |
| saquayamycin     | Type II | 1 | 100+ | 1 | 1E+06 | 1,000+ | 2  |  | 0.218 |  | 0.218 |  |
| Sch 47554        | Type II | 1 | 91   | 1 | 1000  | 1,000+ | 2  |  | 0.236 |  | 0.236 |  |
| SF2575           | Type II | 1 | 2    | 1 | 9     | 18     | 4  |  | 0.198 |  | 0.207 |  |
| simocyclinone    | Type II | 1 | 2    | 1 | 1800  | 1,000+ | 9  |  | 0.171 |  | 0.214 |  |

|              |         |   |      |   |       |        |    |                                                                                   |       |                                                                                     |       |                                                                                     |
|--------------|---------|---|------|---|-------|--------|----|-----------------------------------------------------------------------------------|-------|-------------------------------------------------------------------------------------|-------|-------------------------------------------------------------------------------------|
| steffimycin  | Type II | 1 | 1    | 1 | 10    | 10     | 4  | 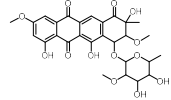  | 0.323 |   | 0.385 |   |
| tetracycline | Type II | 1 | 0    | 1 | 1     | 1      | 1  |  | 0.214 |  | 0.214 |  |
| urdamycin    | Type II | 1 | 100+ | 1 | 10000 | 1,000+ | 5  |  | 0.141 |  | 0.18  |  |
| xantholipin  | Type II | 1 | 3    | 1 | 156   | 468    | 20 |  | 0.17  |  | 0.194 |  |
