# Supplementary material for: Genomes to natural products PRediction Informatics for Secondary Metabolomes (PRISM)
Source: PubMed Central journal article supplement (PMC4787774; doi:10.1093/nar/gkv1012), 2015-10-05

- Tyrosine/phenylglycine
- Aromatic starter unit
- Branched-chain amino acid
- Threonine
- Pyrrole
- Histidine
- Tryptophan
- Type II polyketide

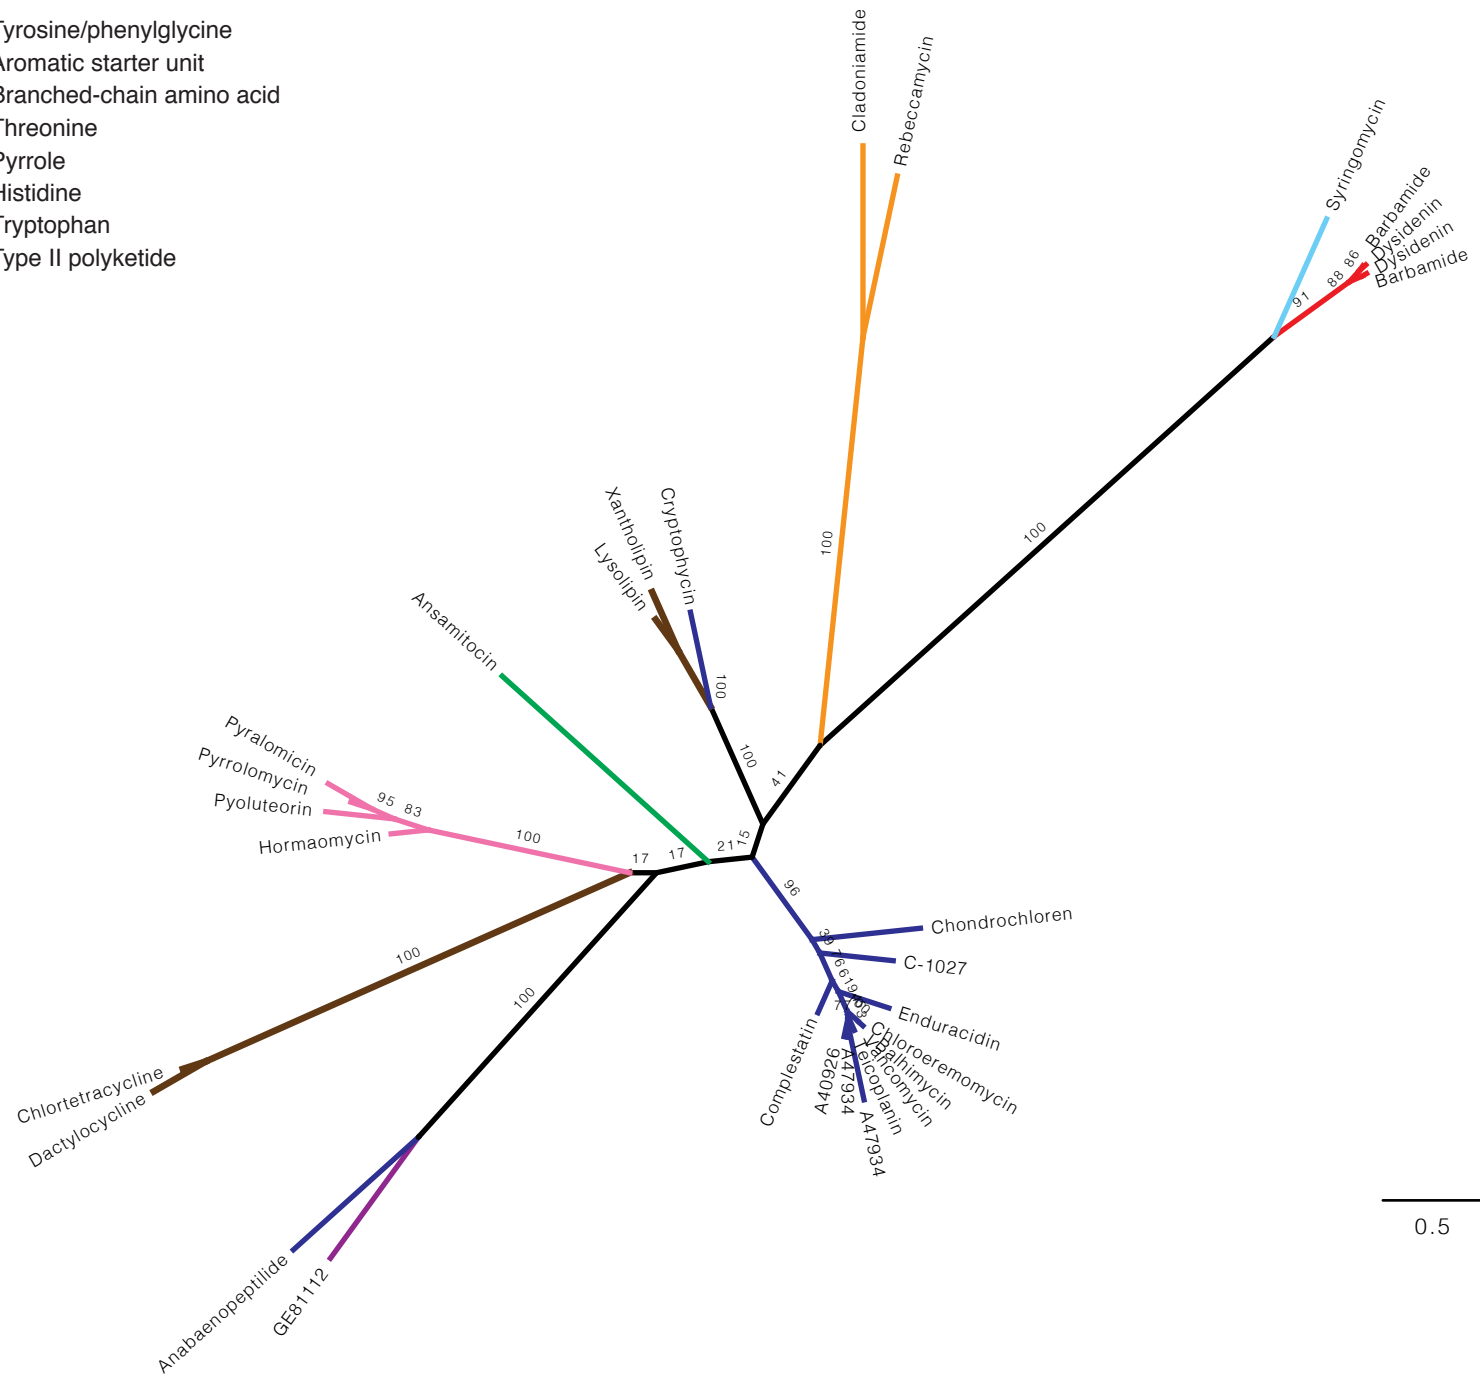

Supplement: supp_gkv1012_nar-01872-z-2015-File019.pdf [file supp_gkv1012_nar-01872-z-2015-File019.pdf]
