# Supplementary material for: Genomes to natural products PRediction Informatics for Secondary Metabolomes (PRISM)
Source: PubMed Central journal article supplement (PMC4787774; doi:10.1093/nar/gkv1012), 2015-10-05

# Threonine adenylation domains

- Acyl-adenylate ligase
- Aryl-adenylate ligase
- Docking adenylation domain
- Starter adenylation domain
- Trans adenylation domain
- Standalone adenylation domain
- Biosynthetically inactive domain
- Adenylation module without thiolation domain

## 3-formamido-2-hydroxybenzoic acid ligases

## Dihydroxycyclohexane-carboxylic acid ligases

## 3-amino-5-hydroxybenzoic acid ligases

## Aromatic starter unit ligases

## $\alpha$ -hydroxy and $\alpha$ -ketoacids

## Fatty acid ligases

## Prolyl-AMP ligases

## Quinoxalate/quinoxaline biosynthesis domains

## $\beta$ -hydroxytyrosine biosynthesis domains

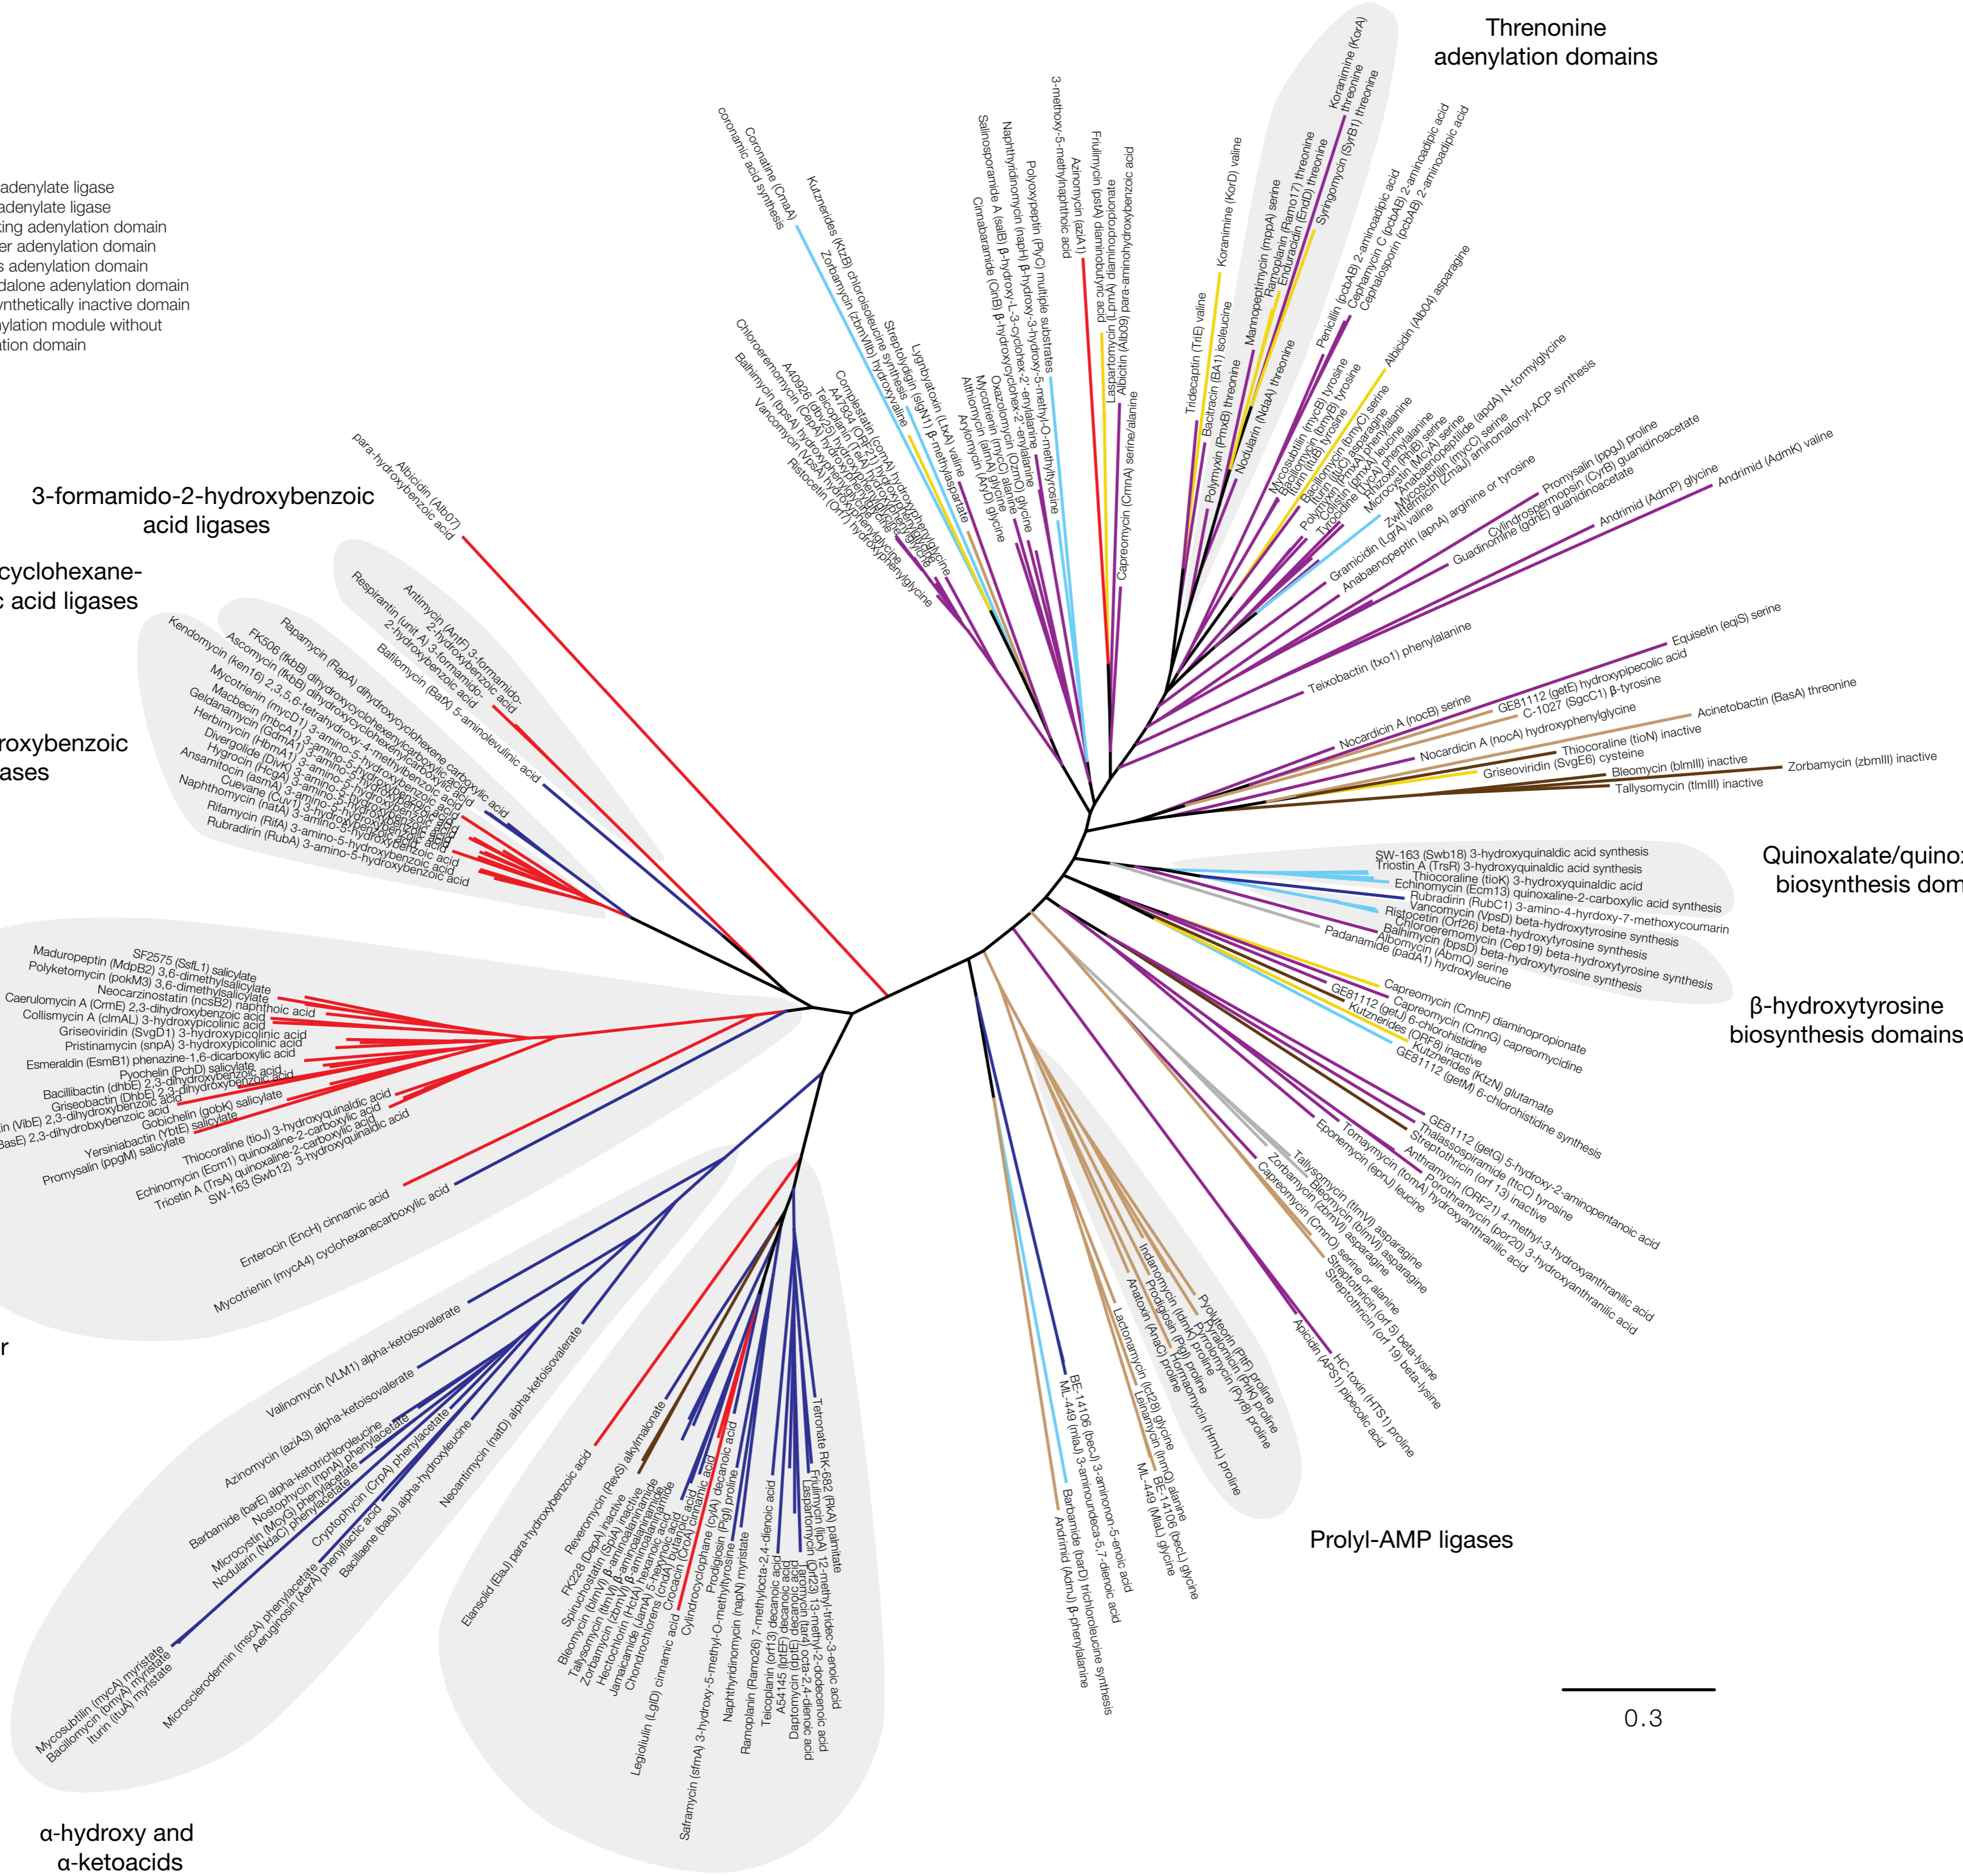

Supplement: supp_gkv1012_nar-01872-z-2015-File020.pdf [file supp_gkv1012_nar-01872-z-2015-File020.pdf]
